# Supplementary material for: Associations between sexual habits, menstrual hygiene practices, demographics and the vaginal microbiome as revealed by Bayesian network analysis
Source: PubMed Central journal article supplement (PMC5783405; doi:10.1371/journal.pone.0191625), 2018-01-24

L.in

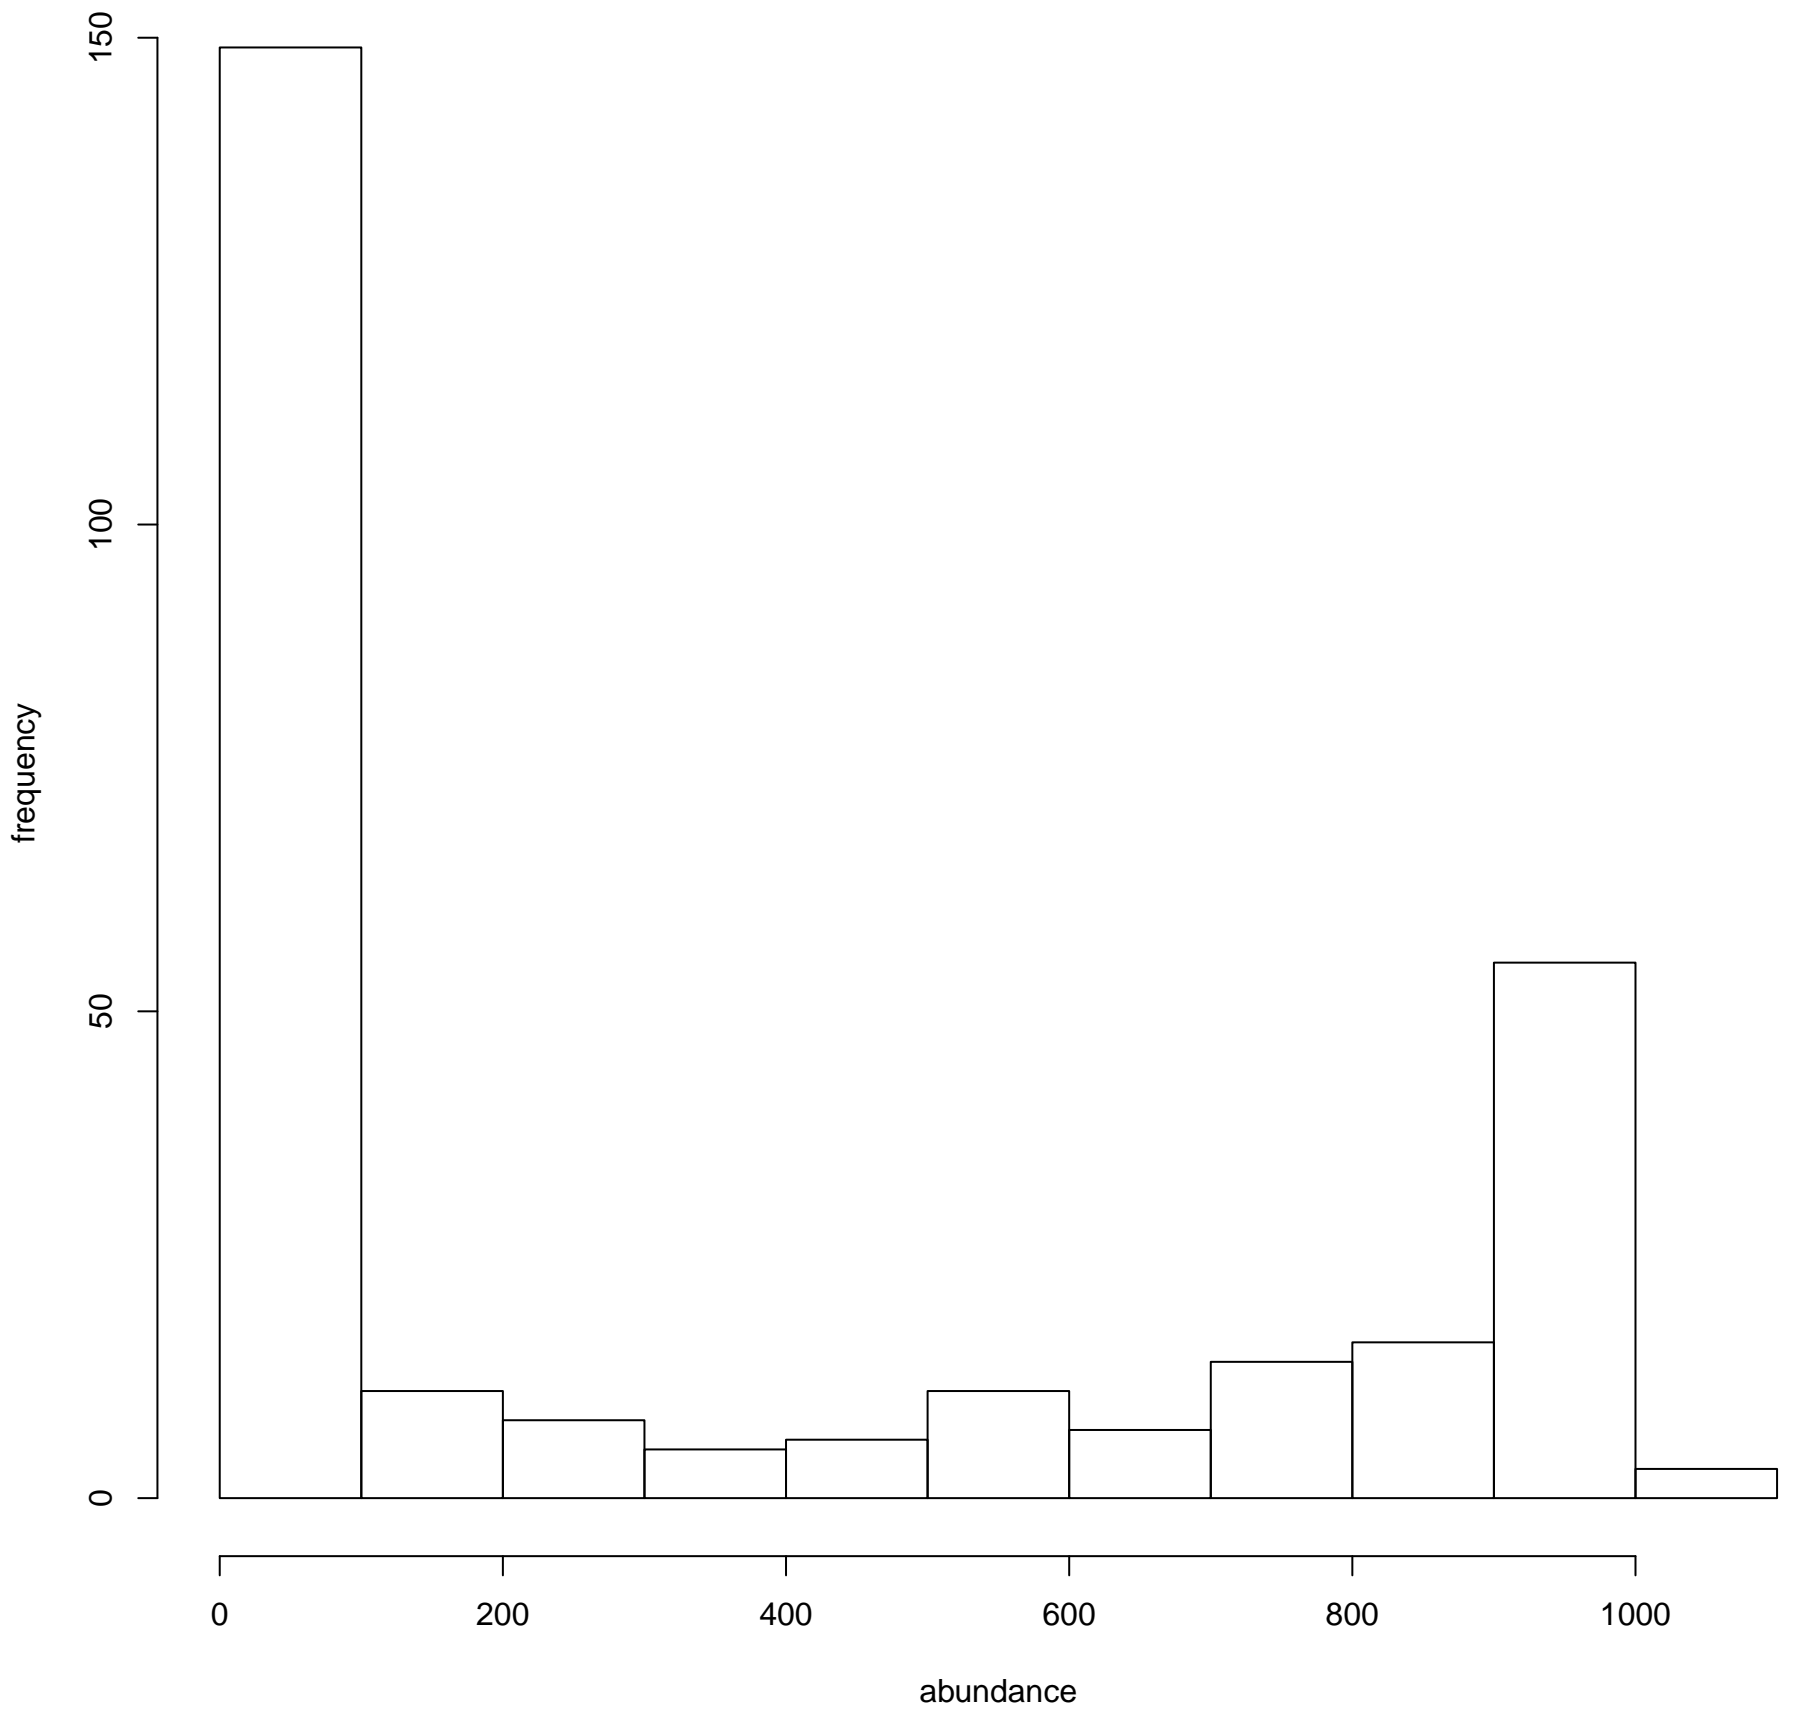

L.cr

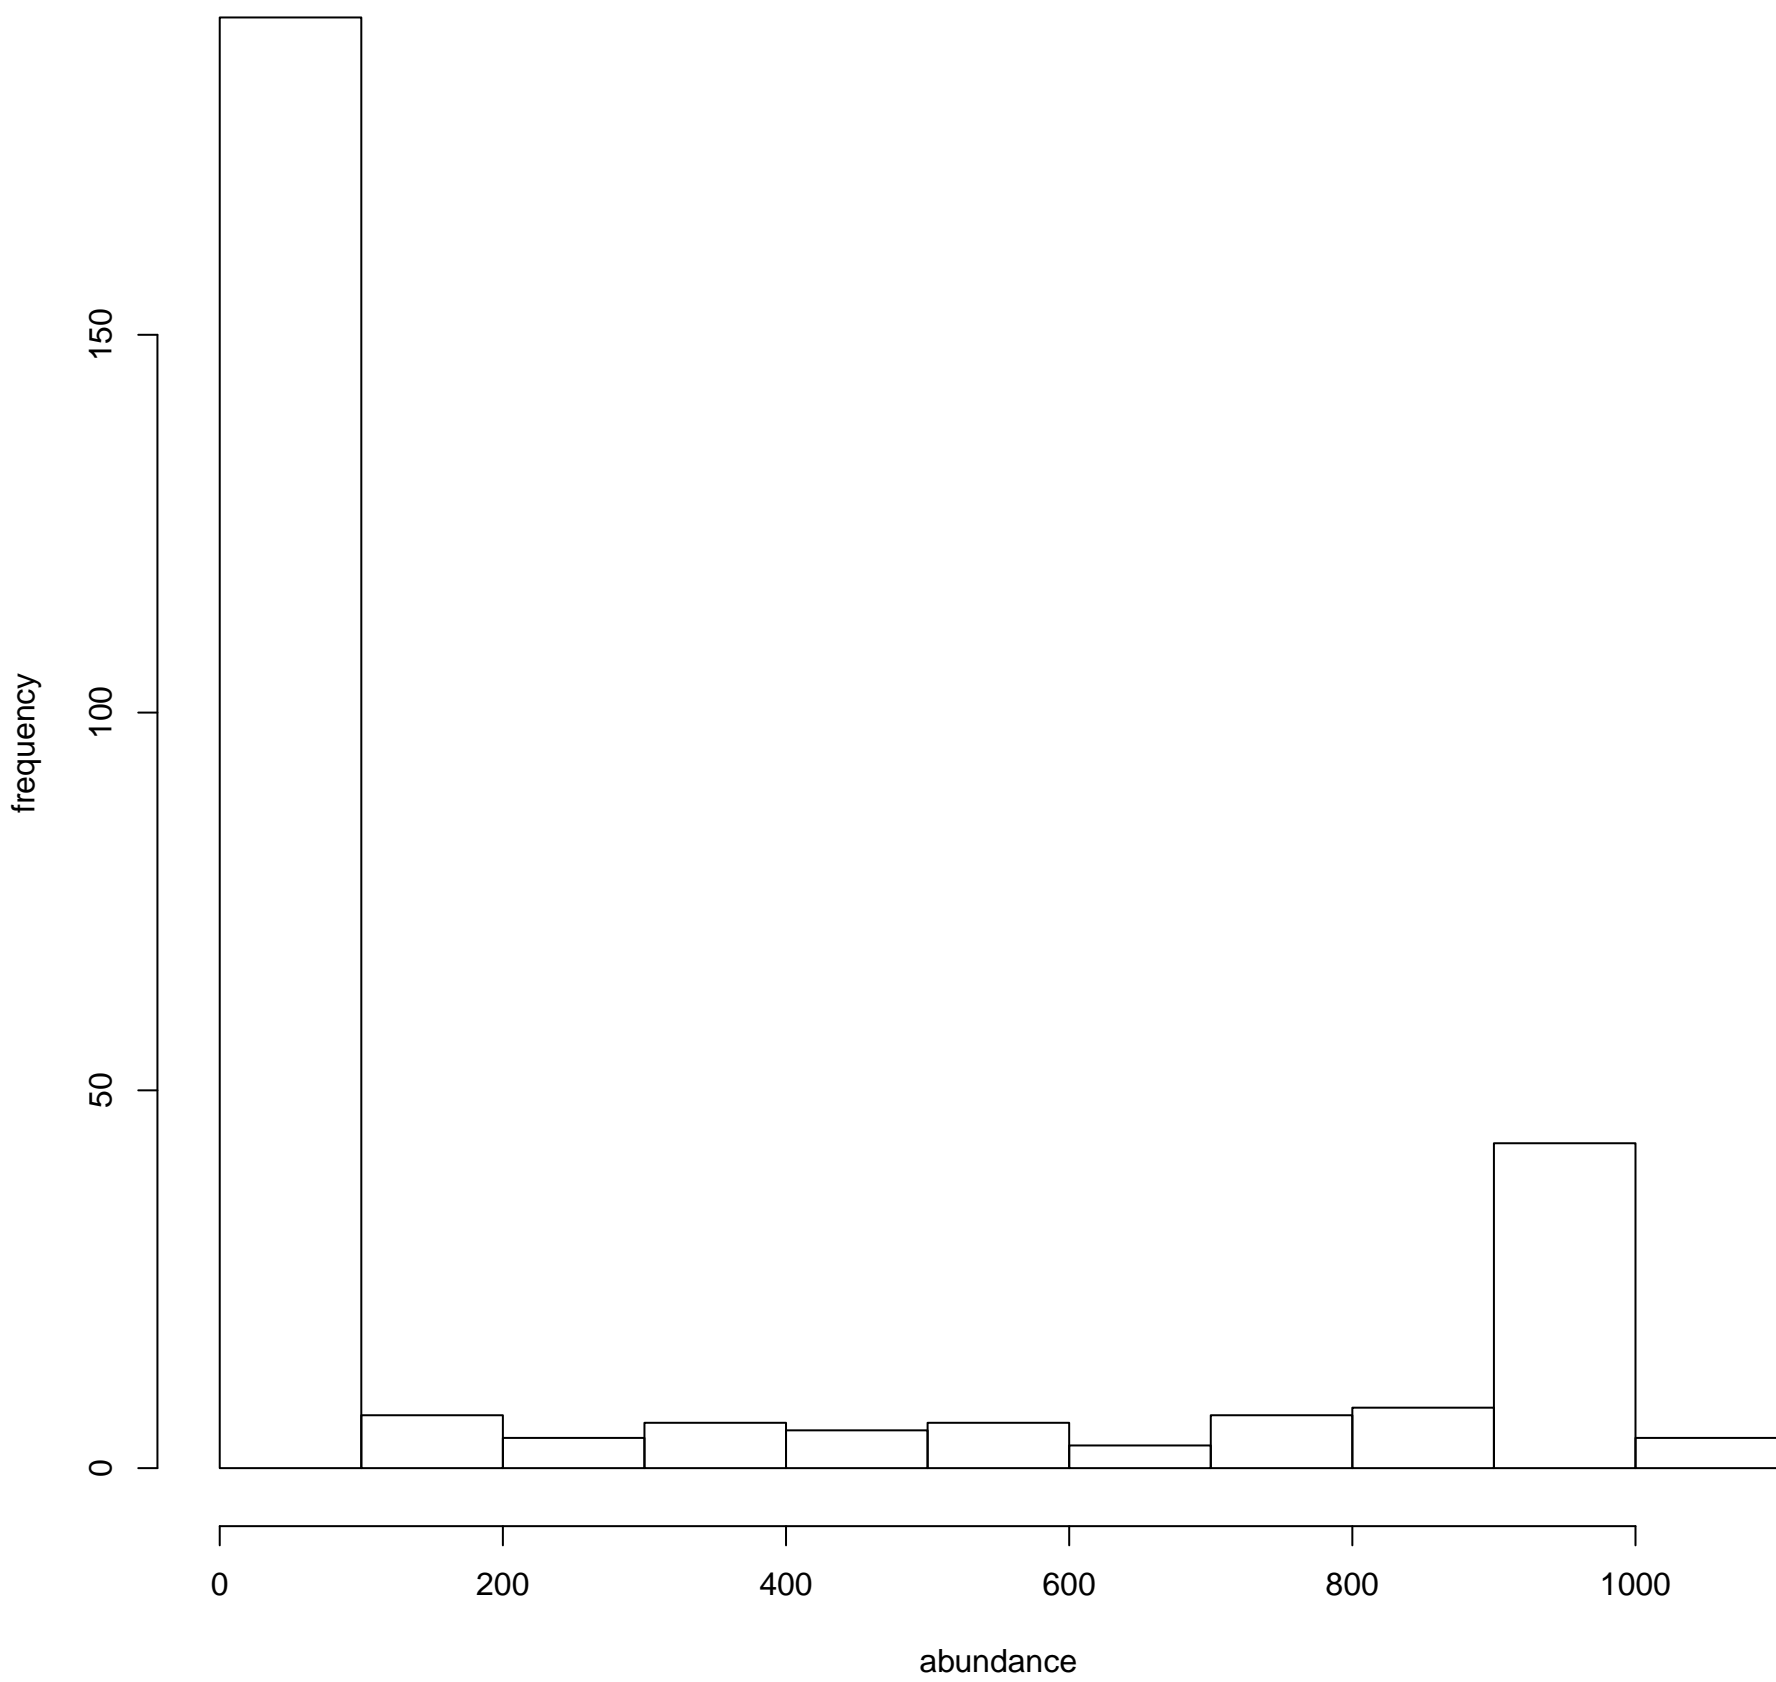

L.ga

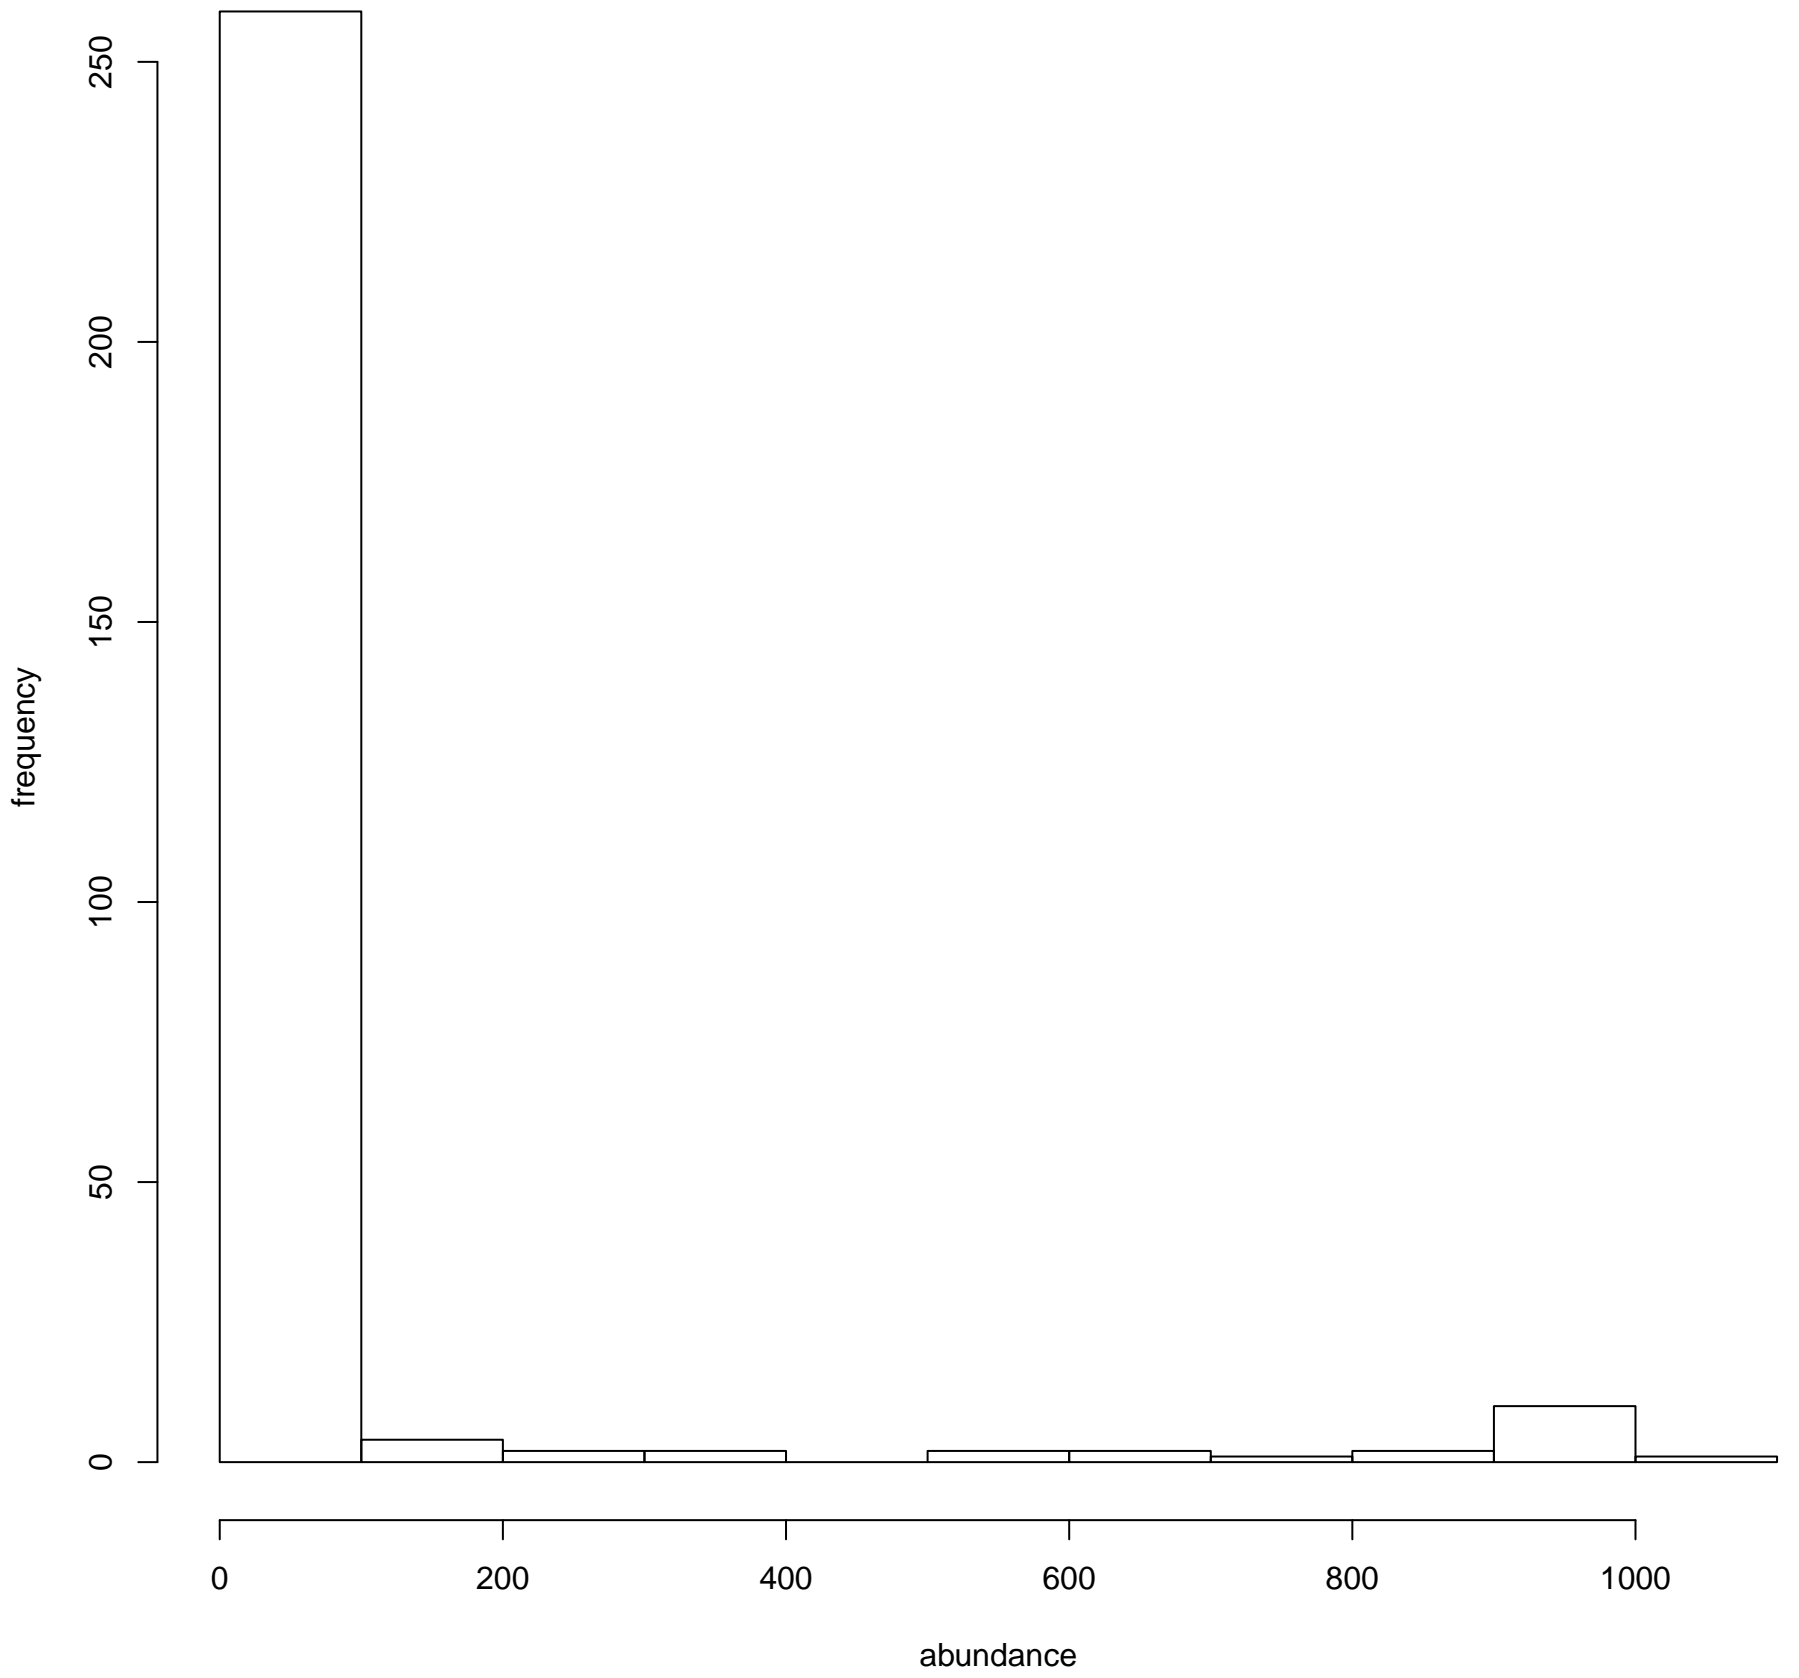

L.je

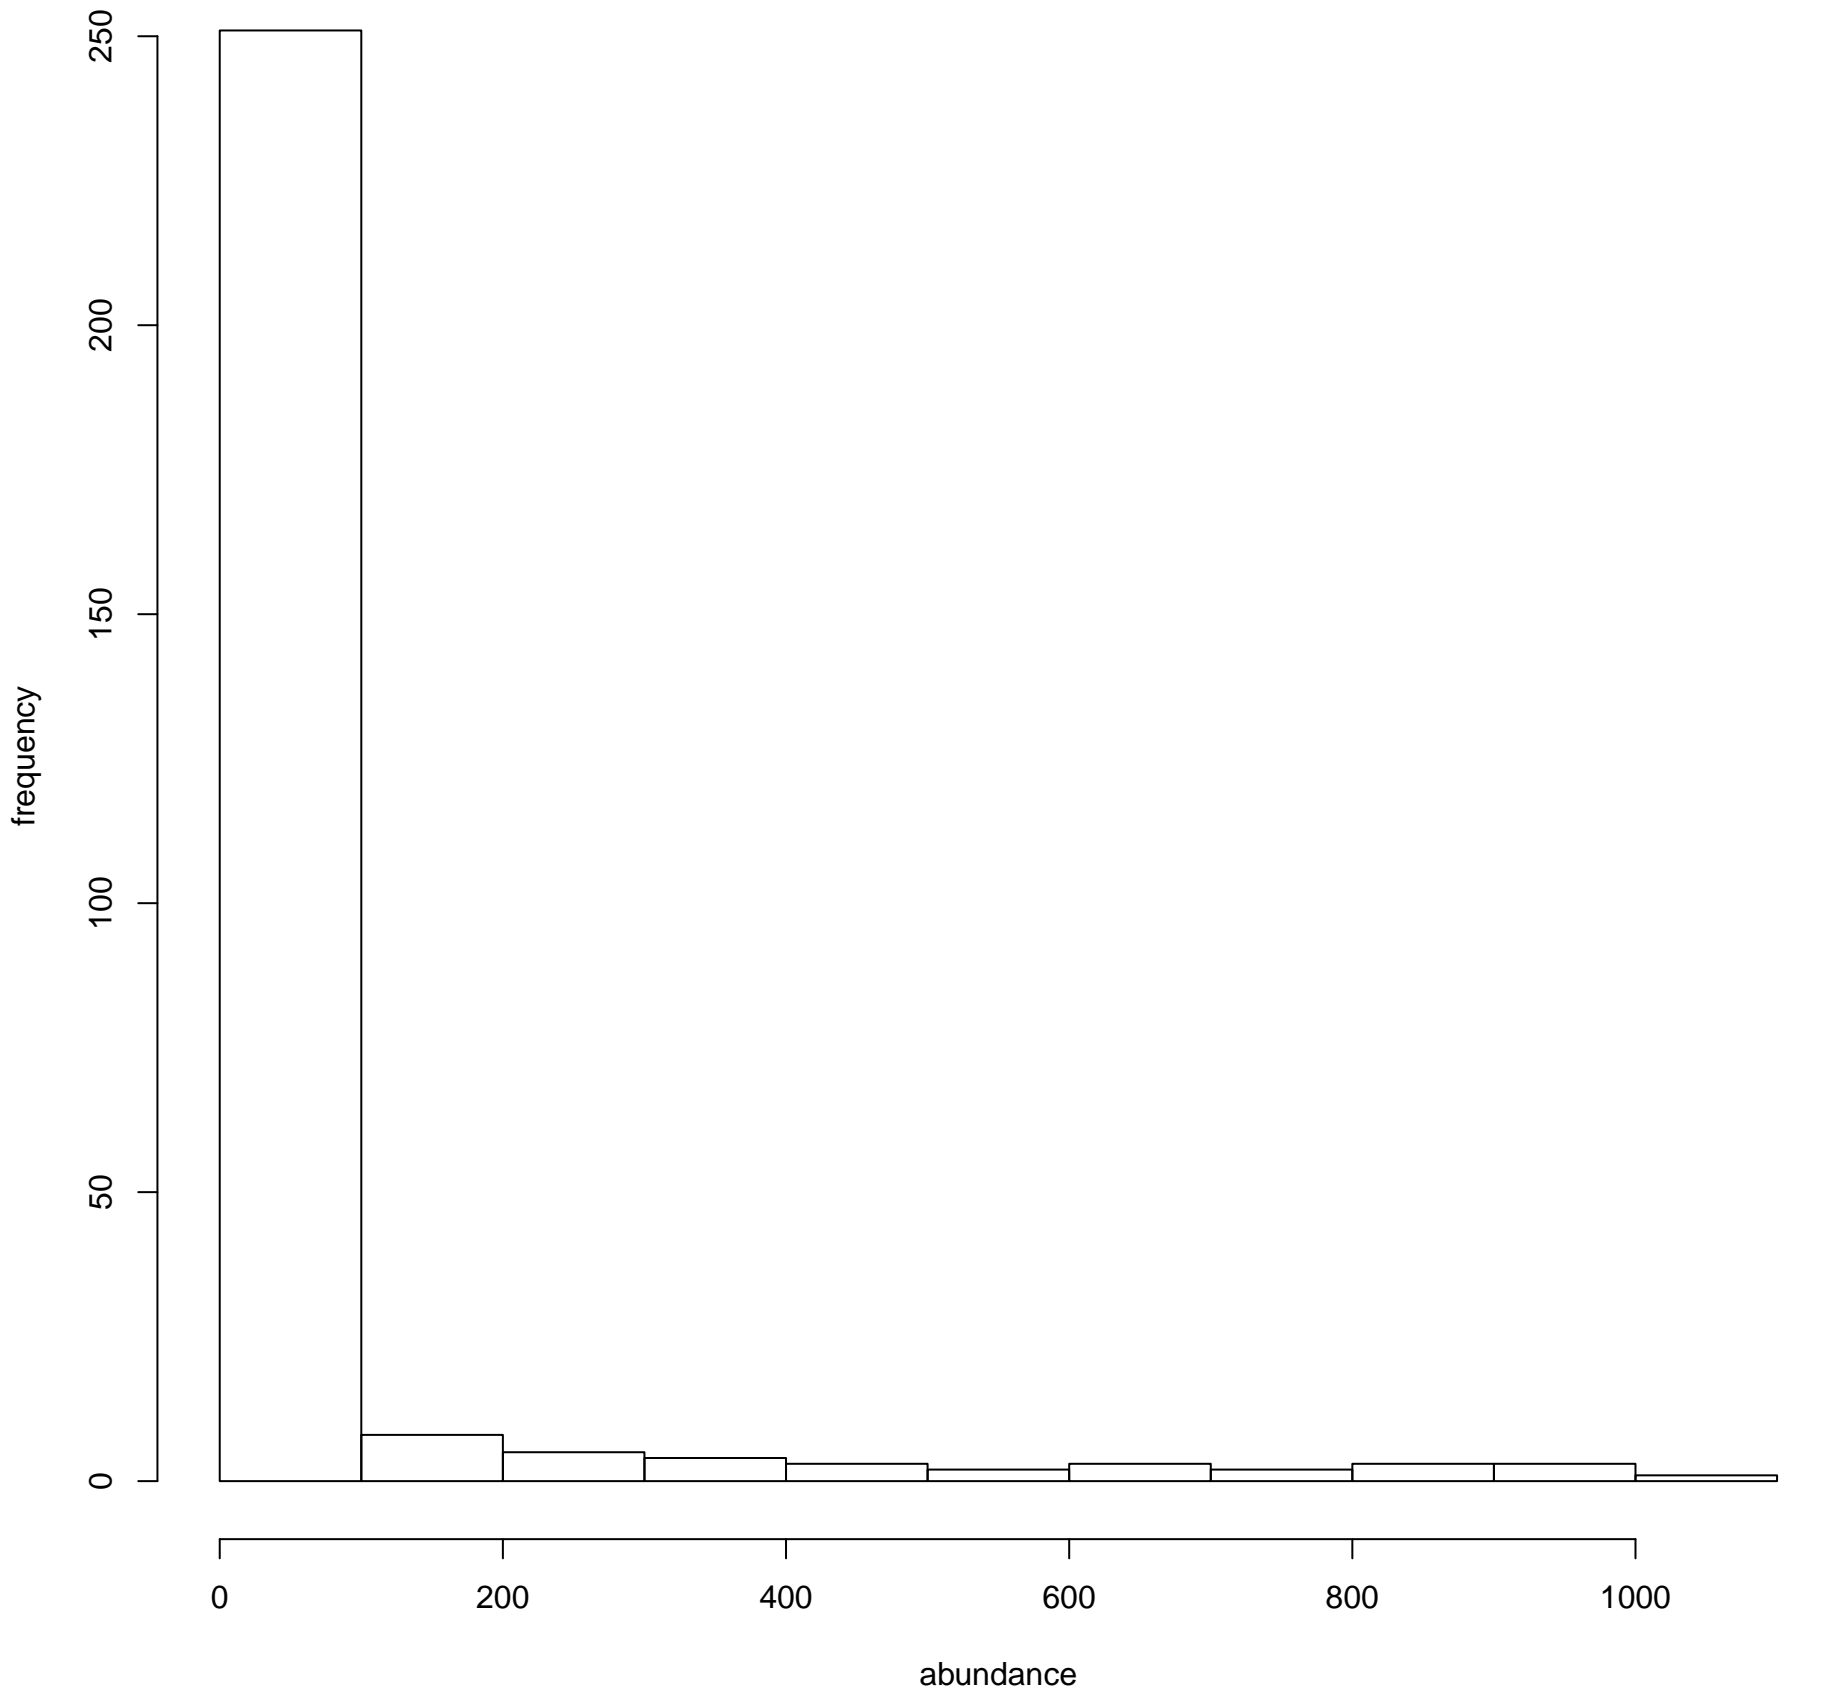

Prev

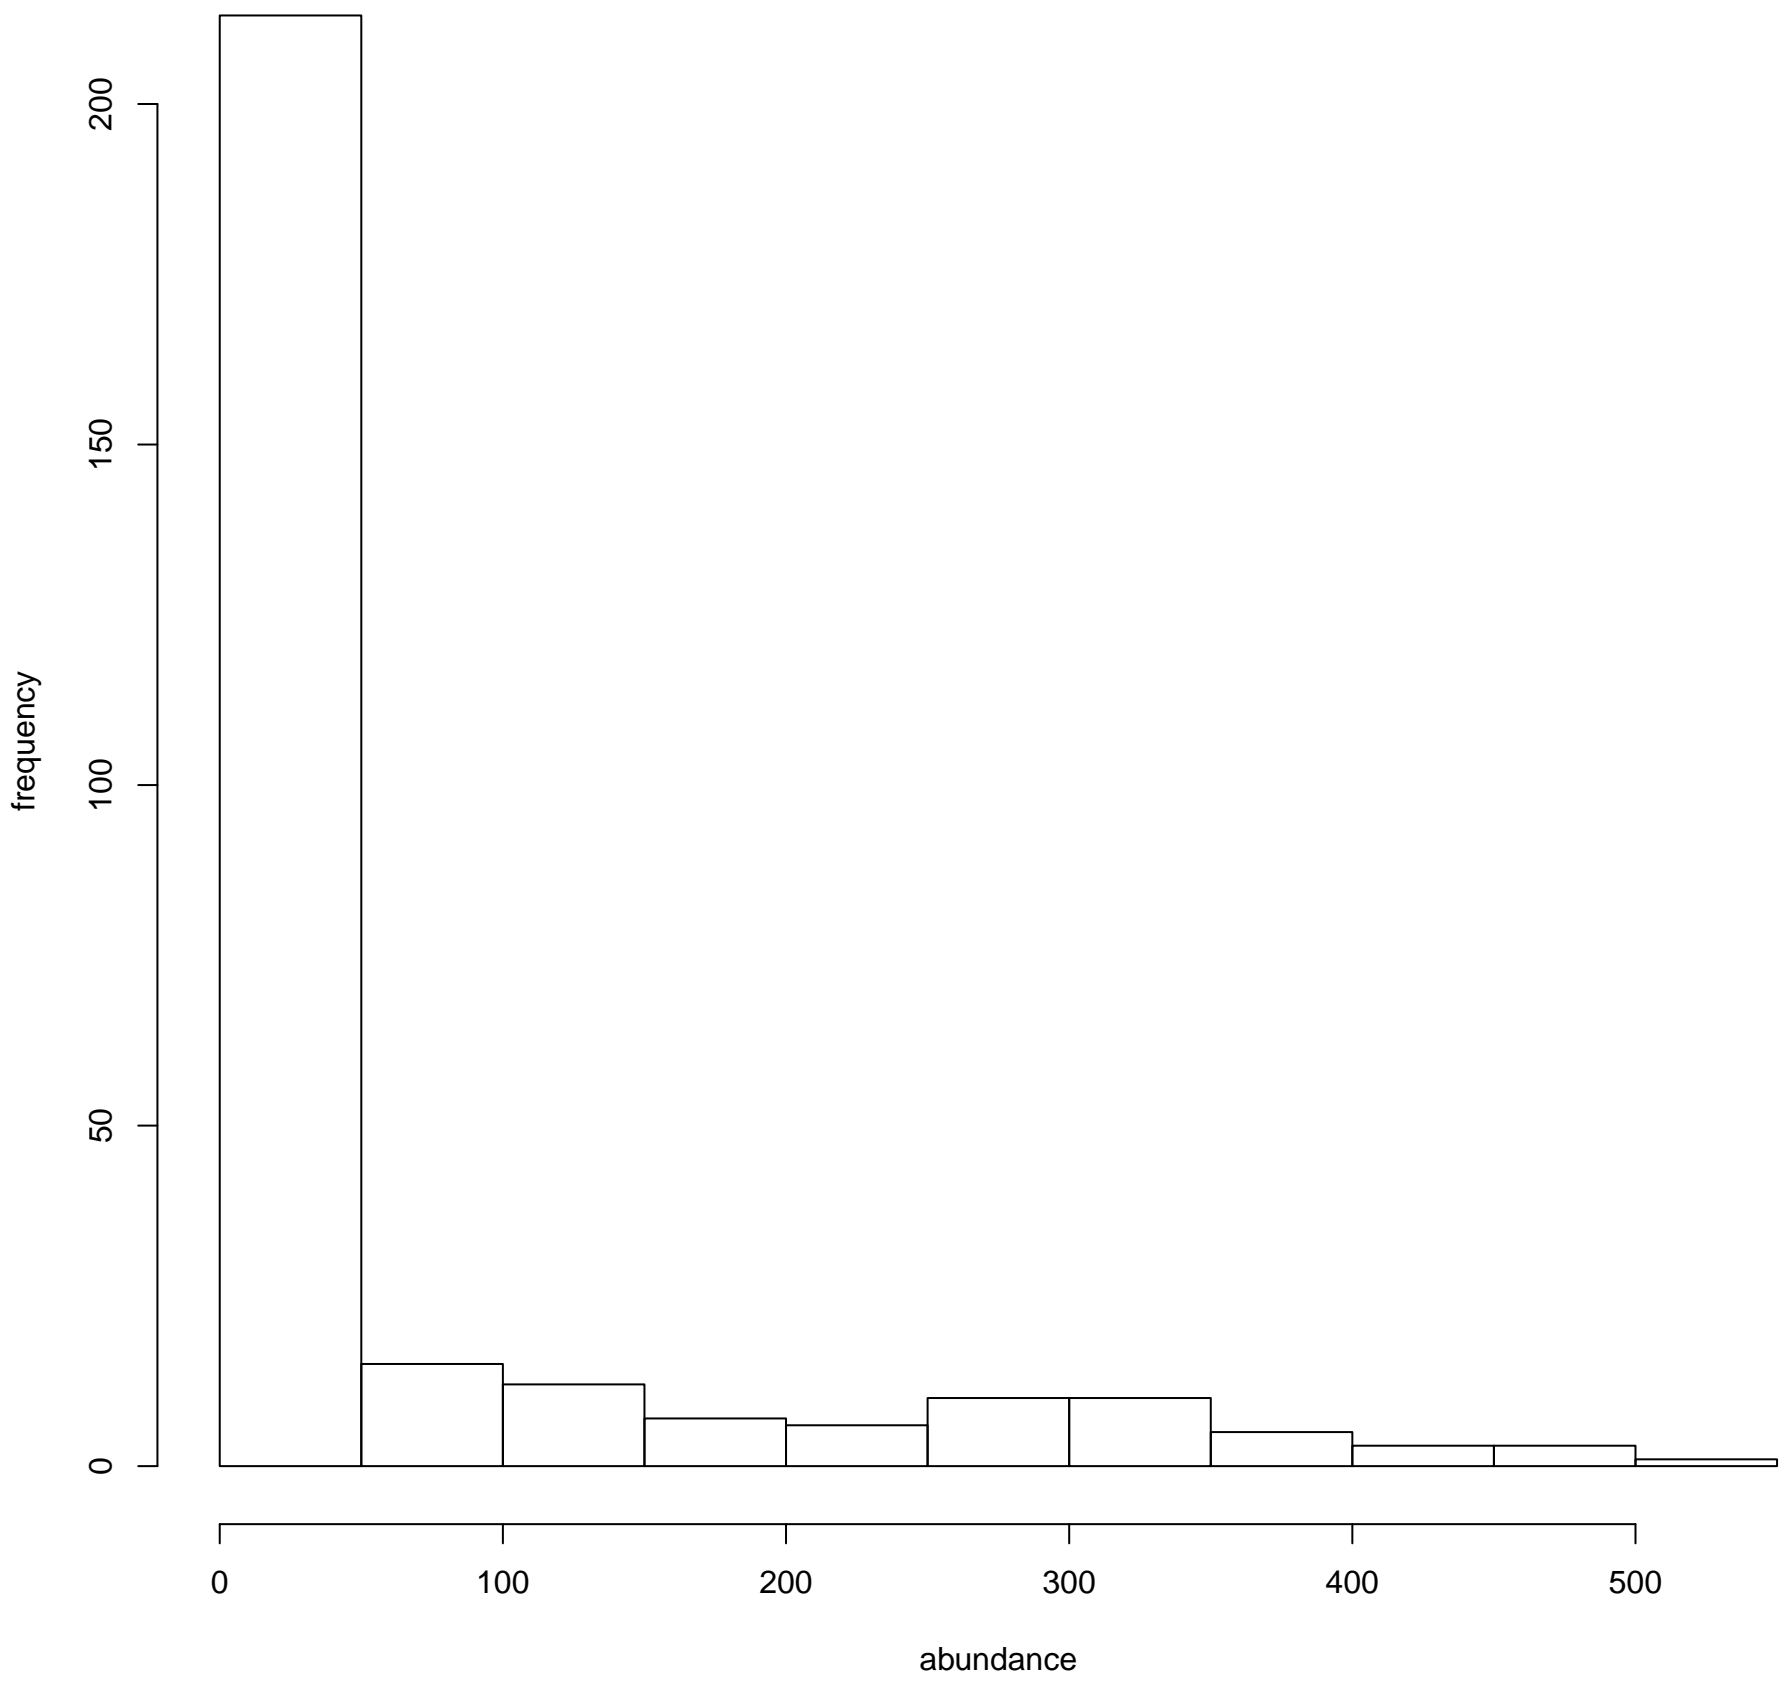

# Megas

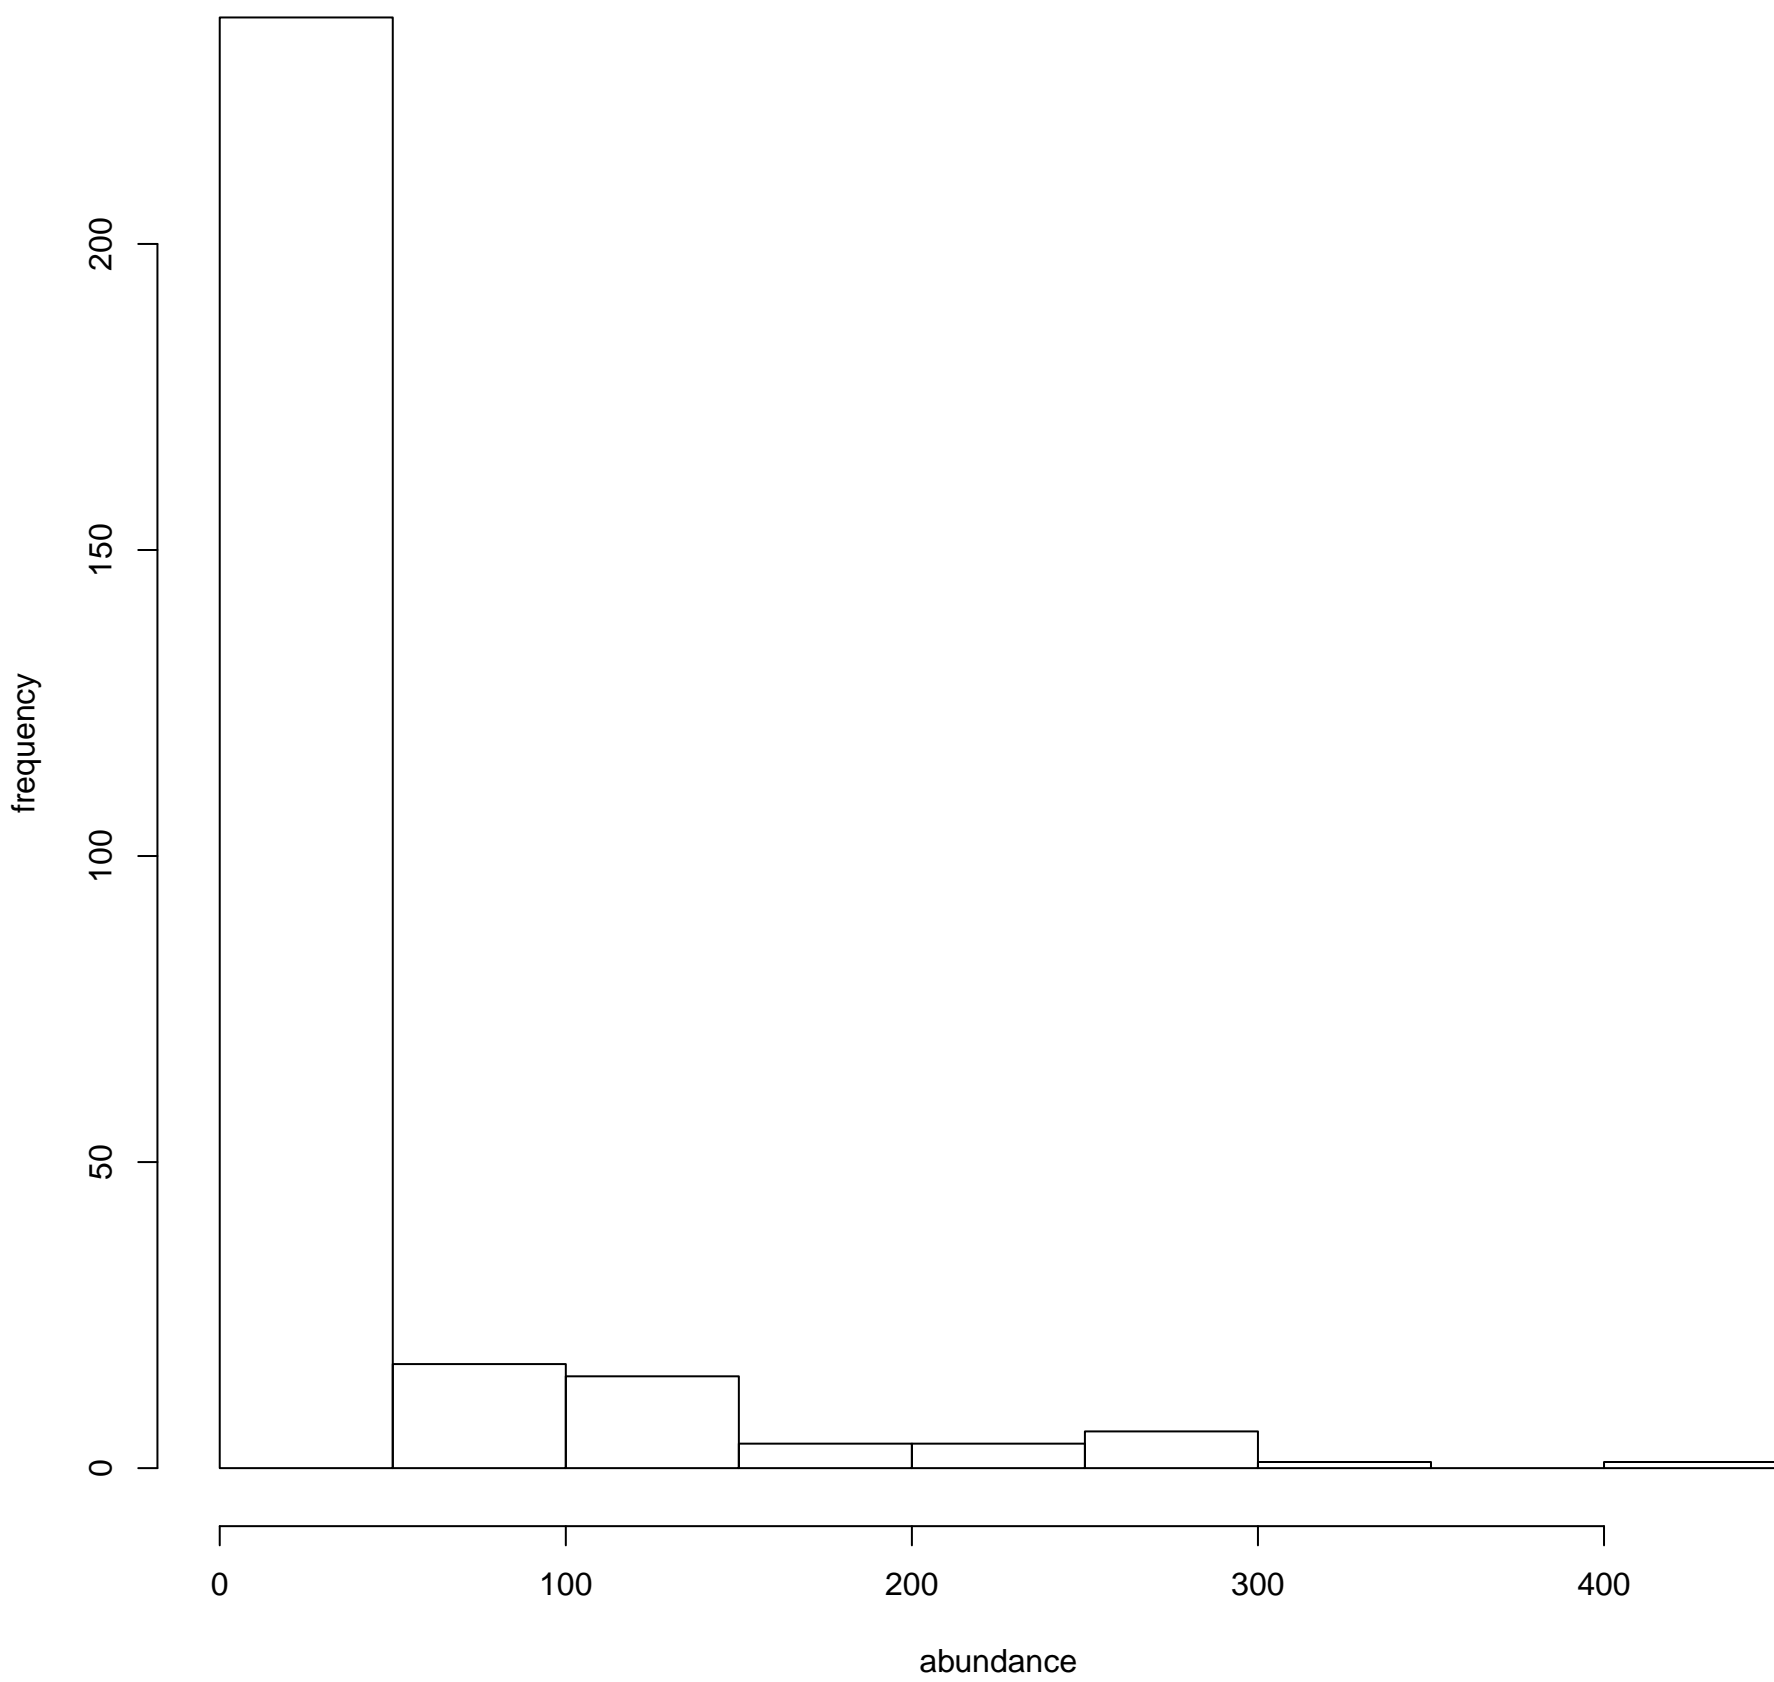

# Snea

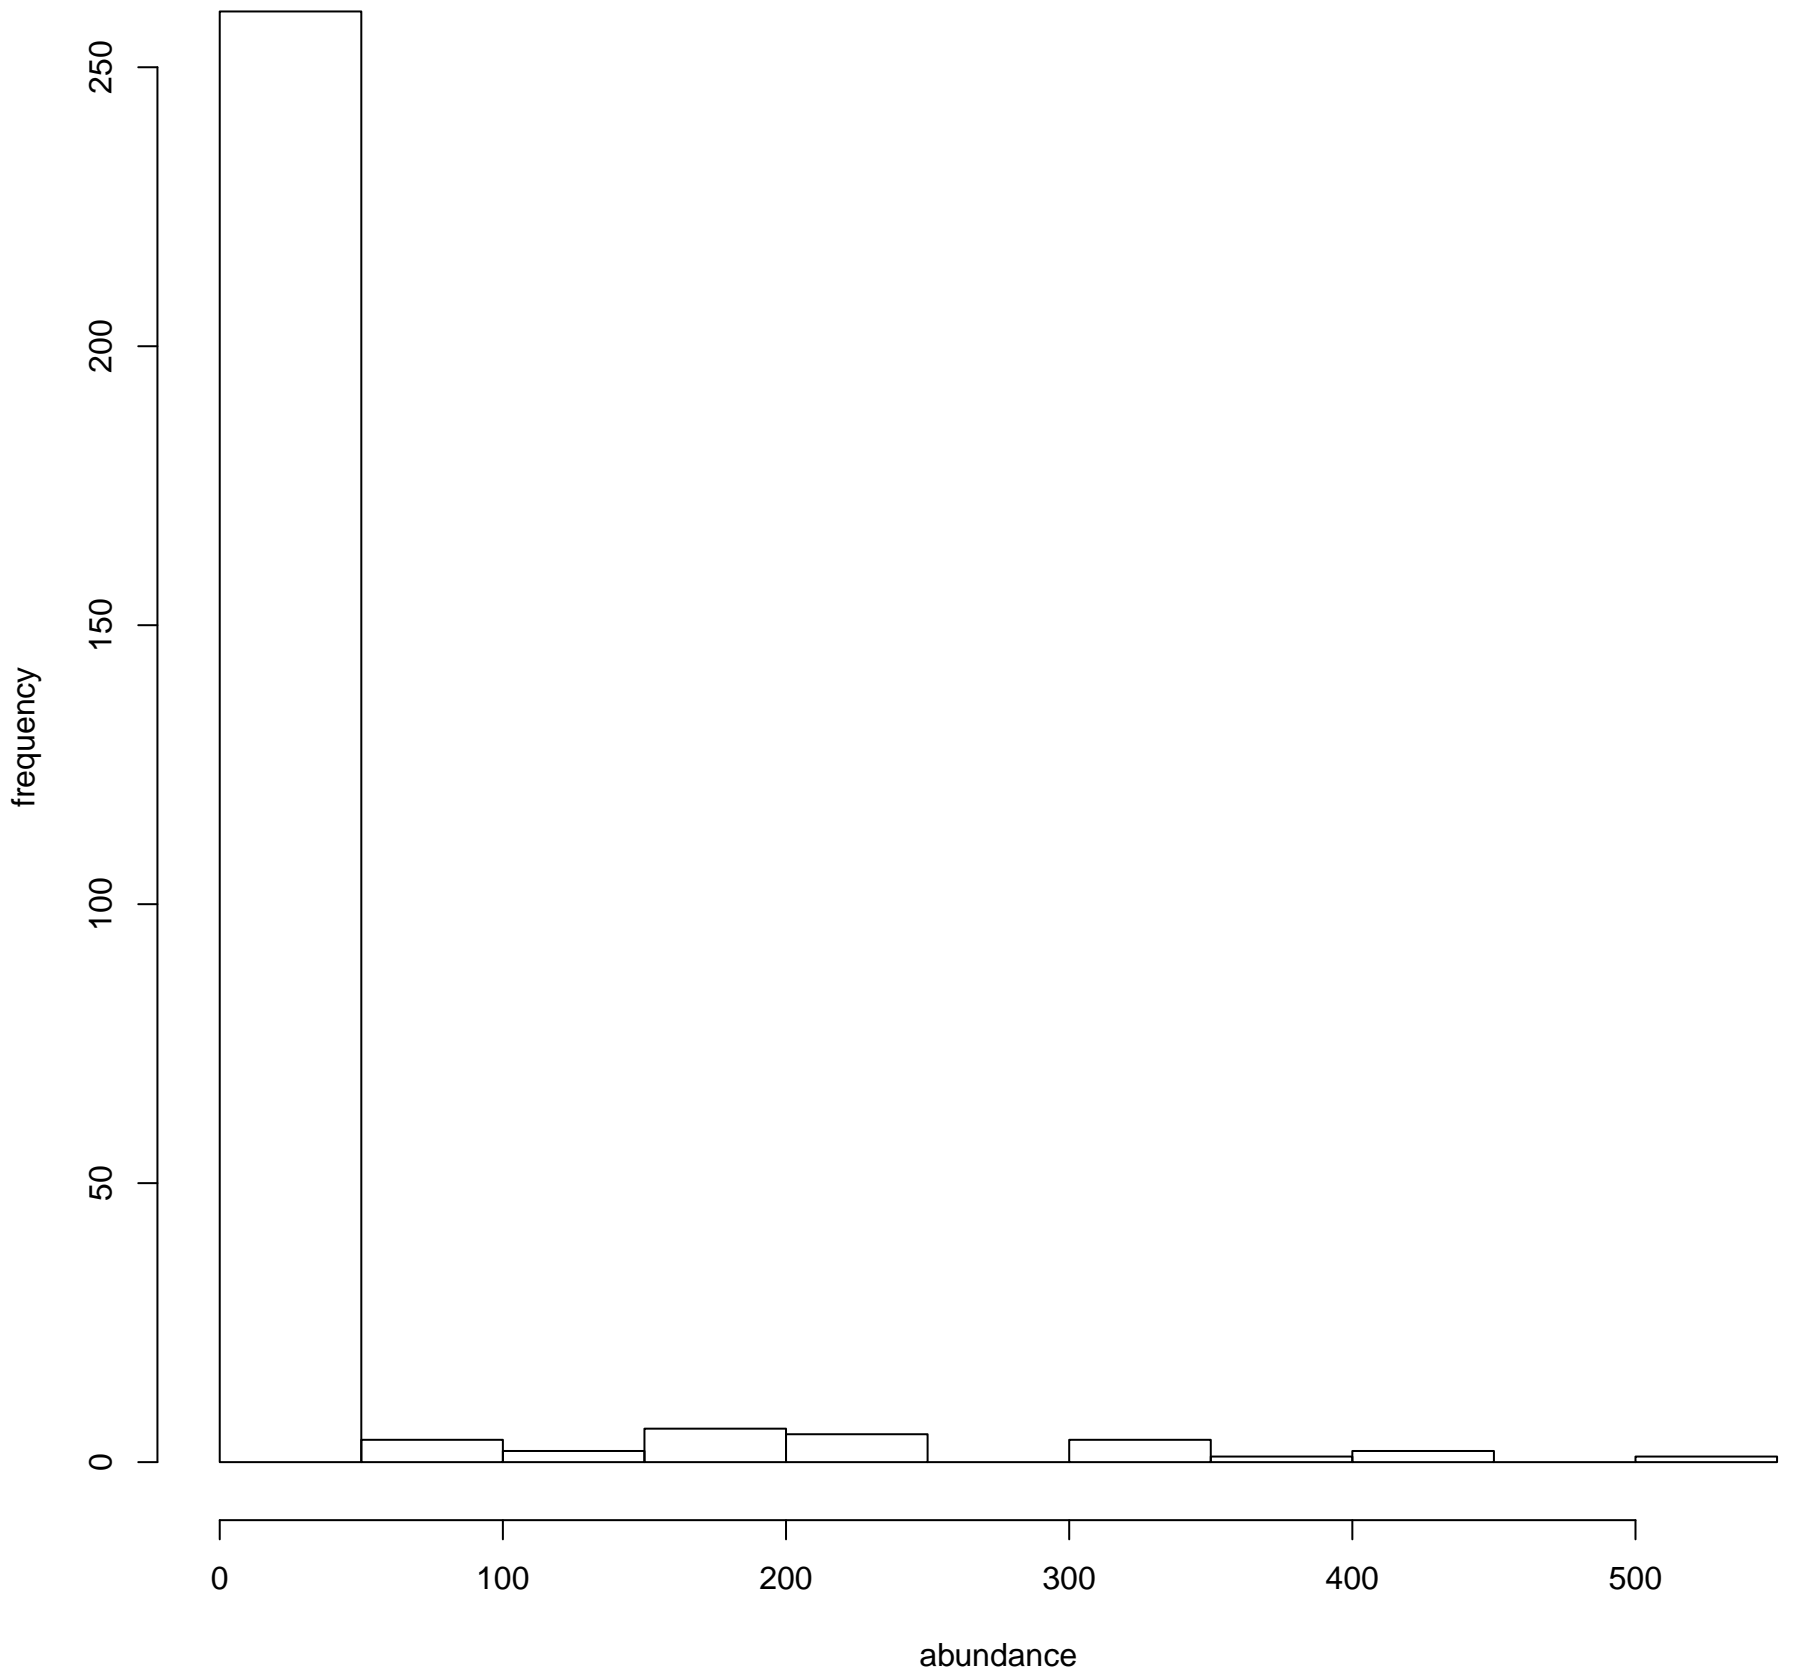

# Atpo.bium

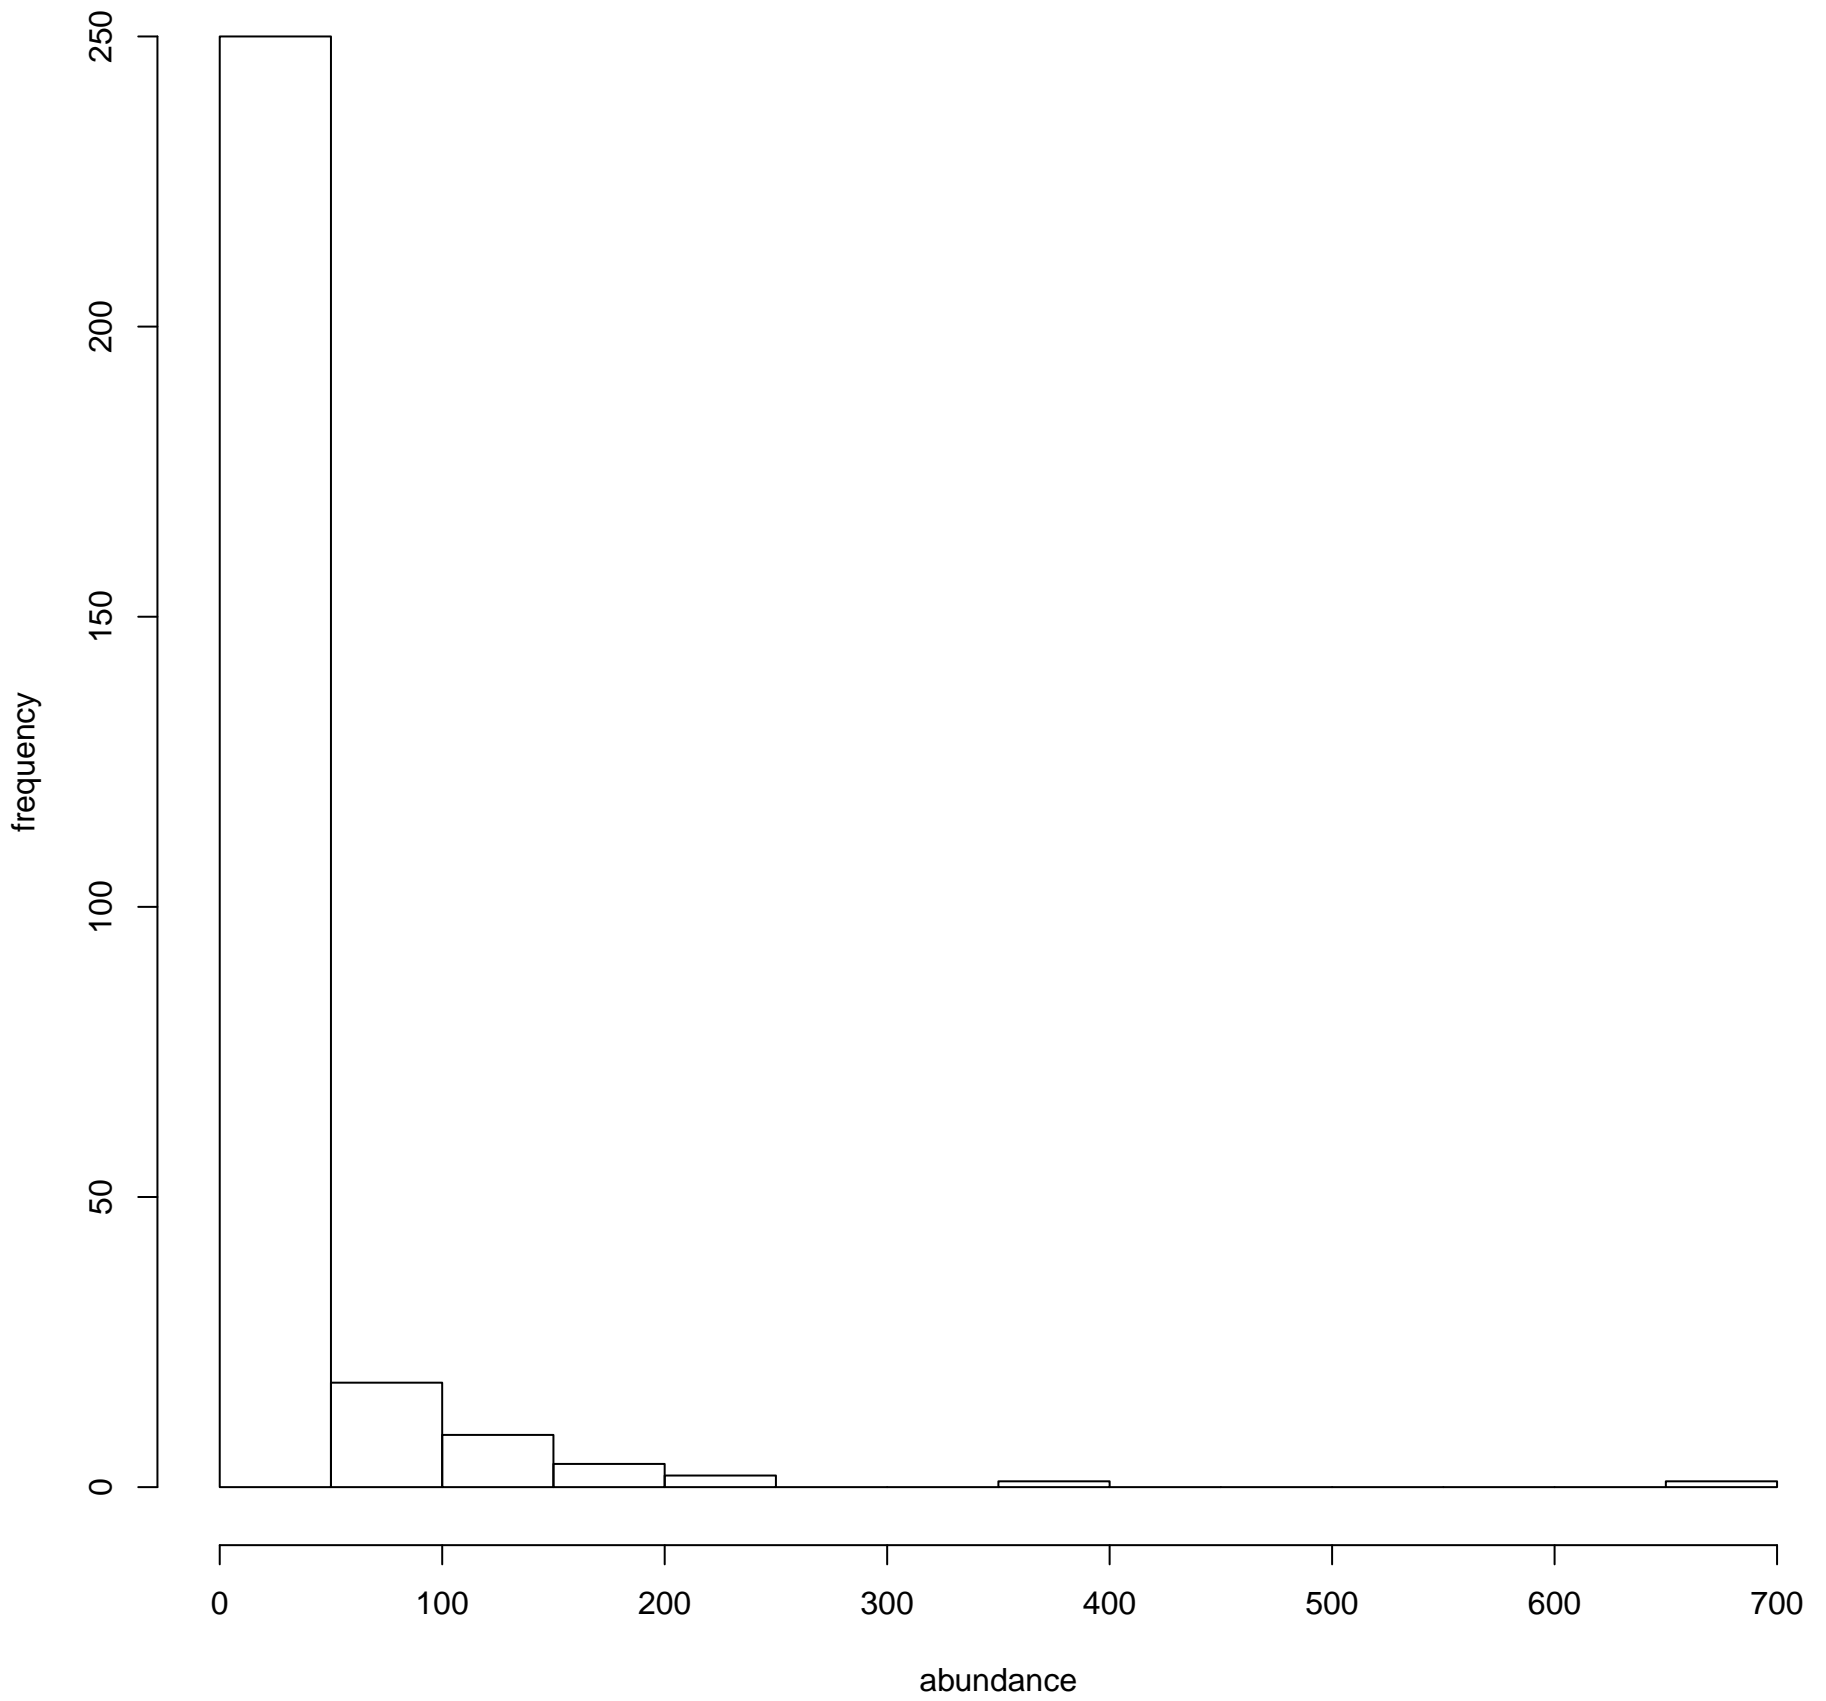



# Stre

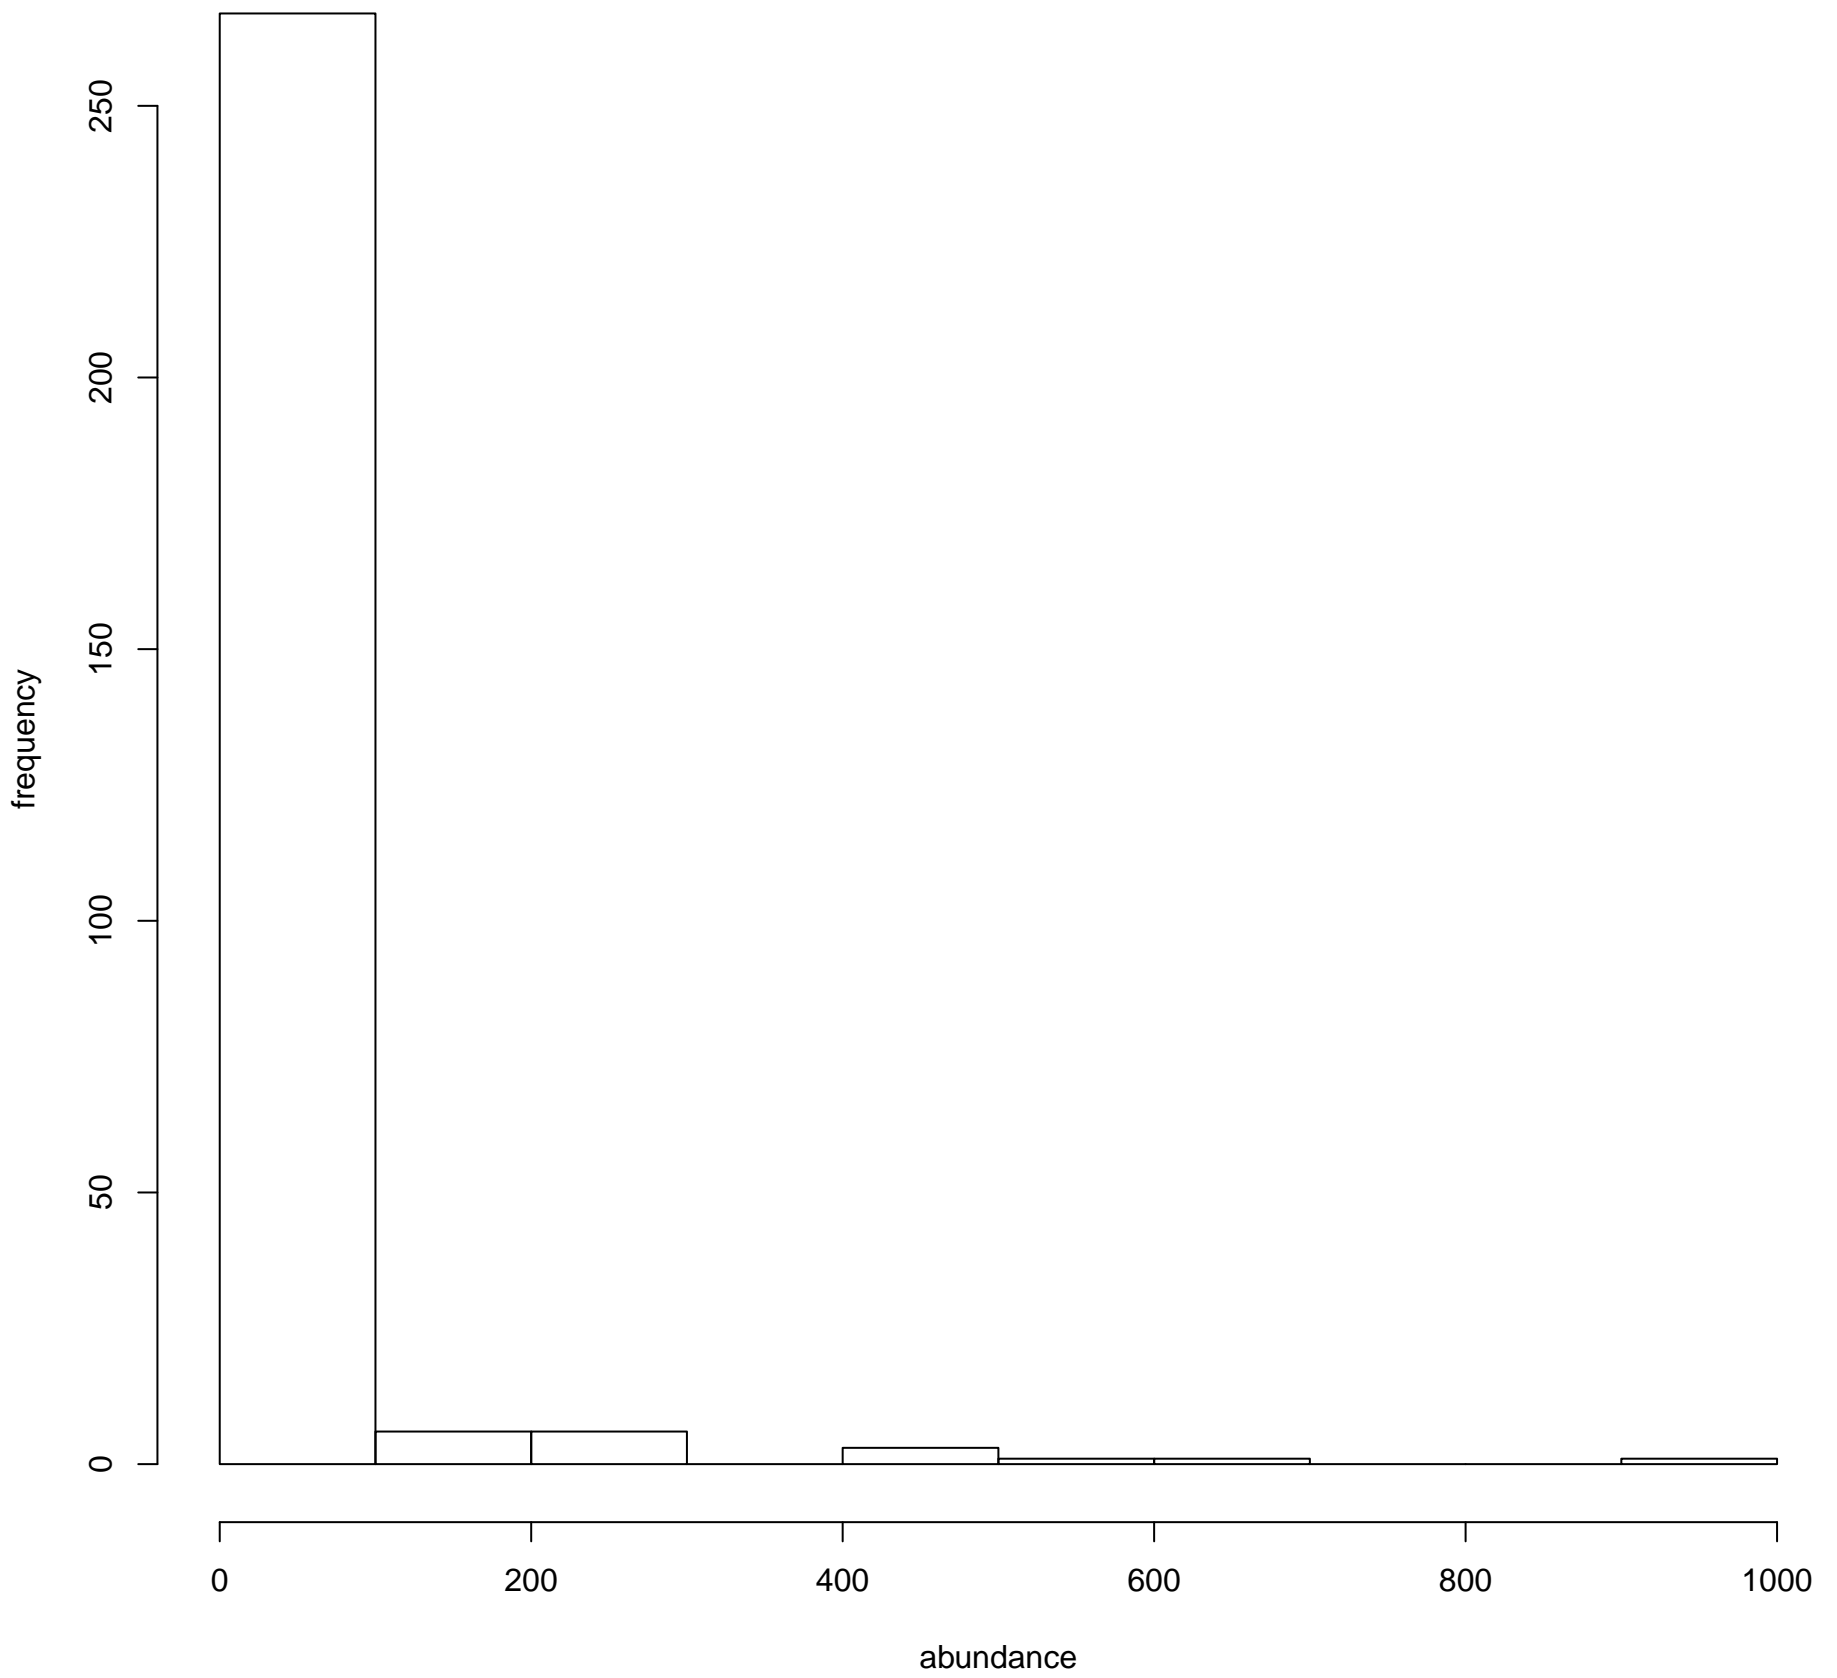

# Dial

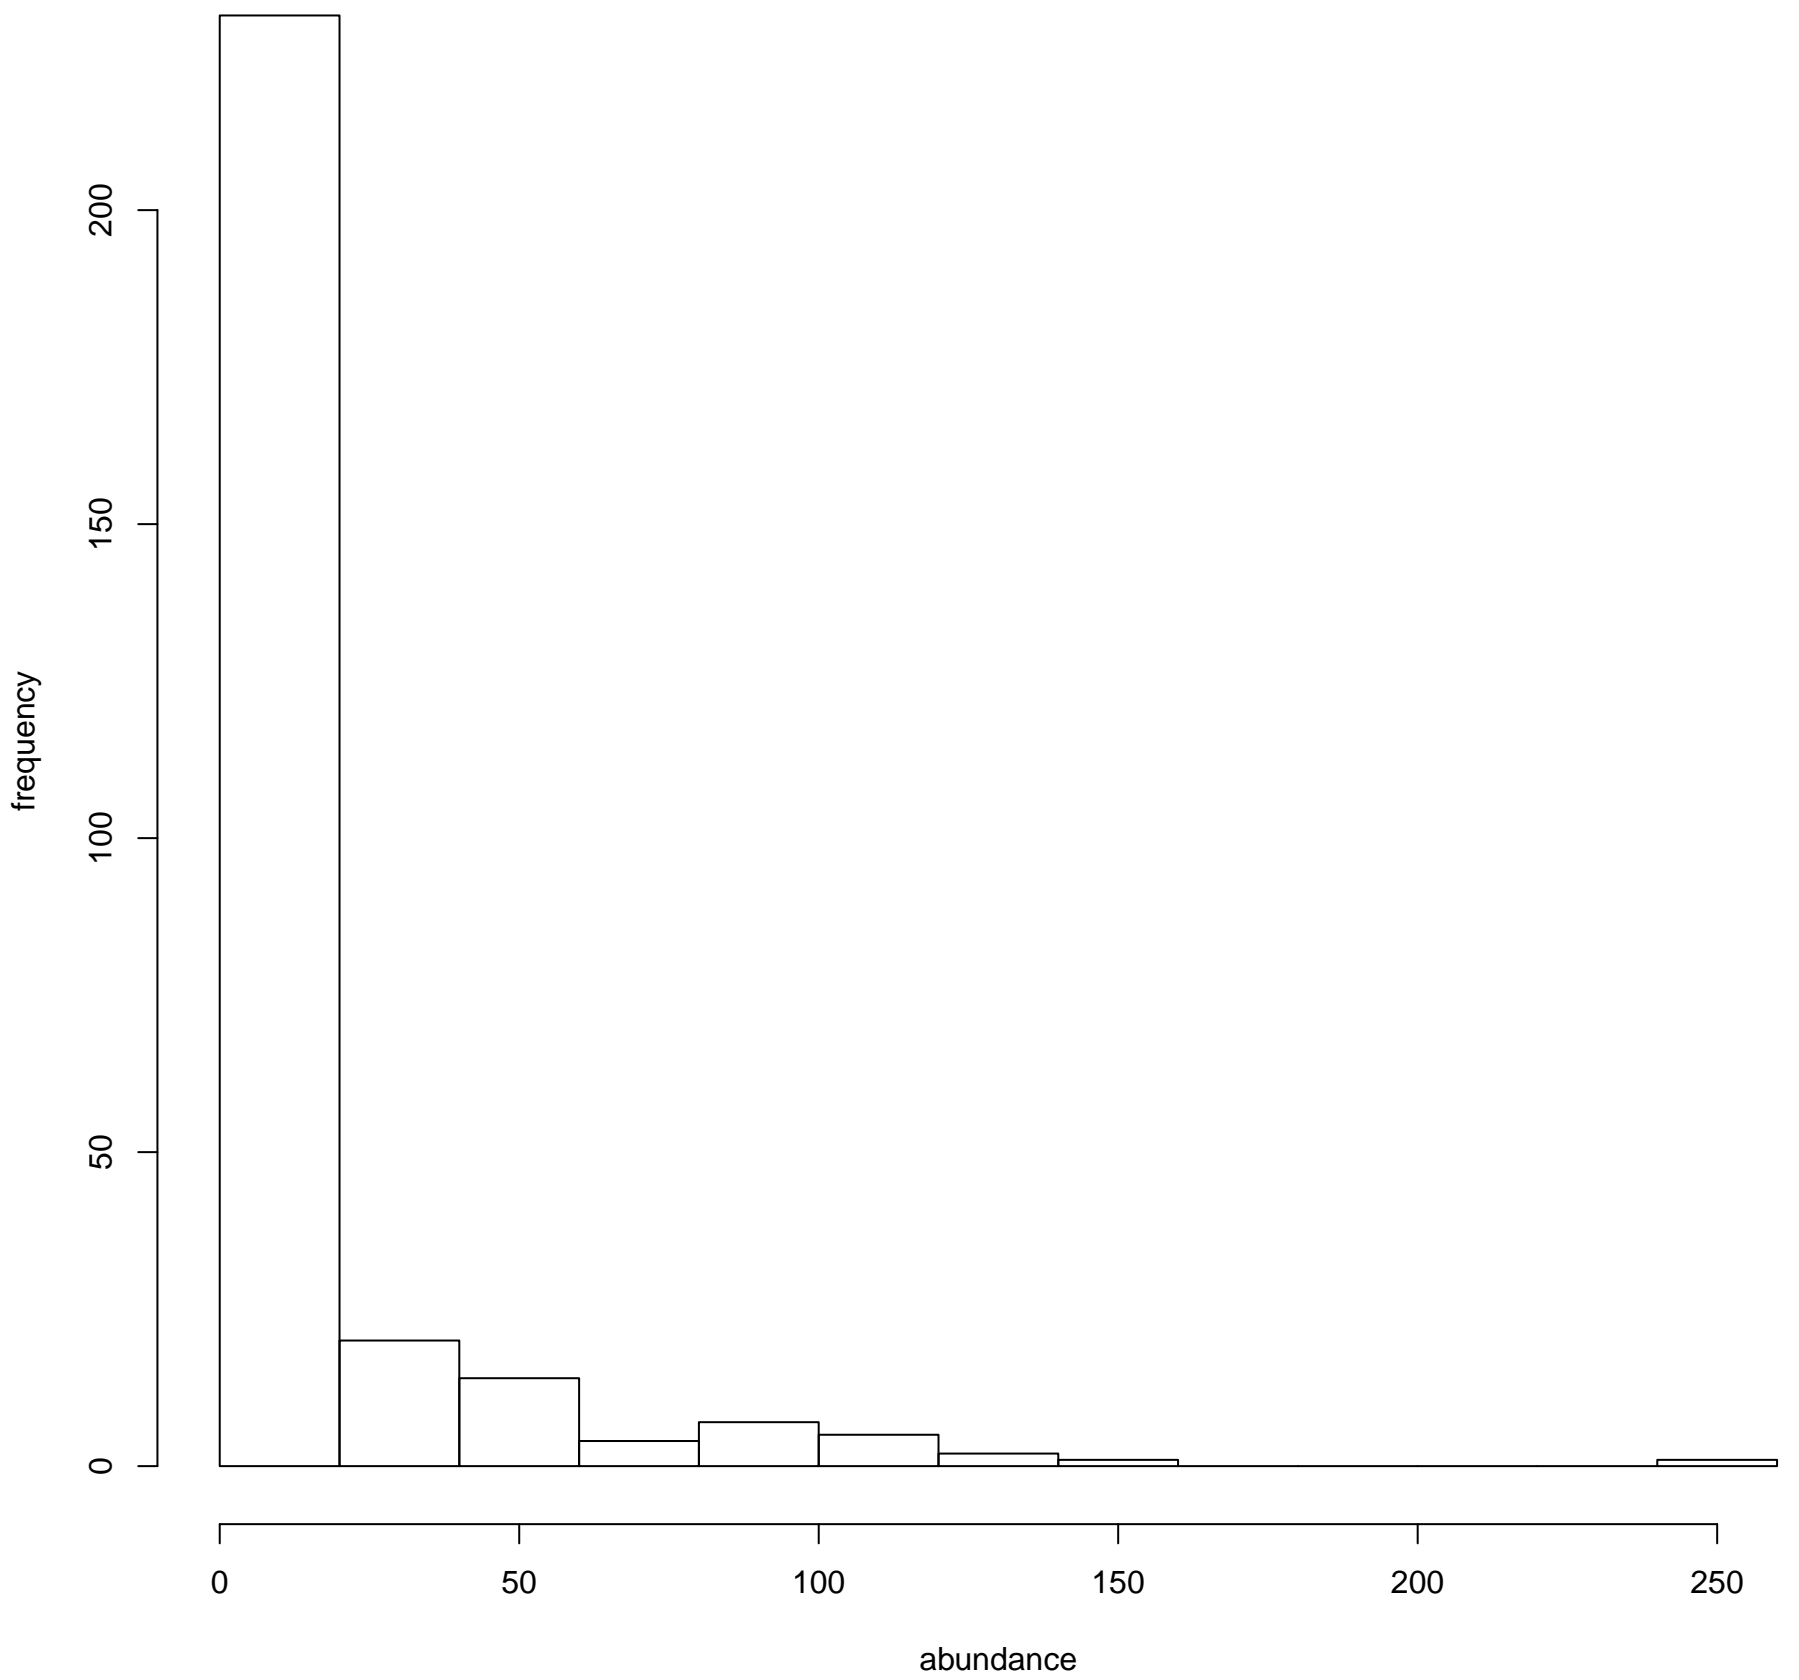

# Lachno.8

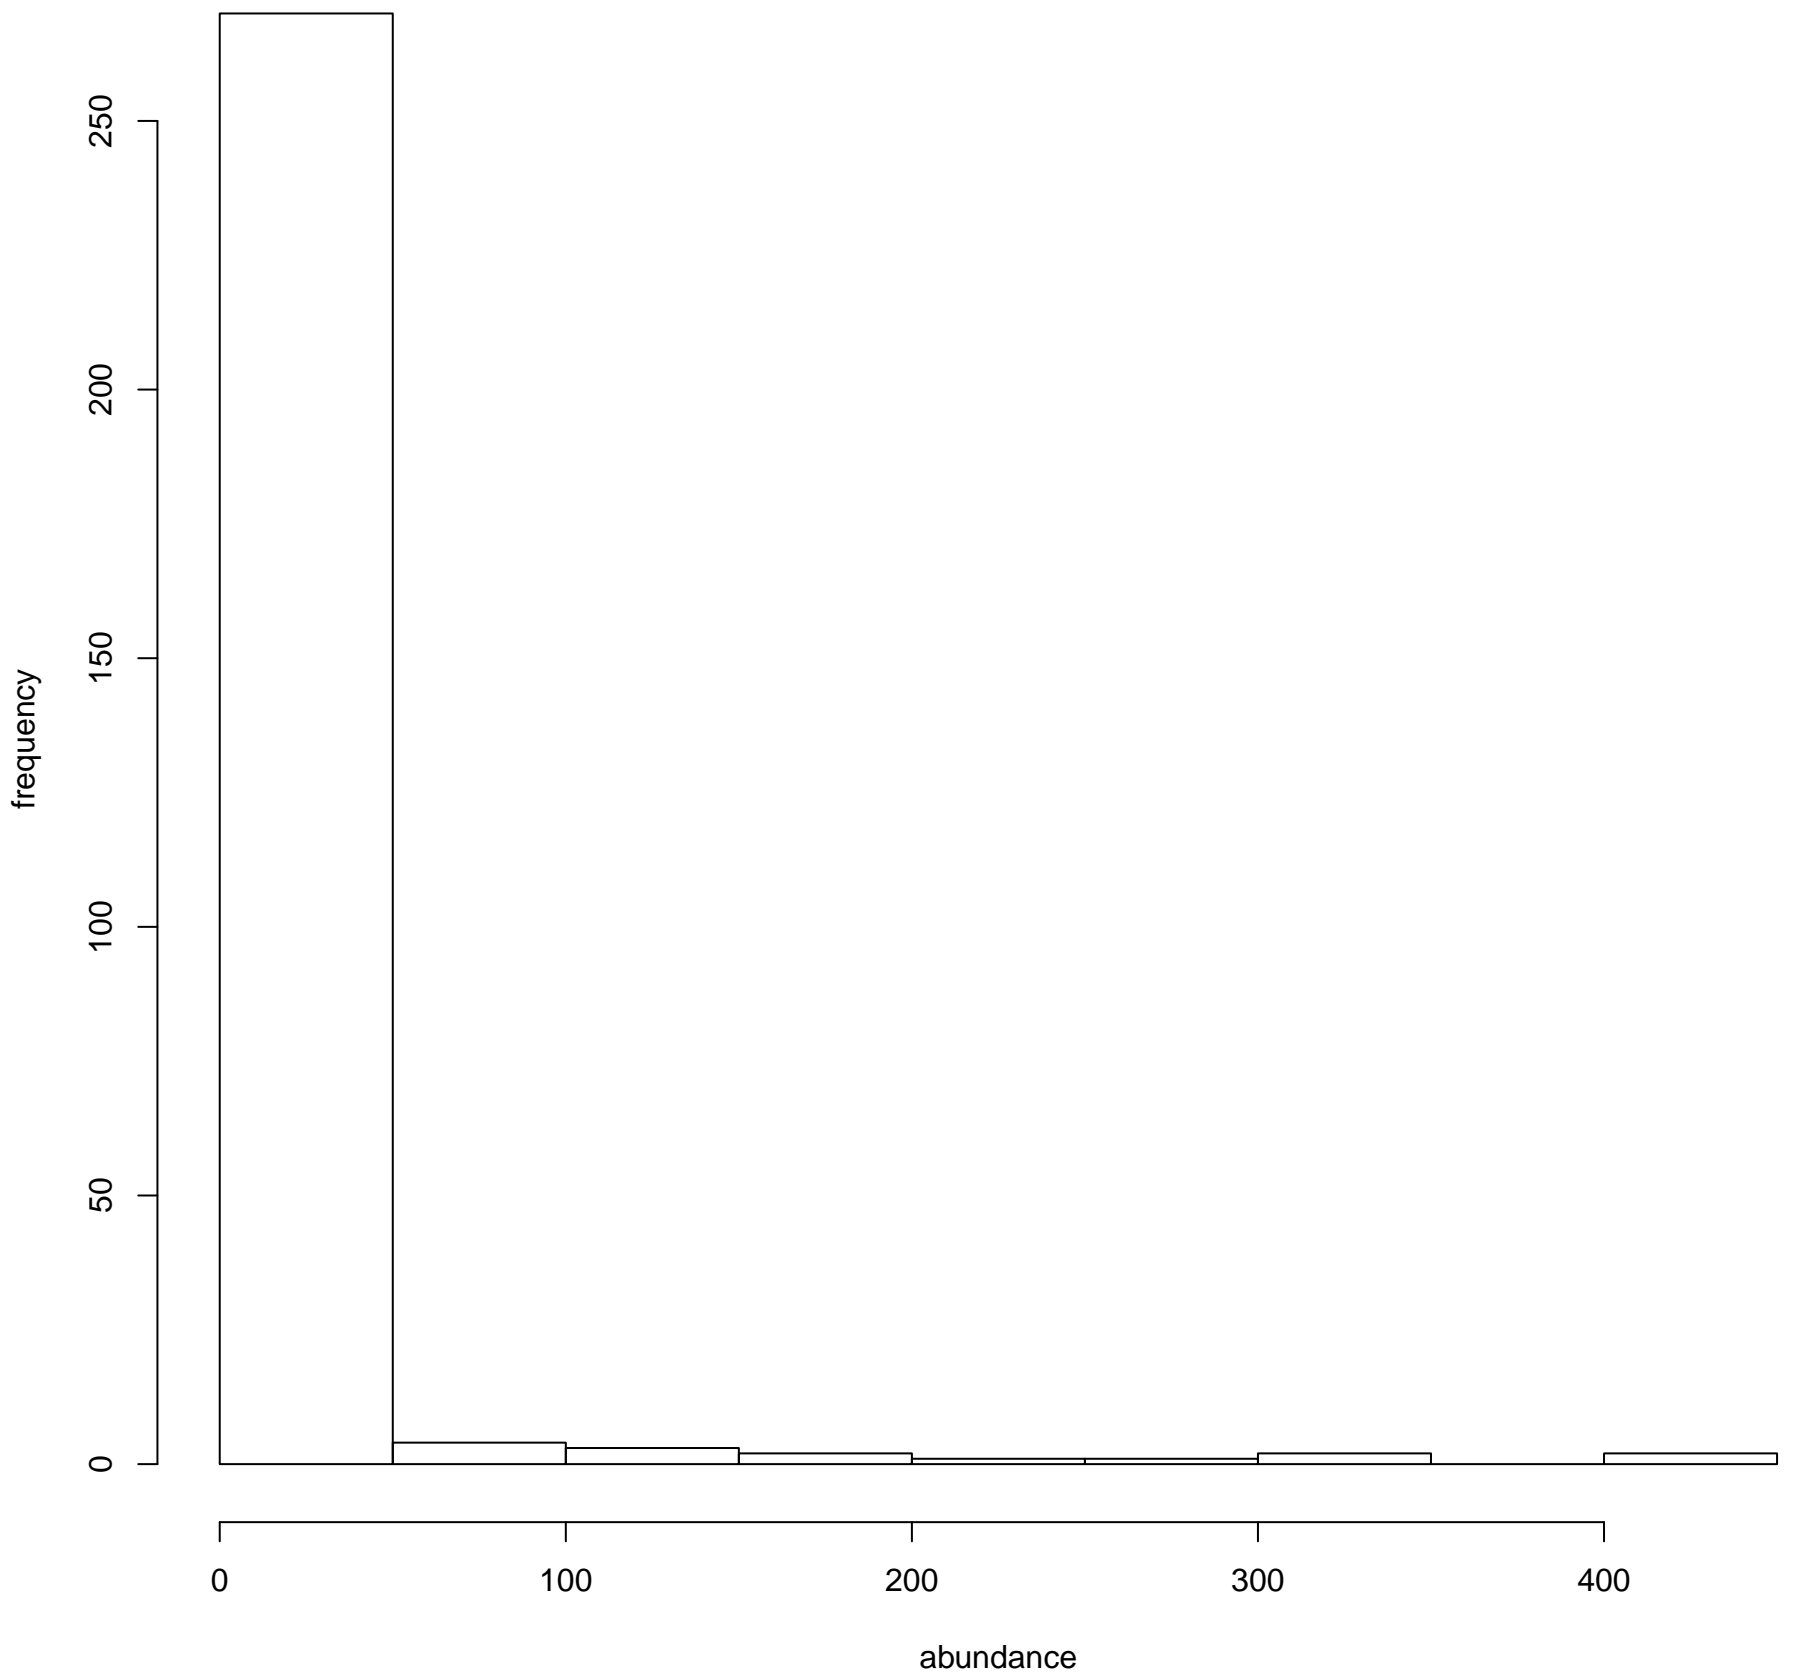

# Anae.coc

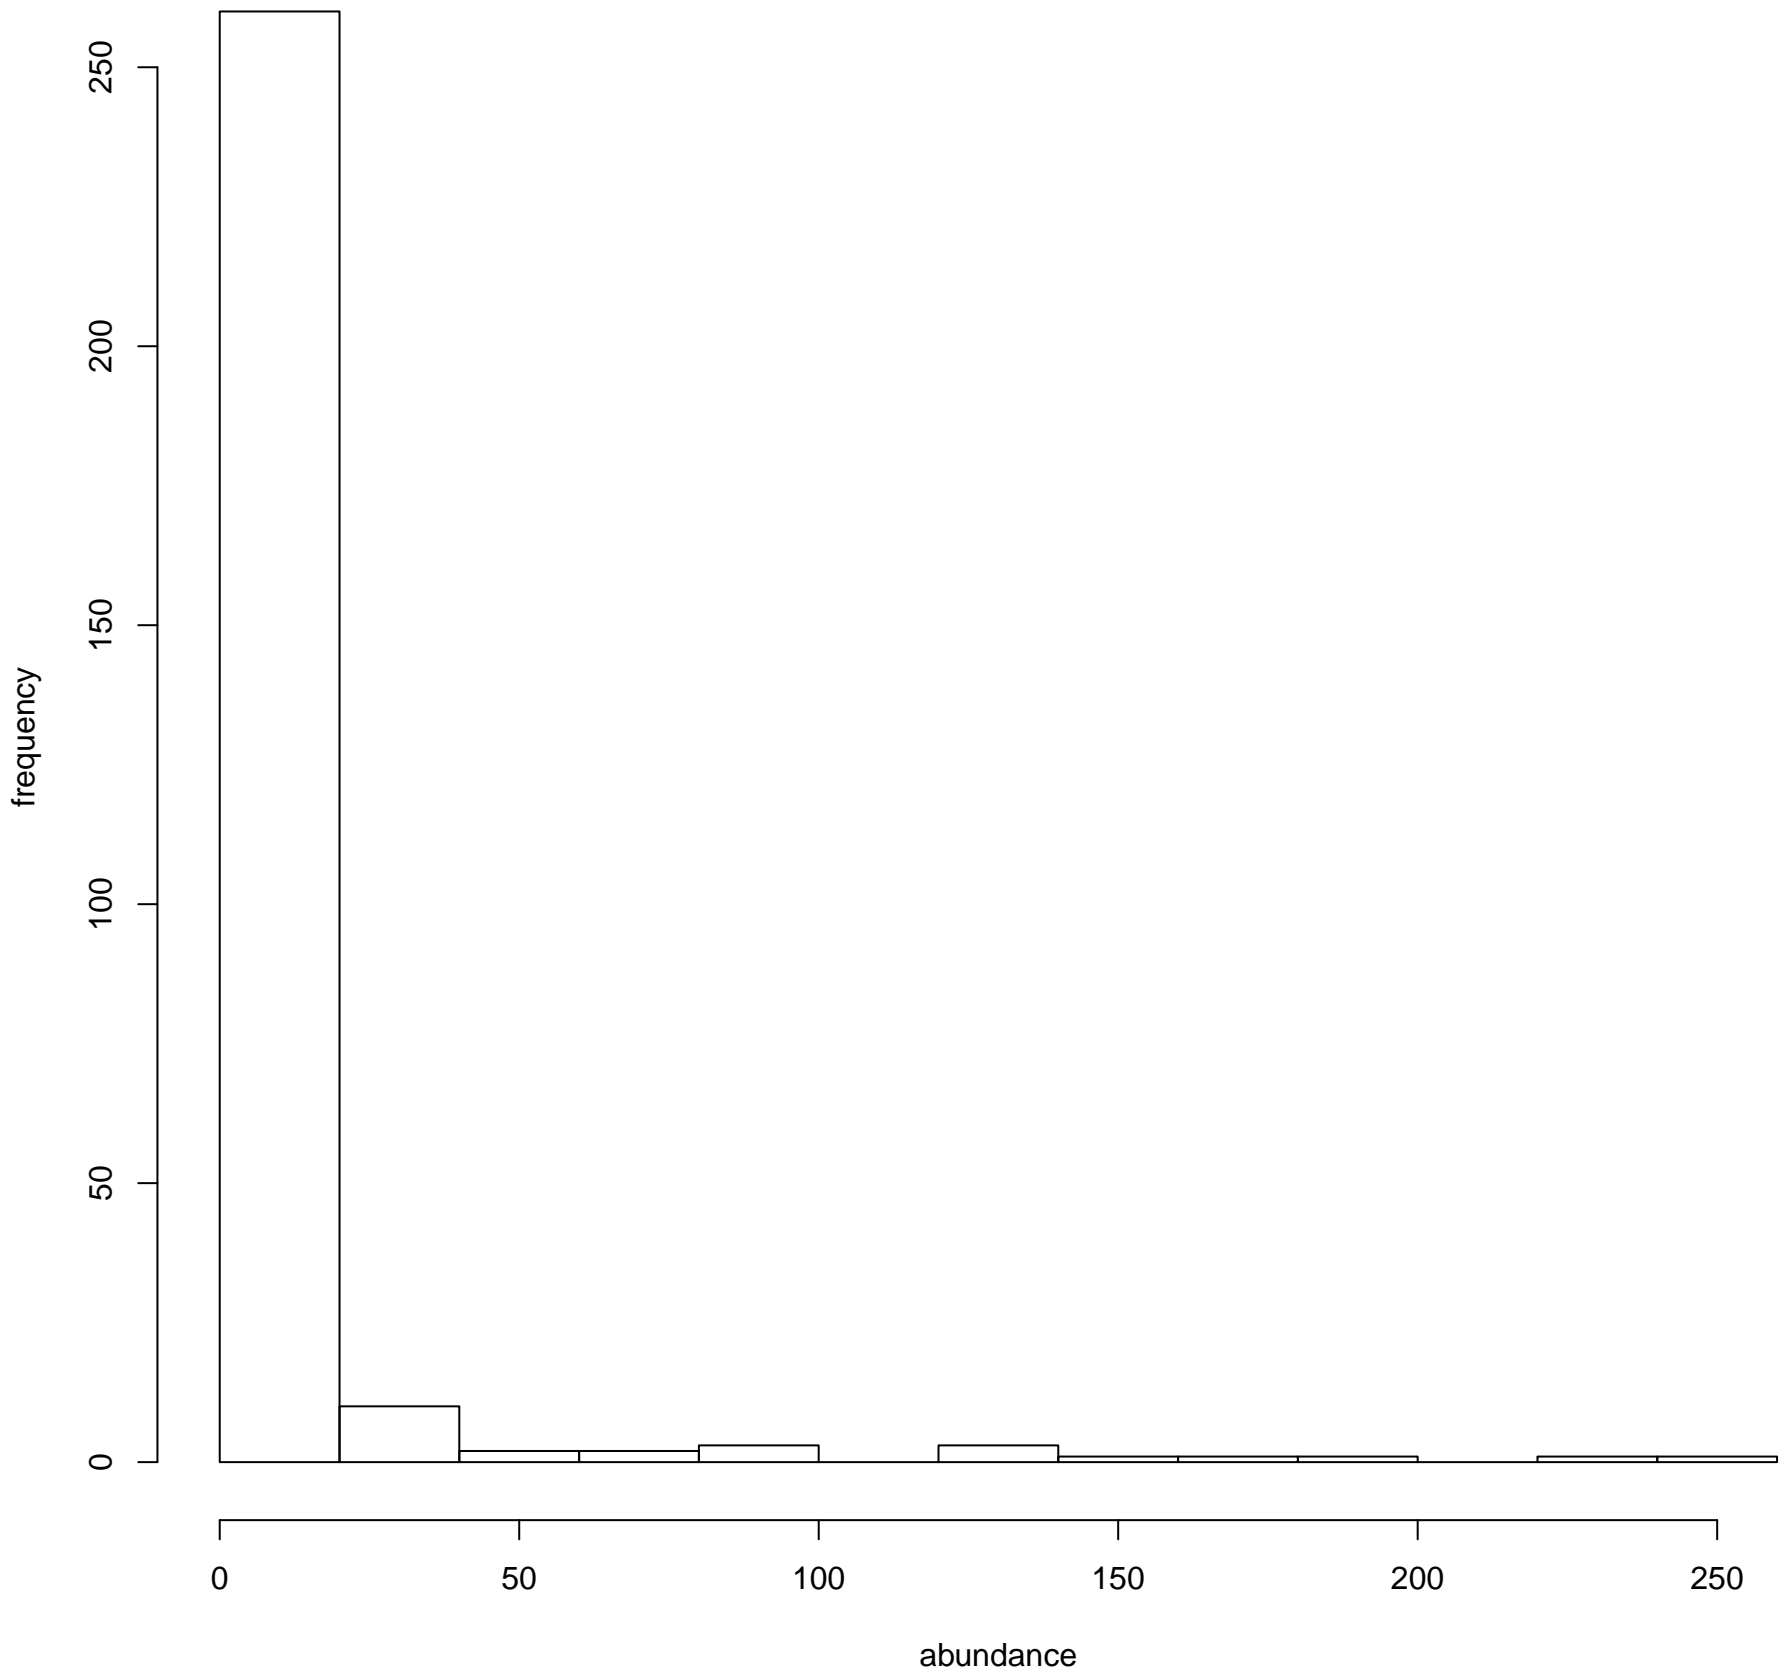

# Pep.phil

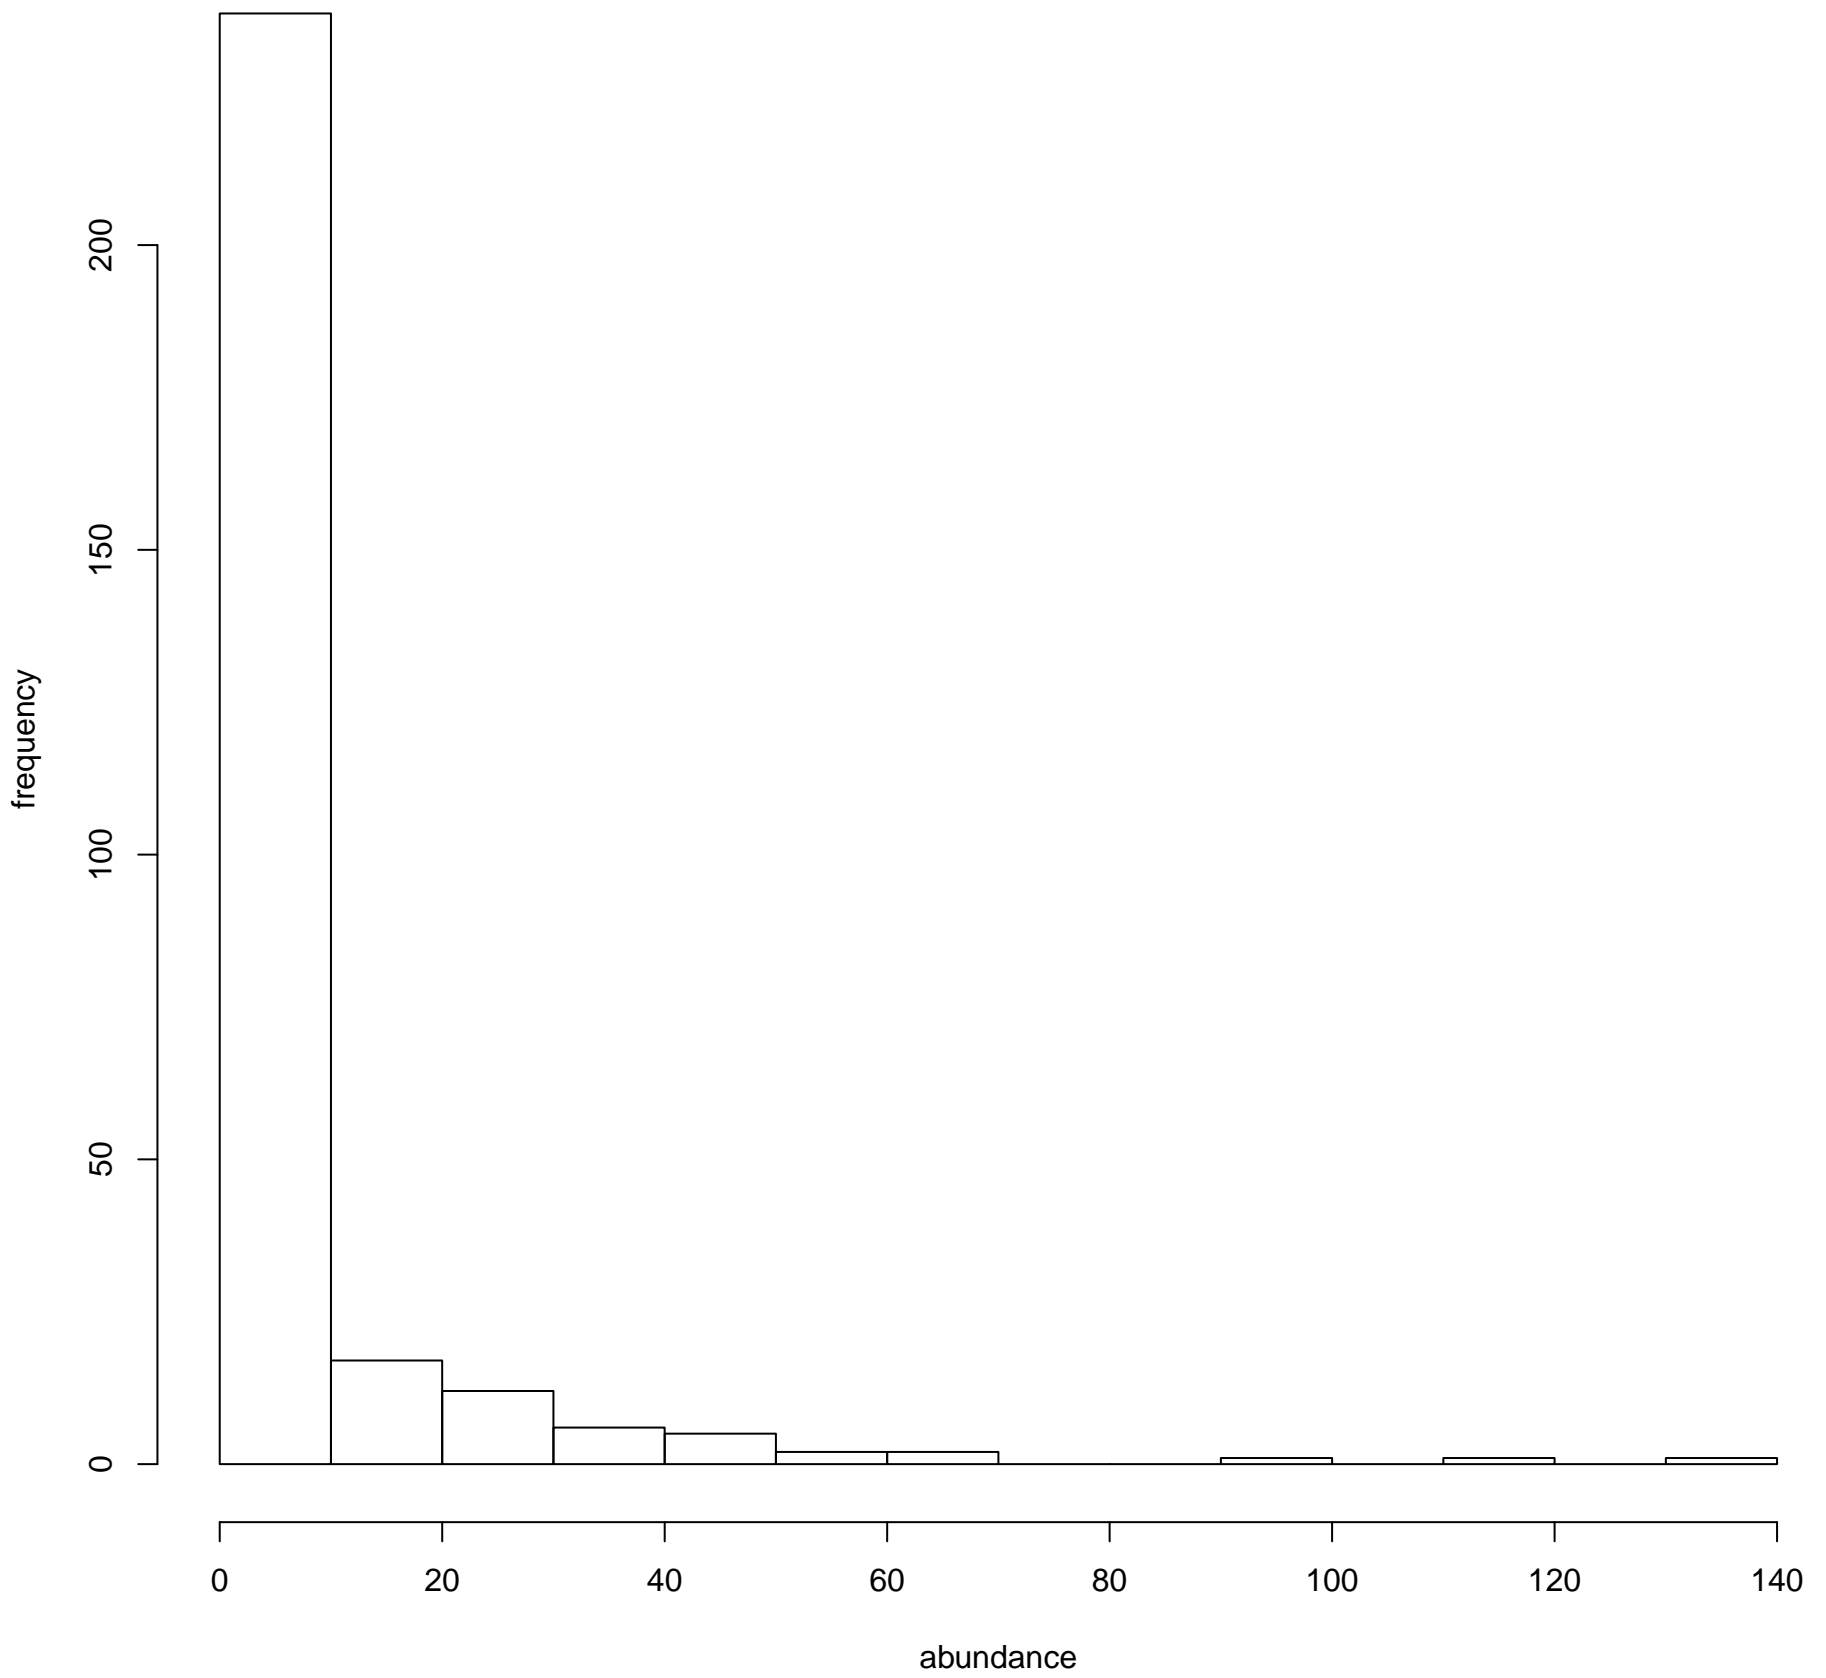

# Egge

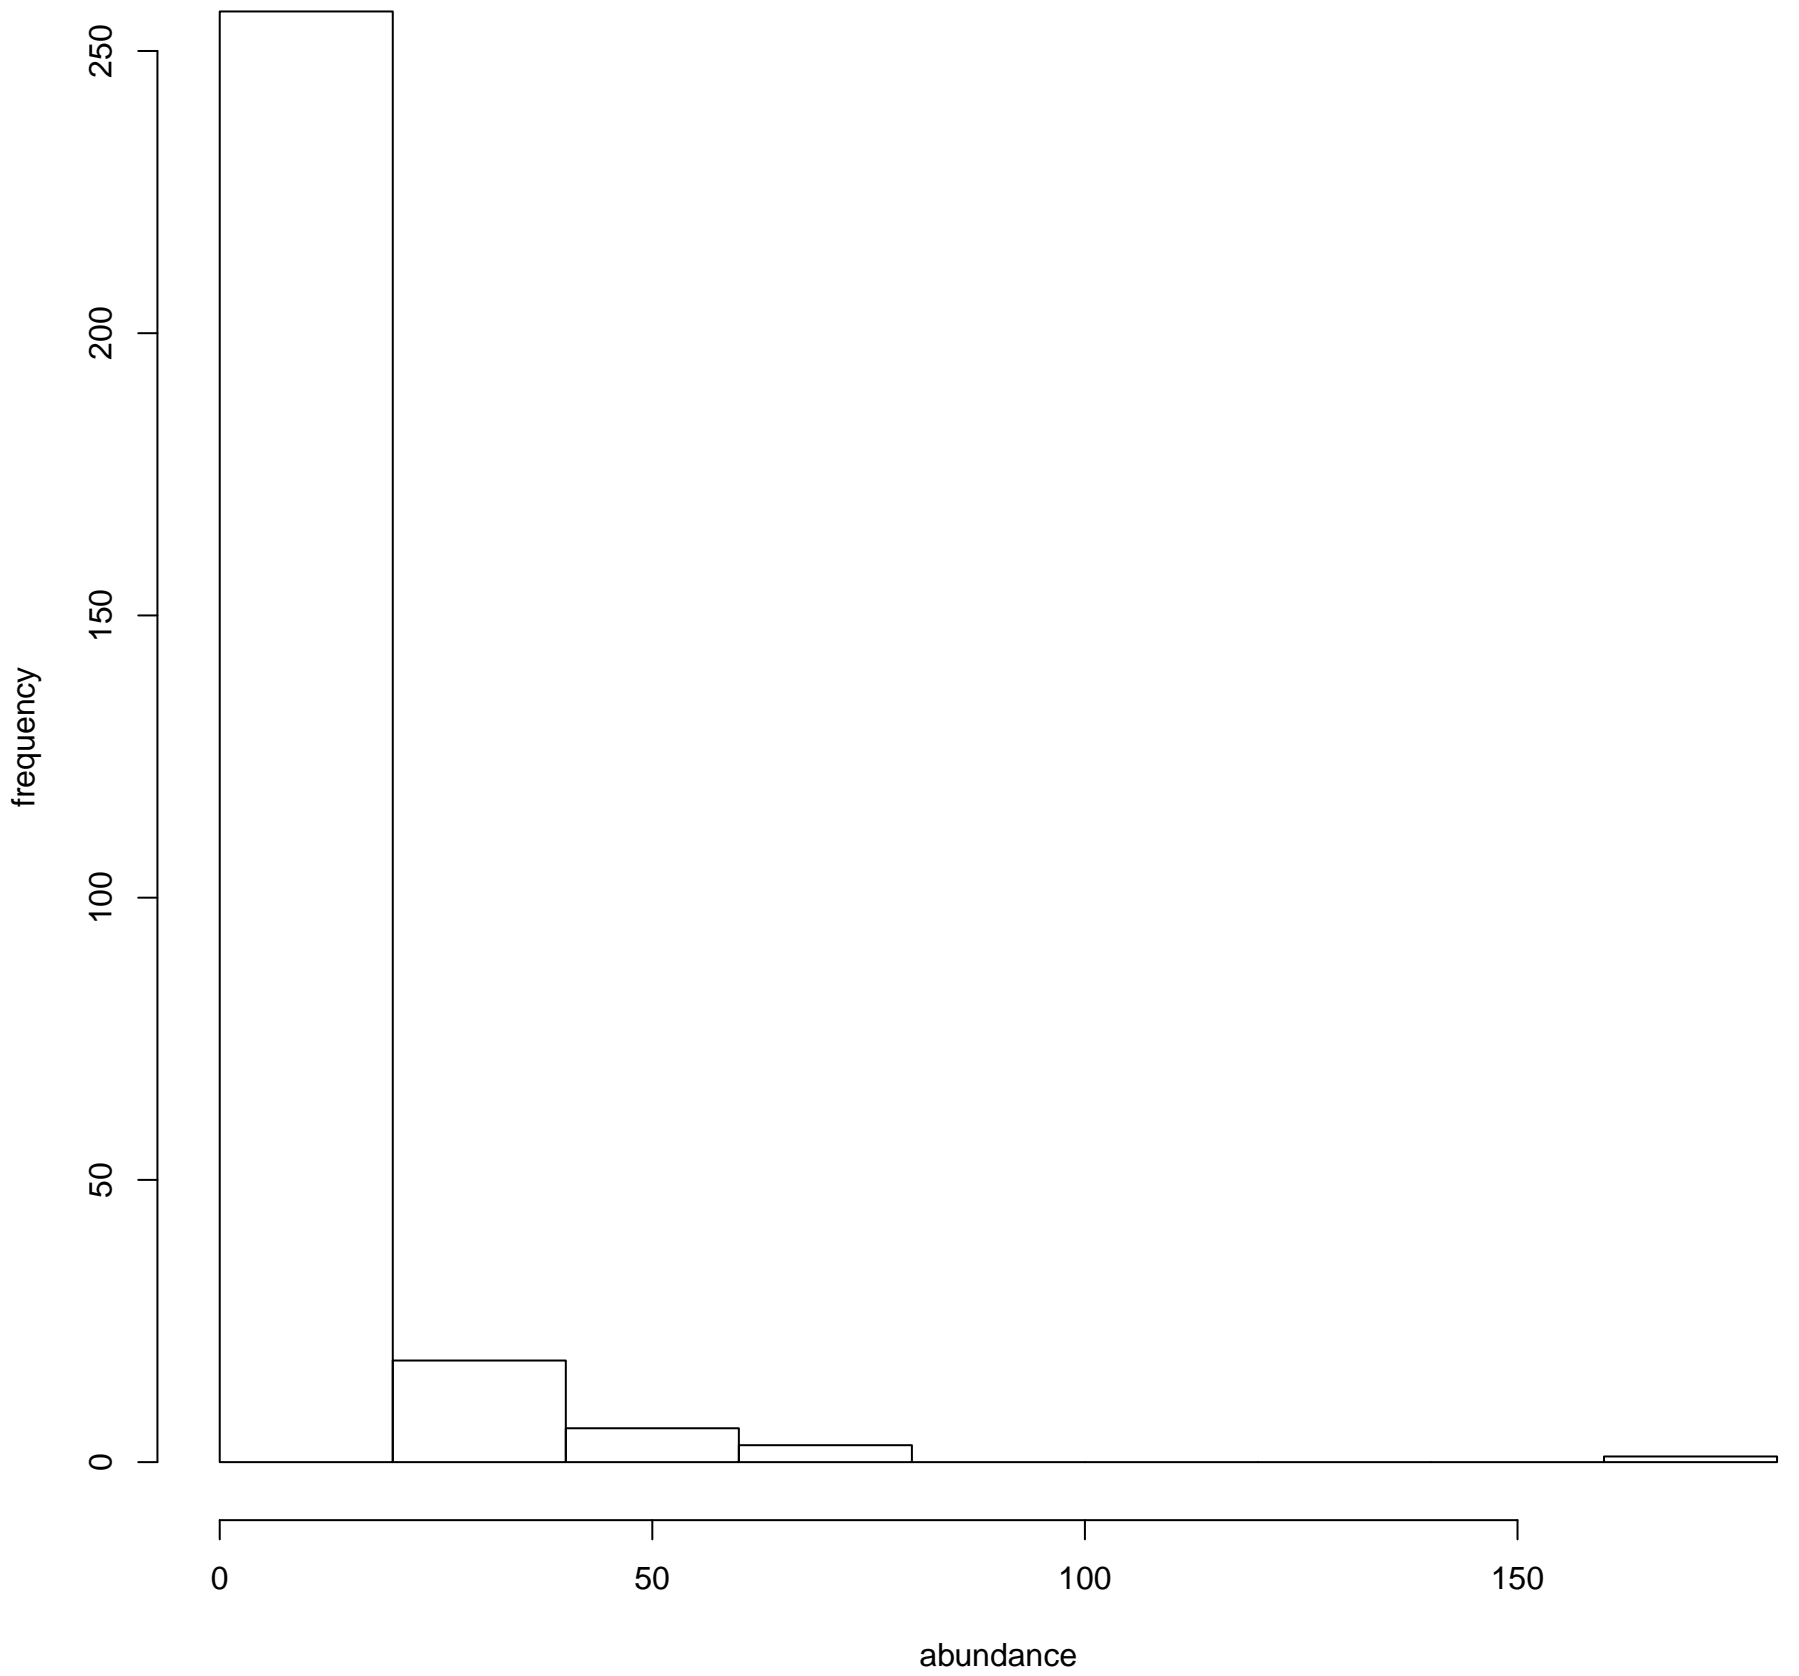

# Fine

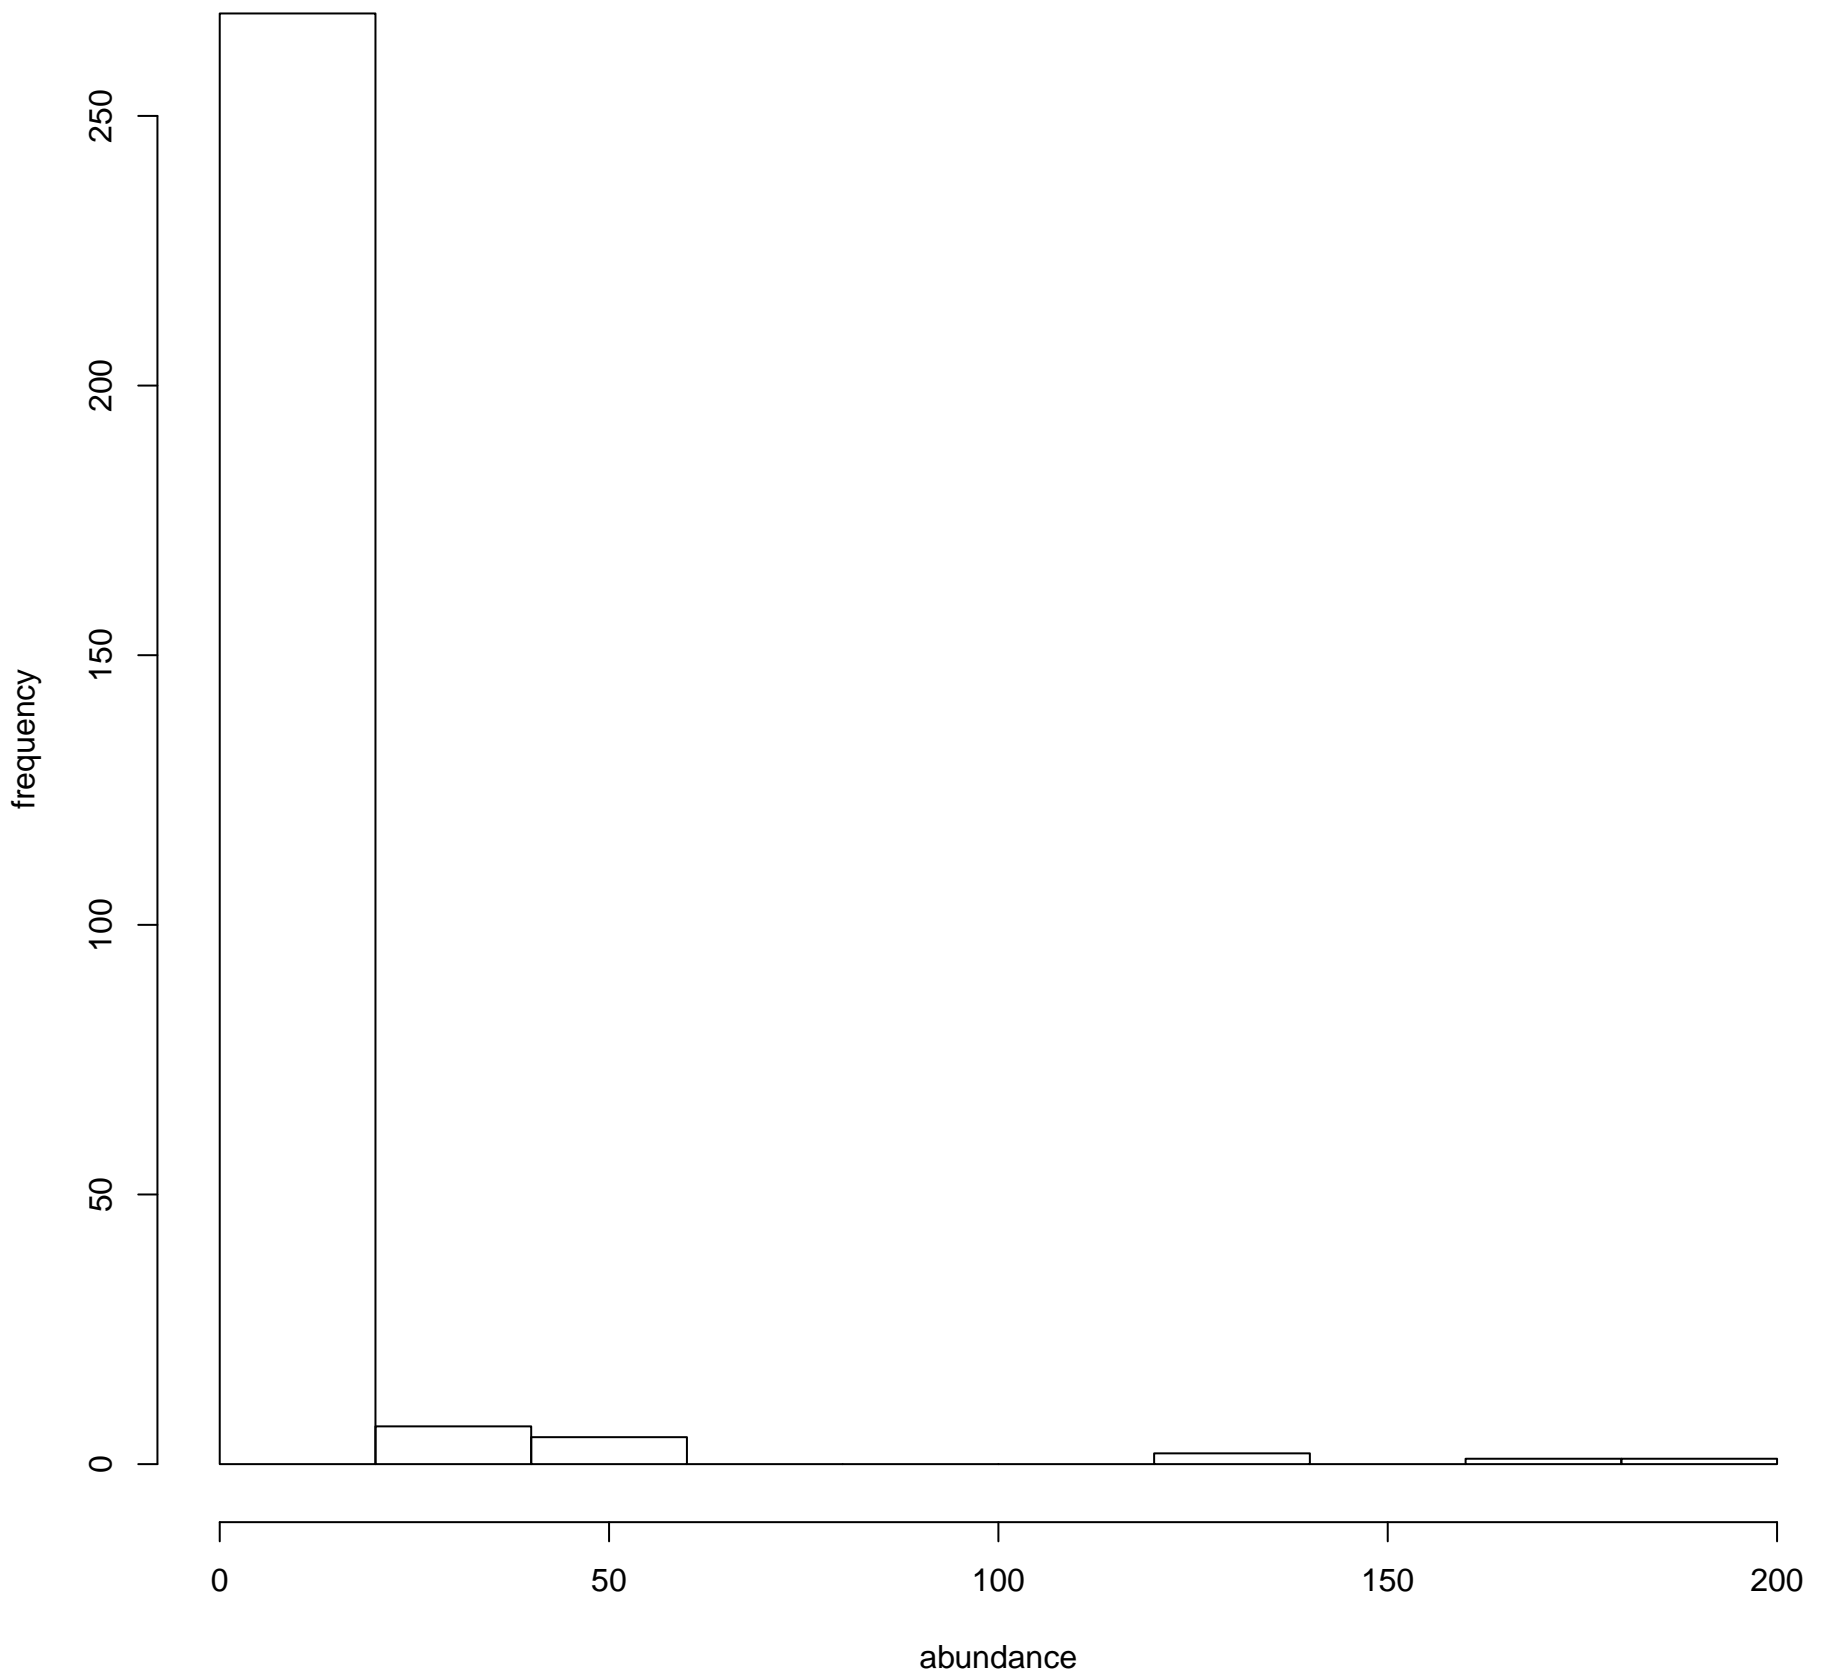

# Prot.12

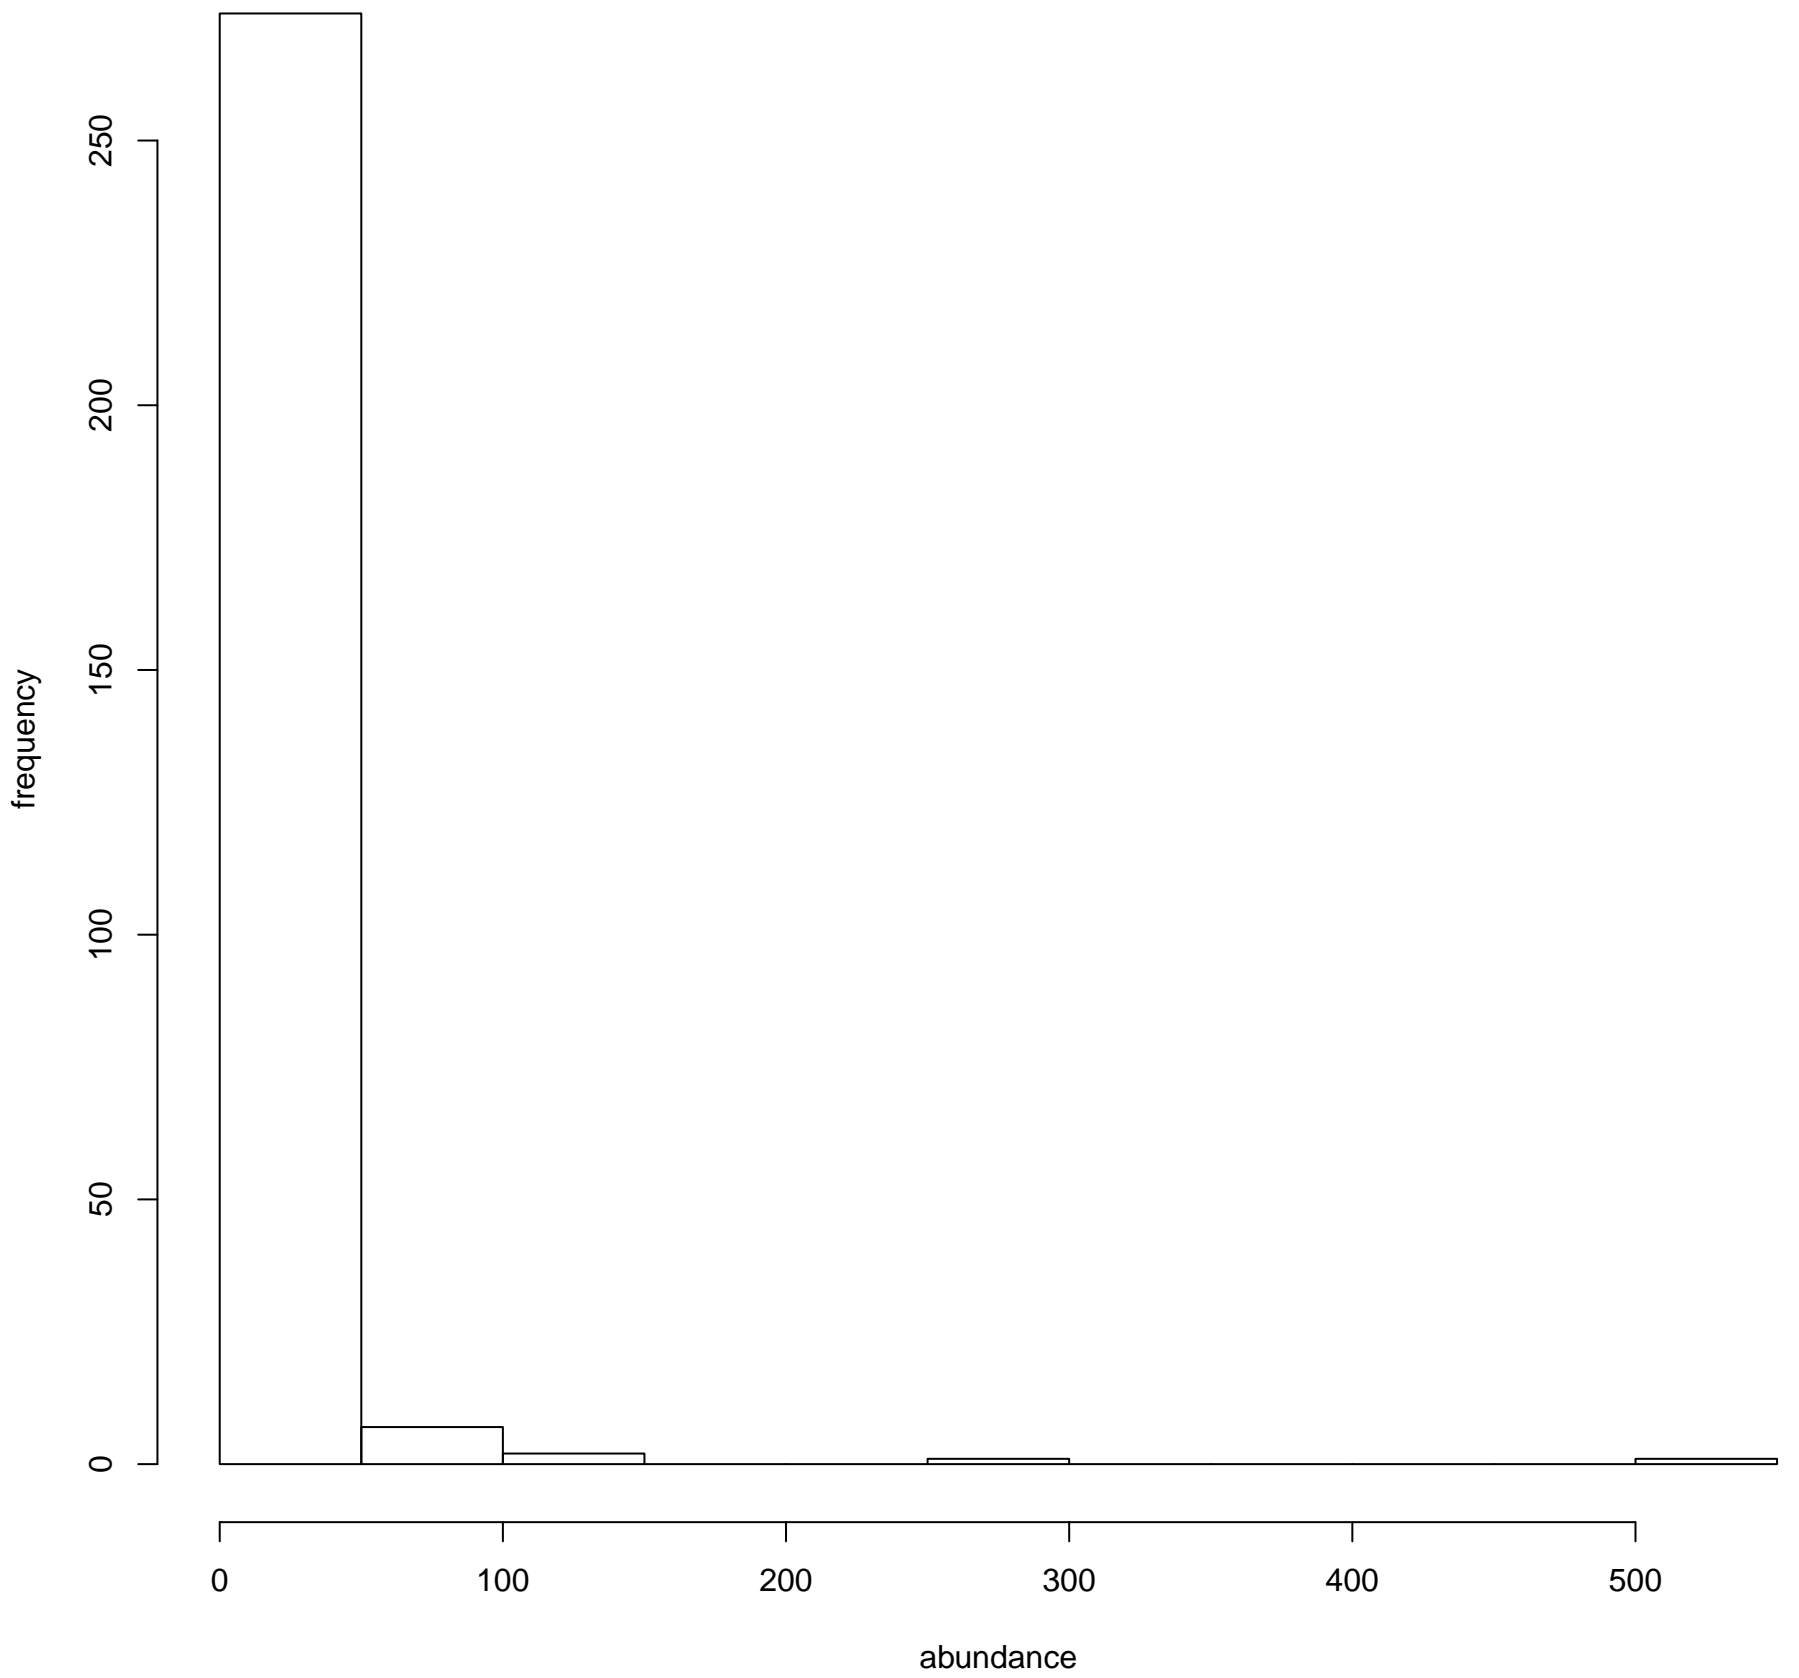



### Rum.3

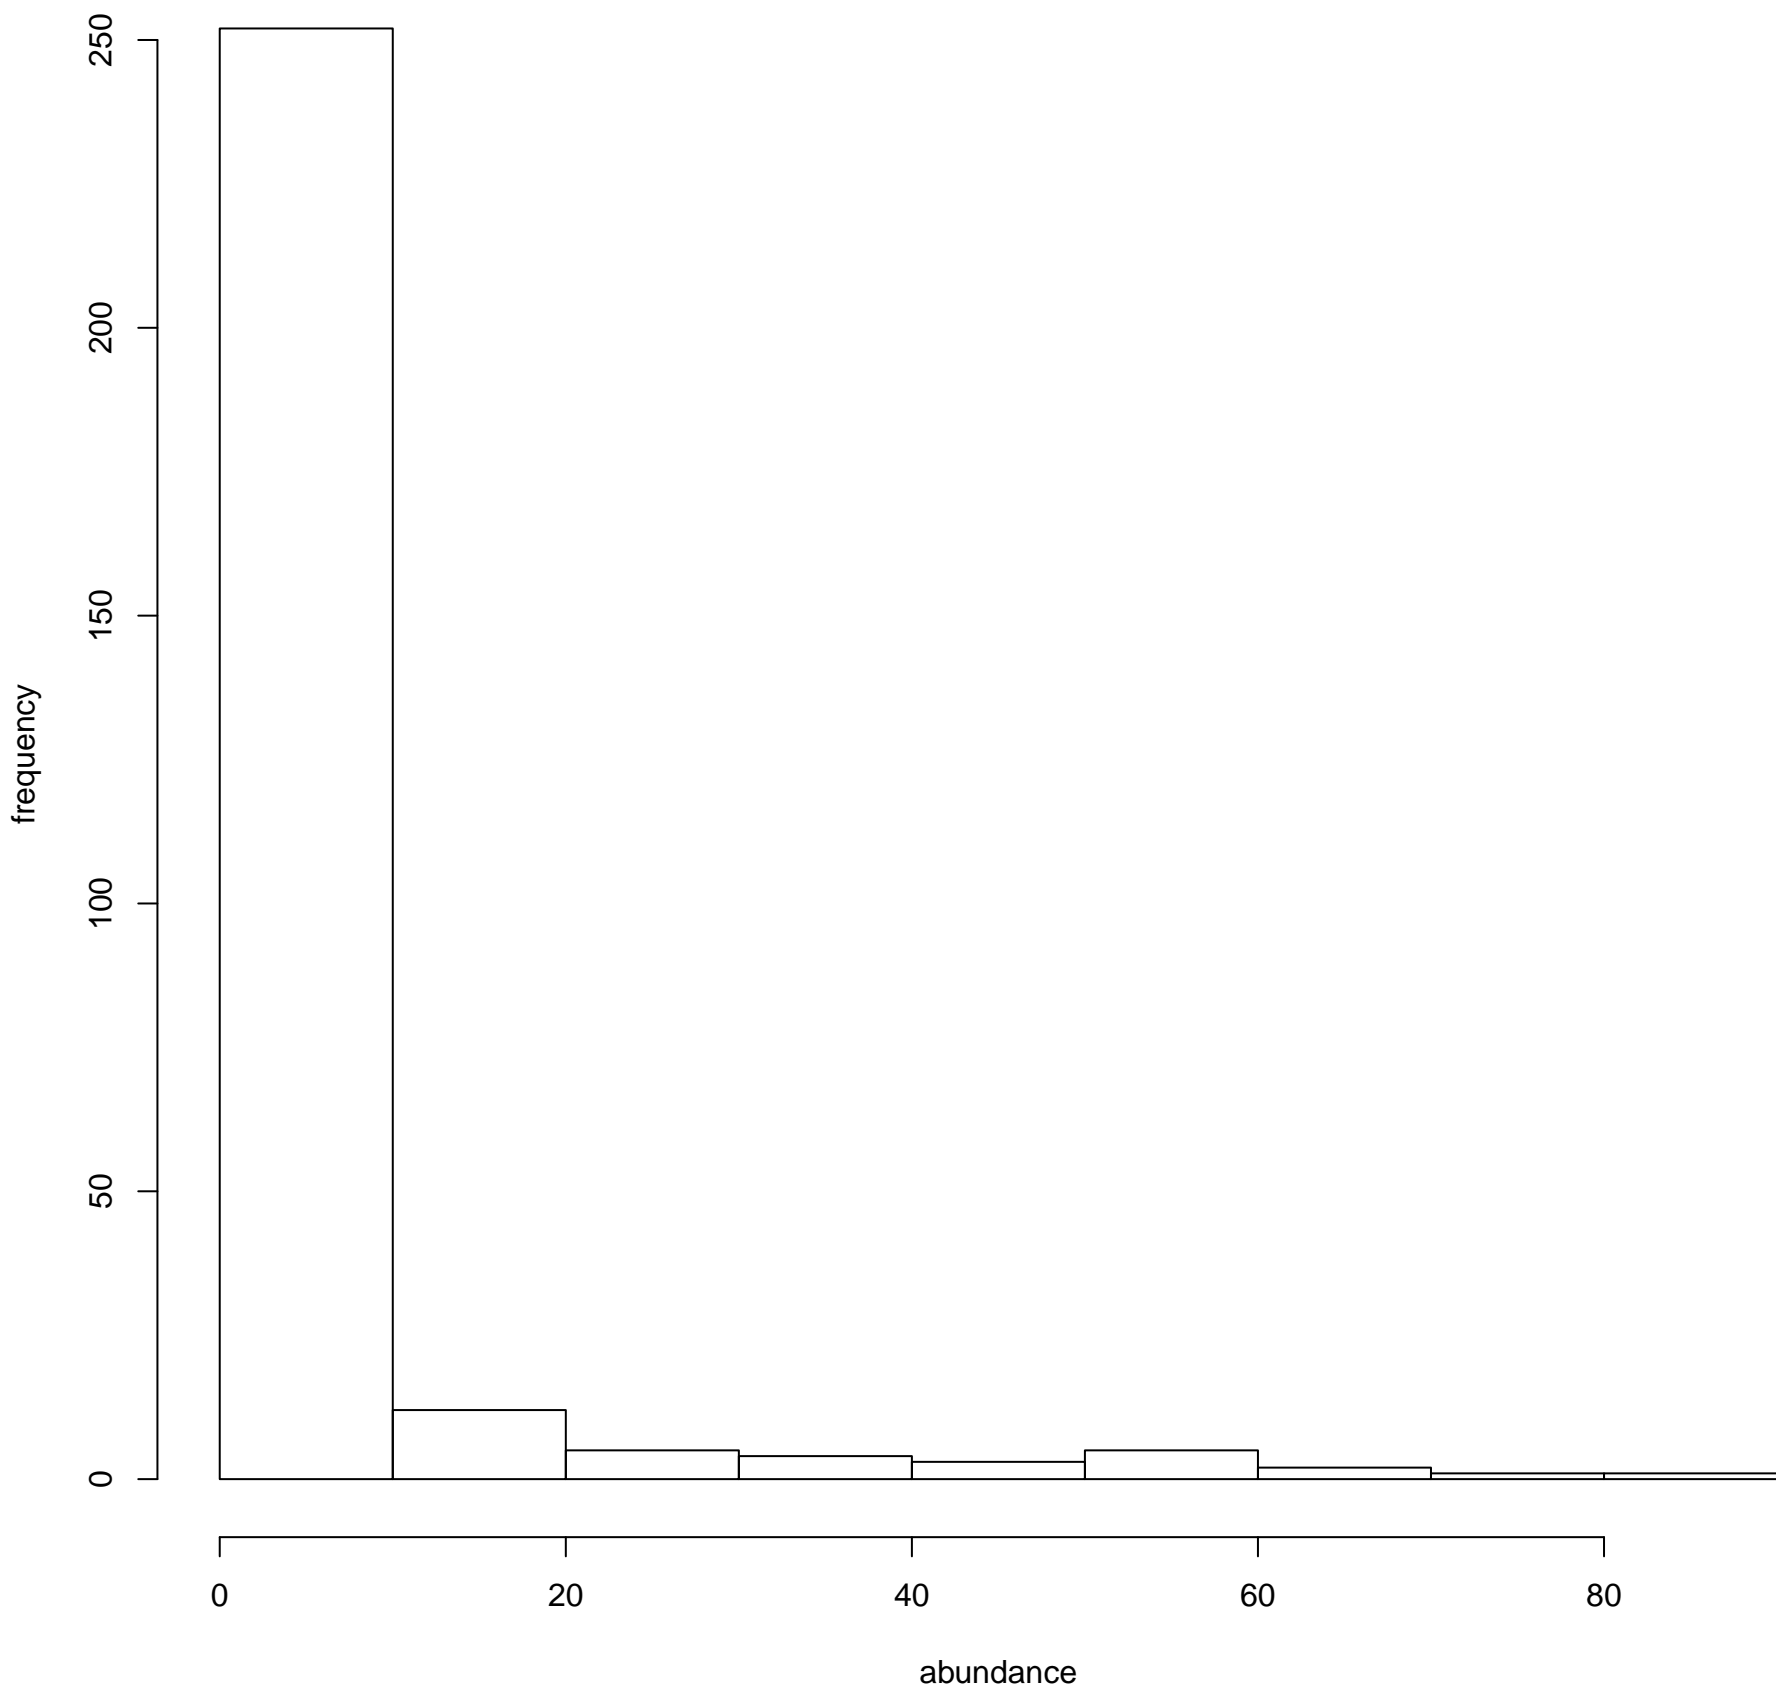

# Urea

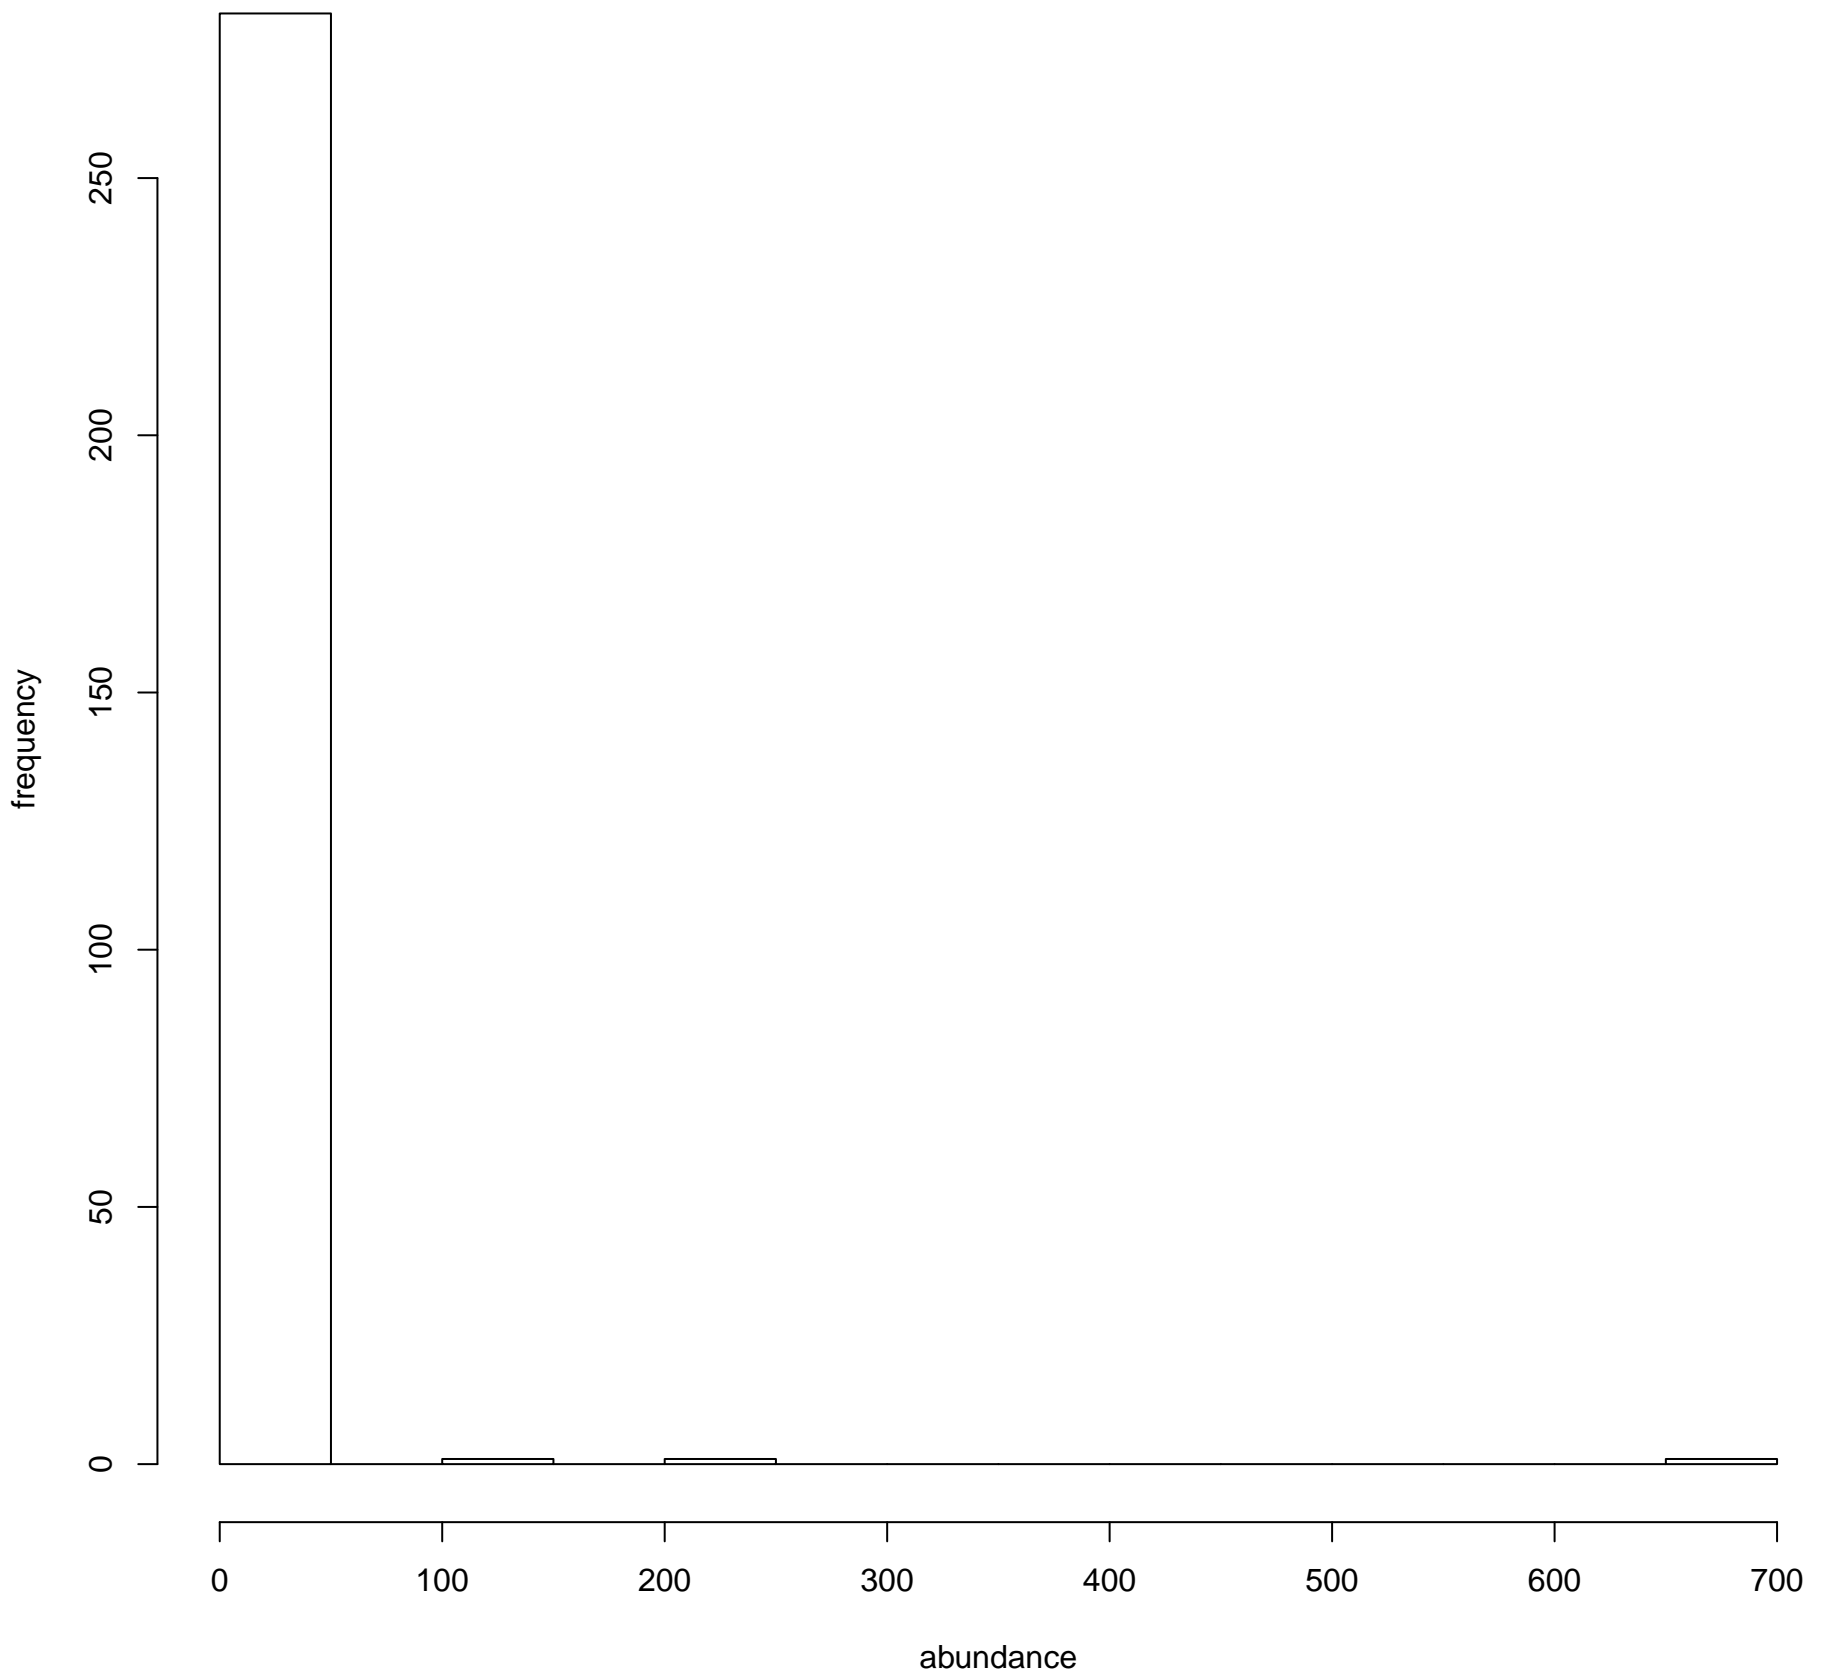

# Myco

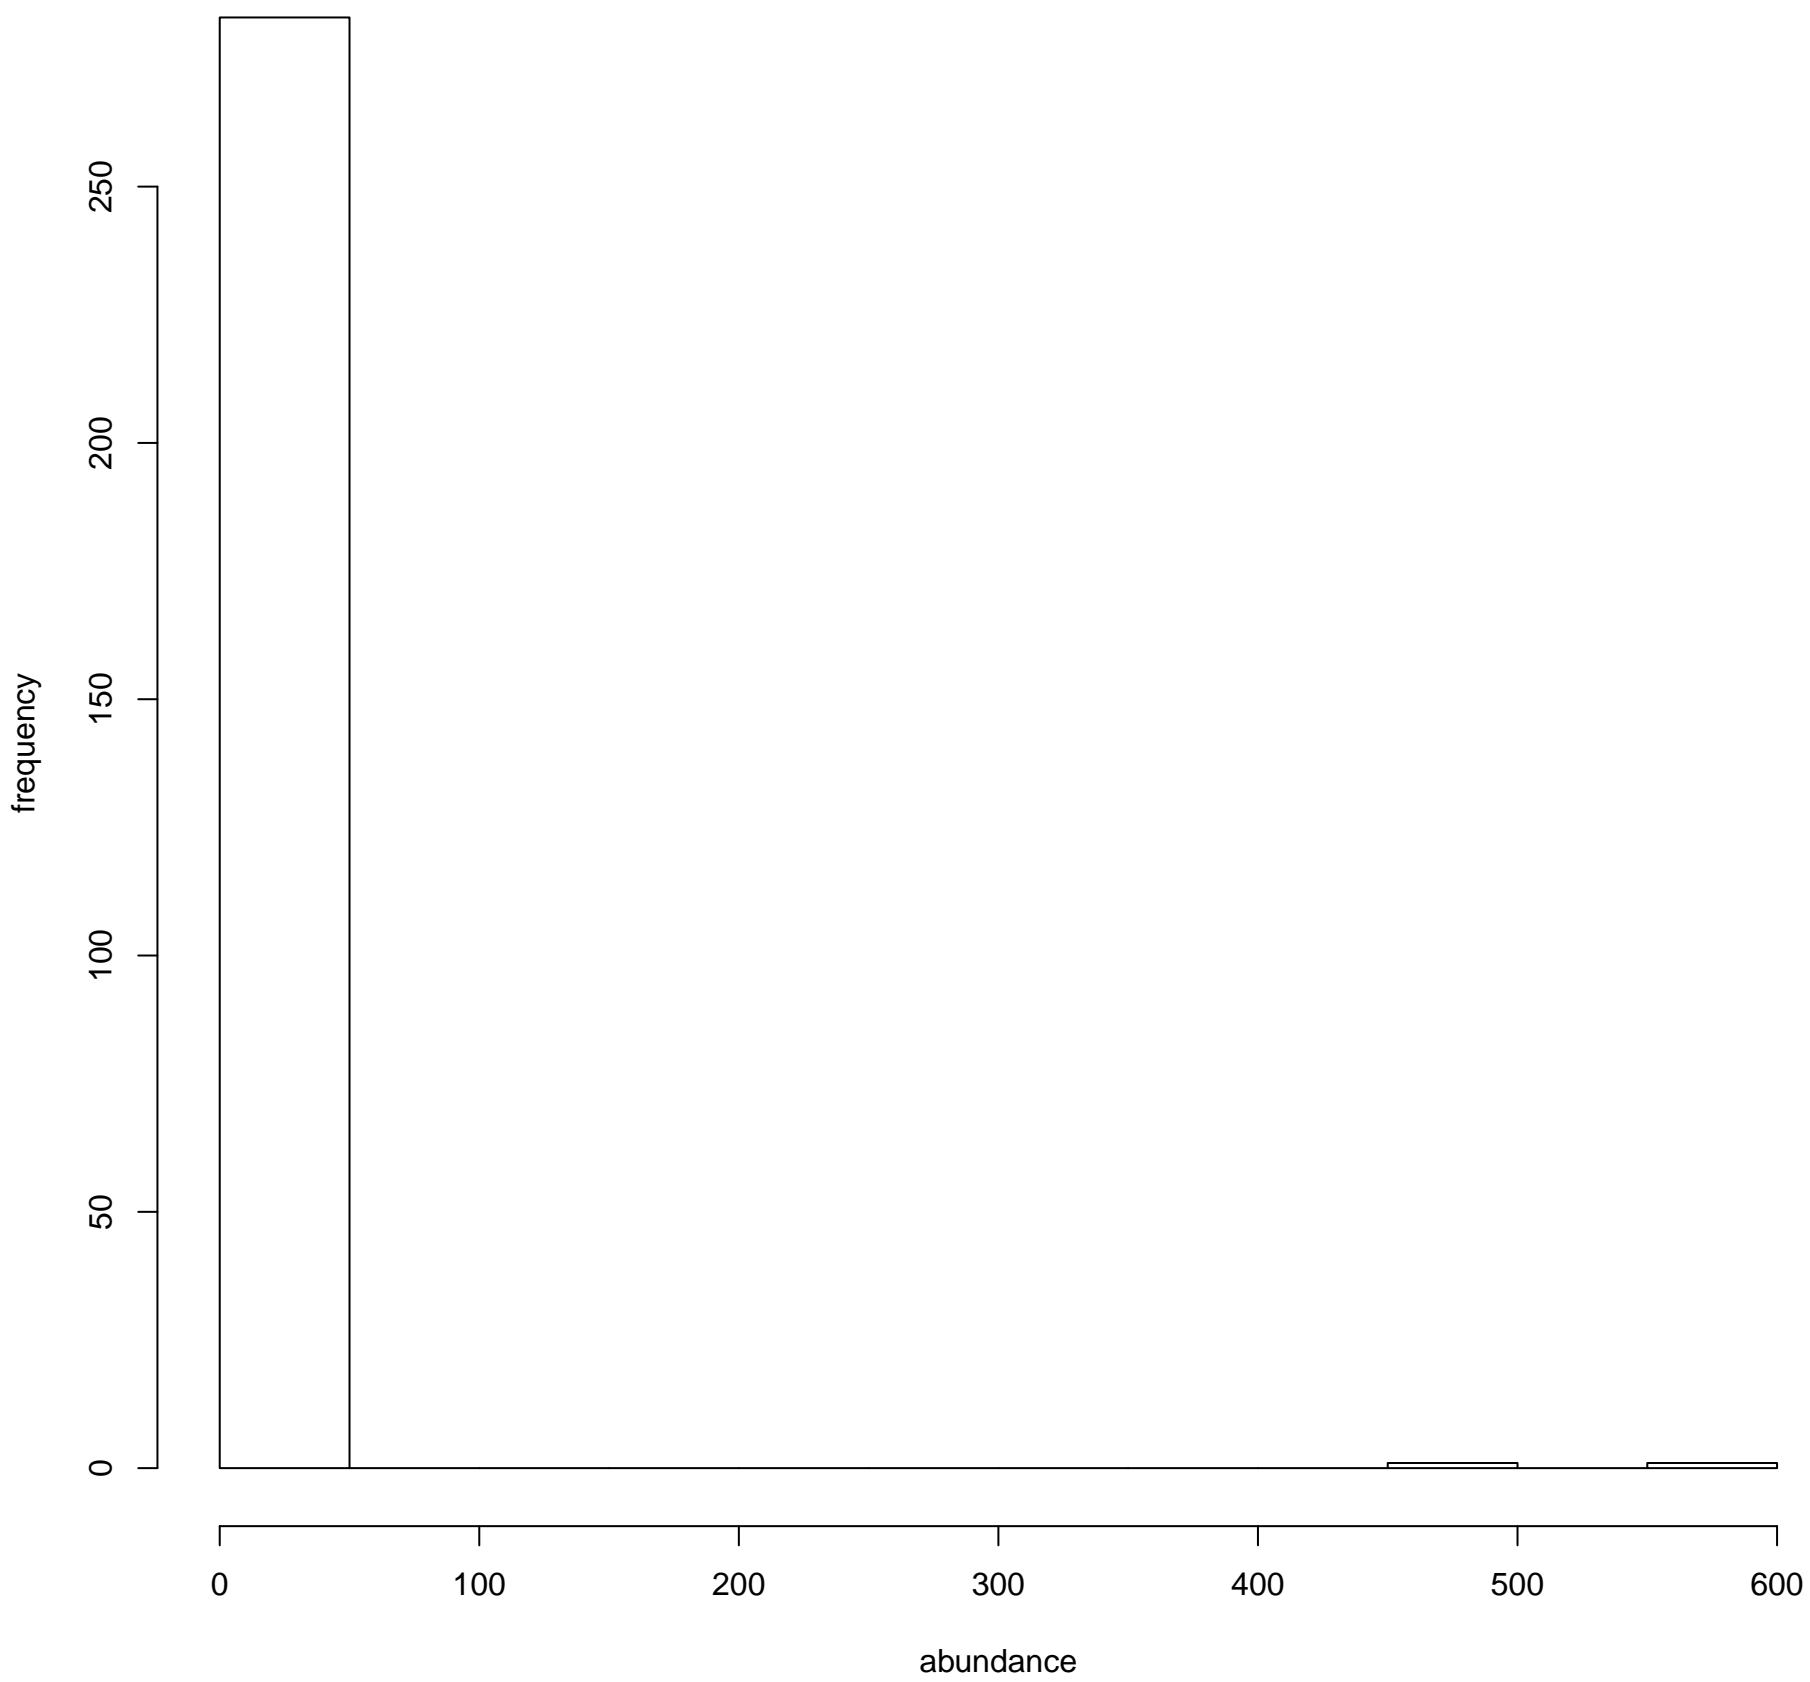

# Aero

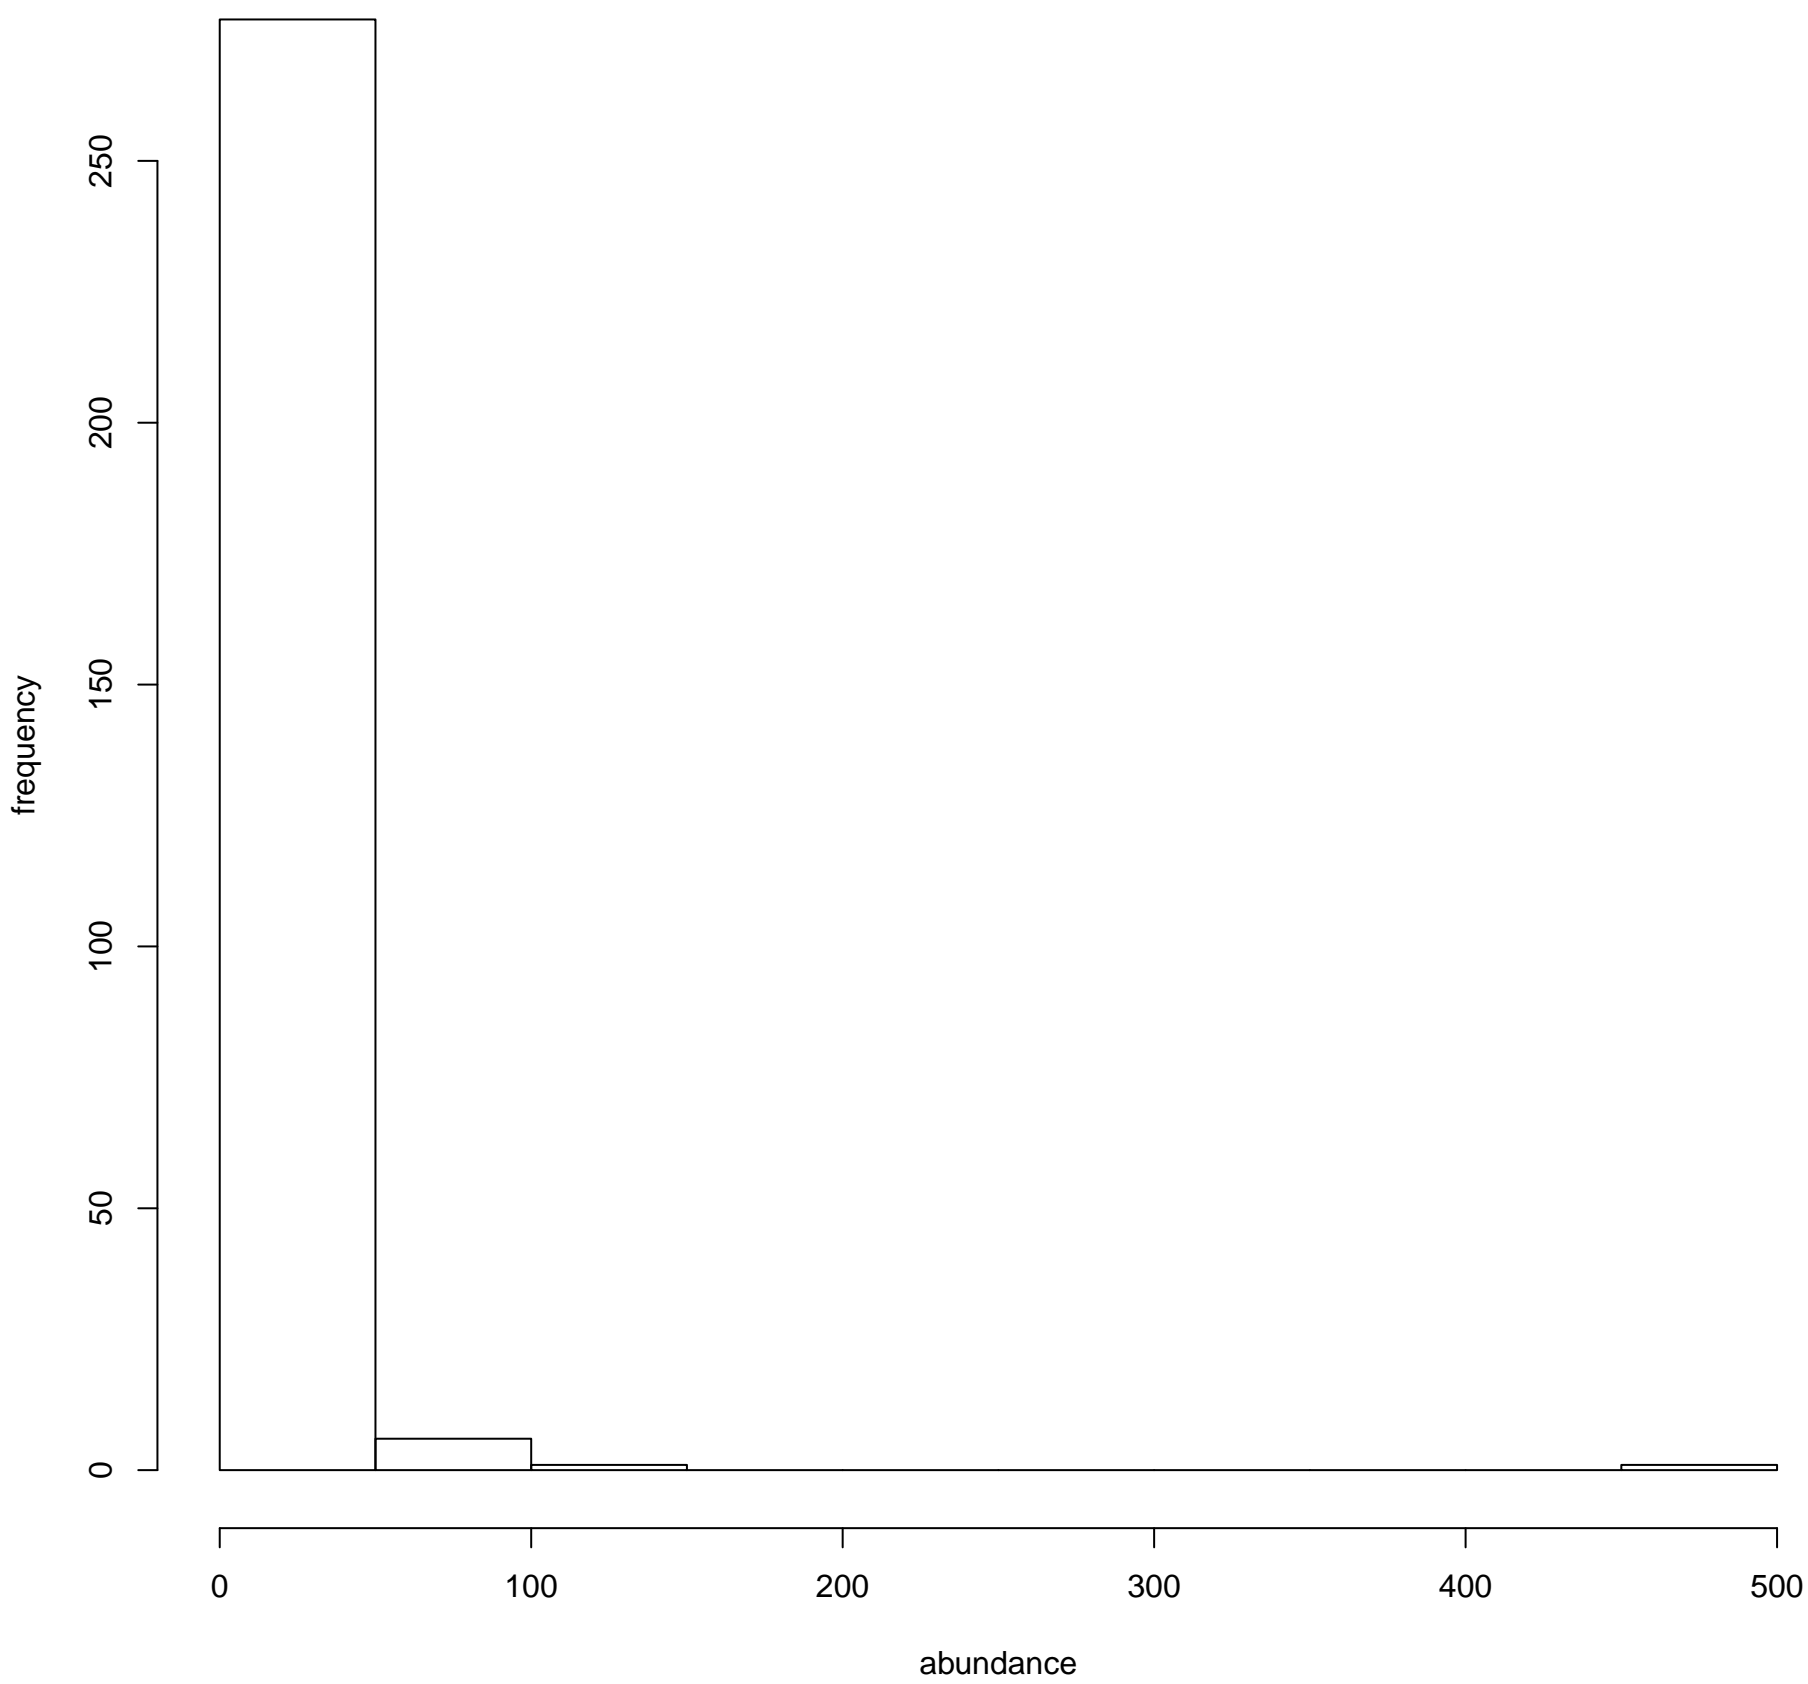

# Parv

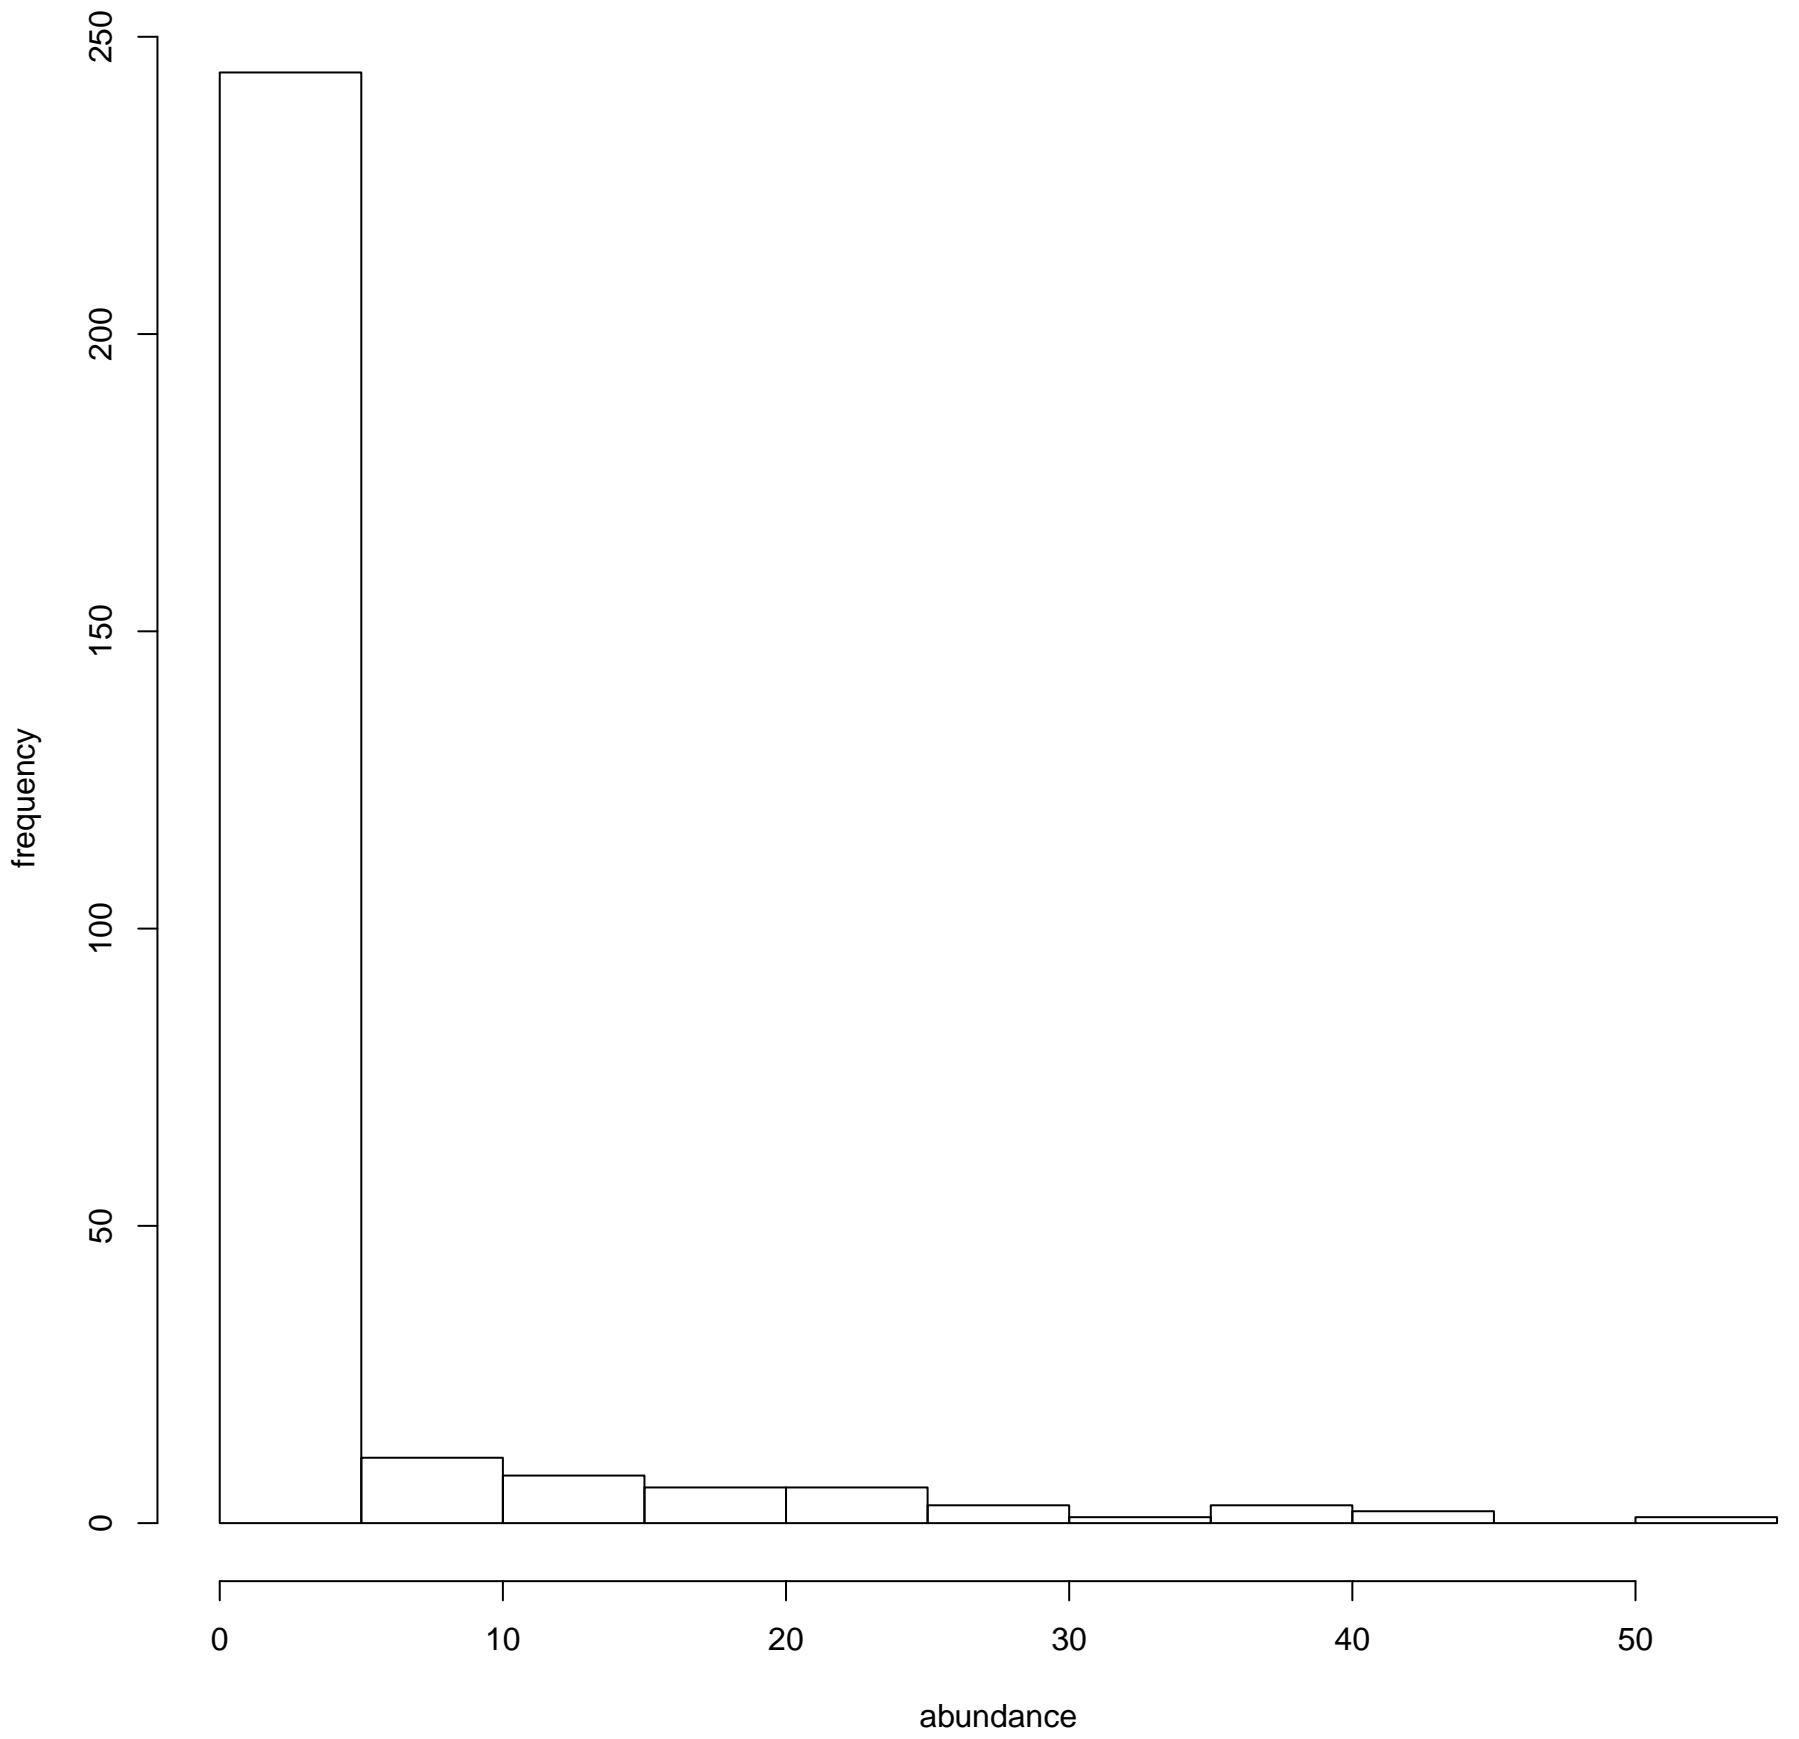

# Stap

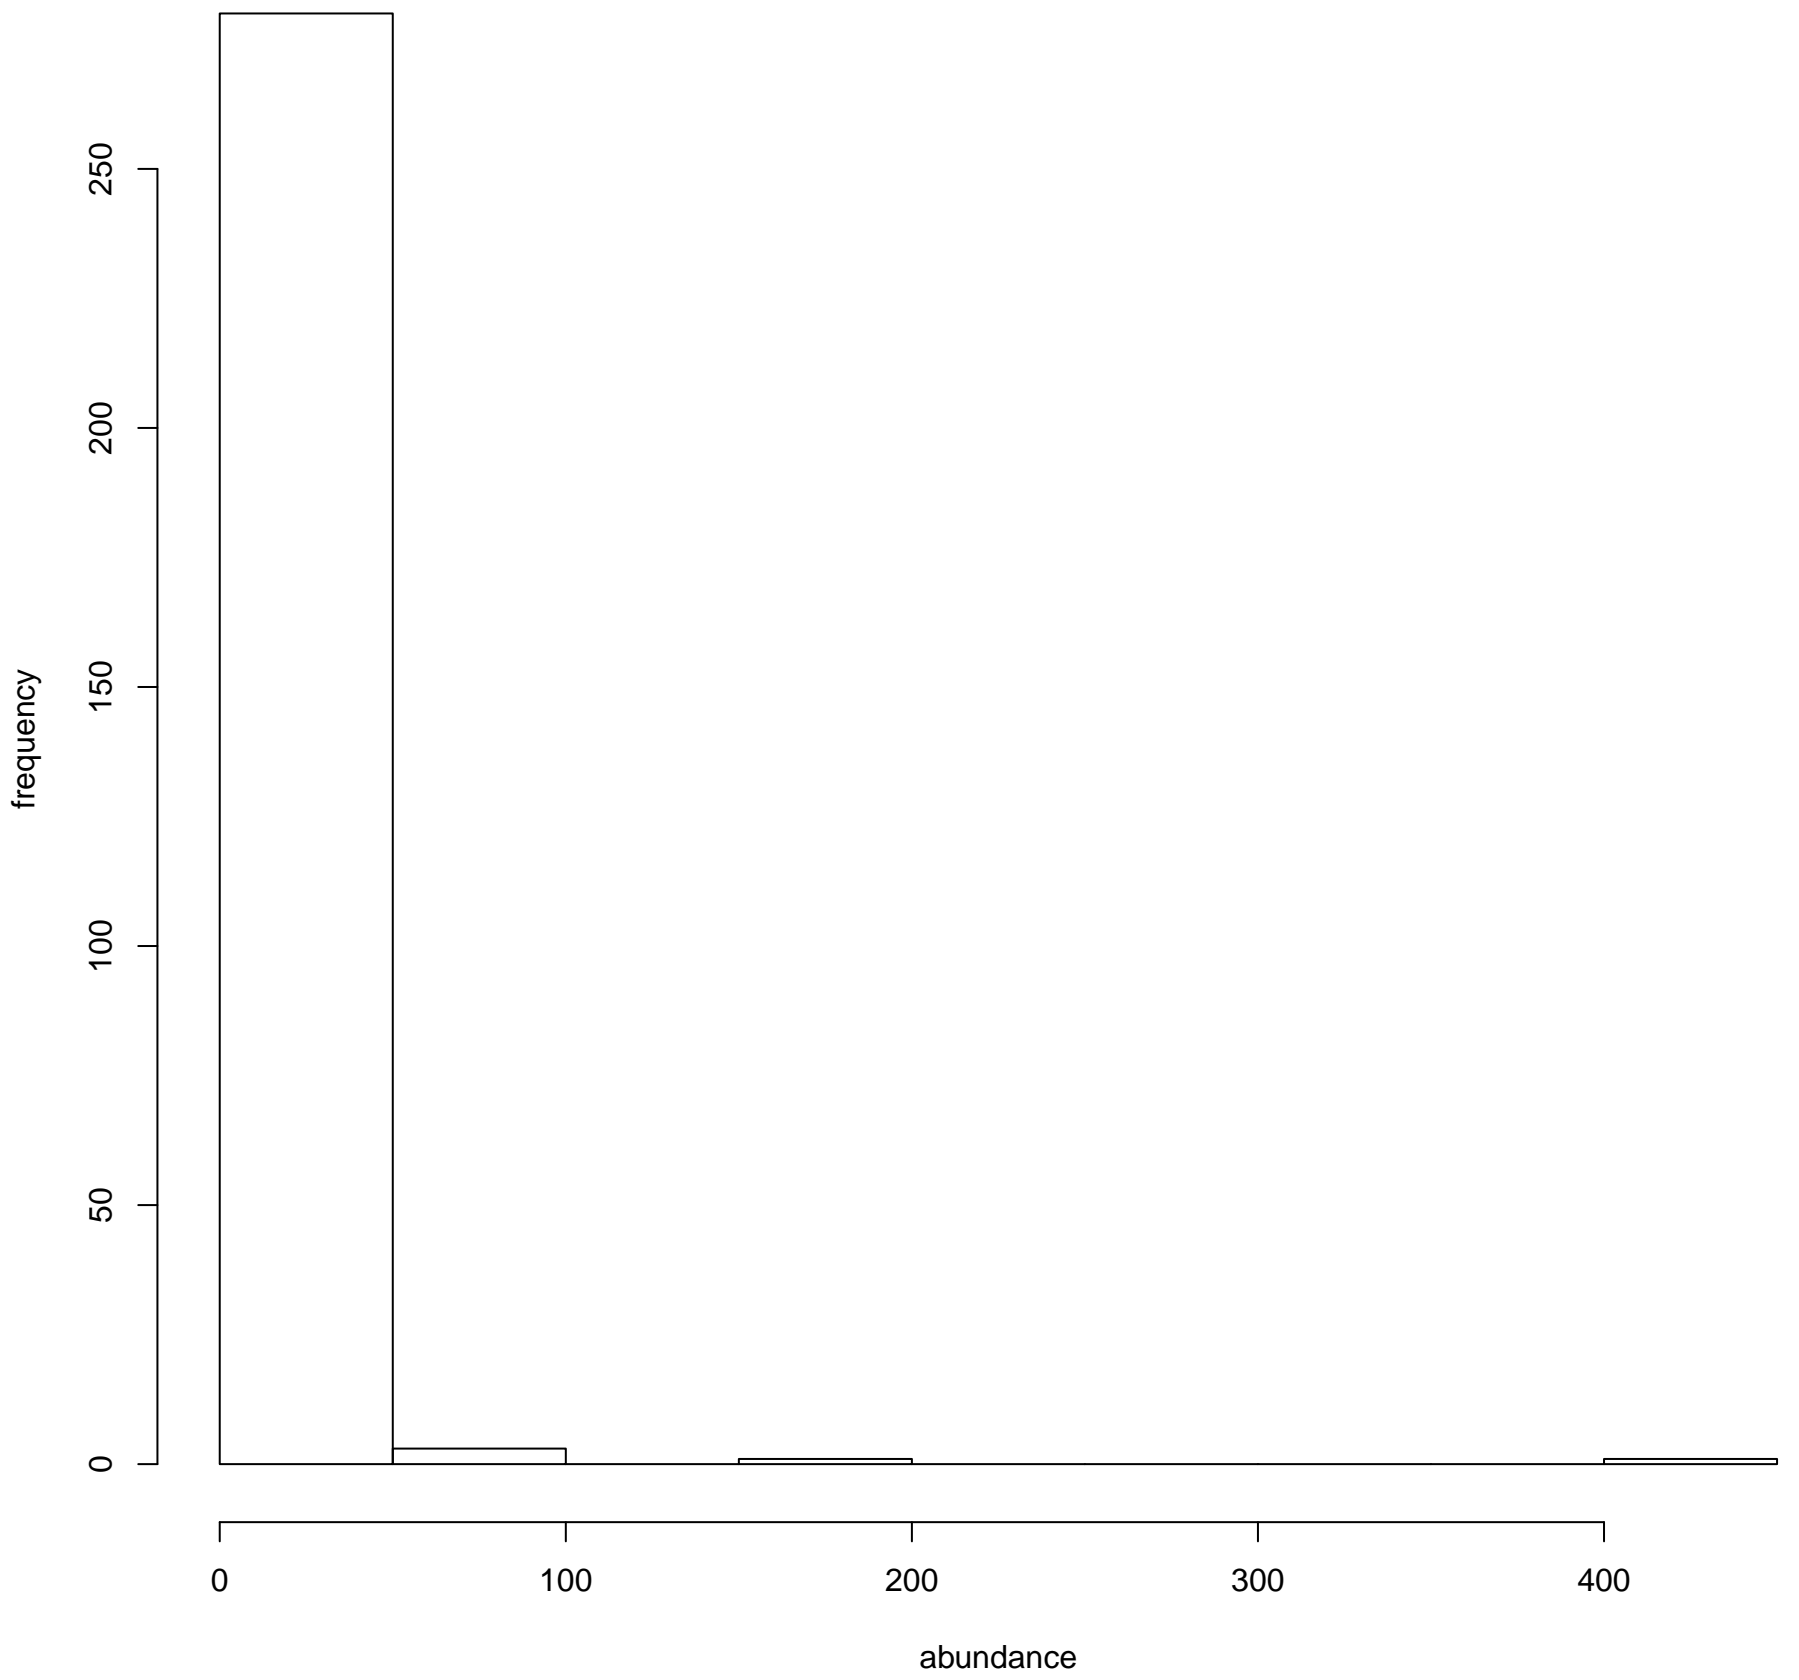

# Coryn.ium

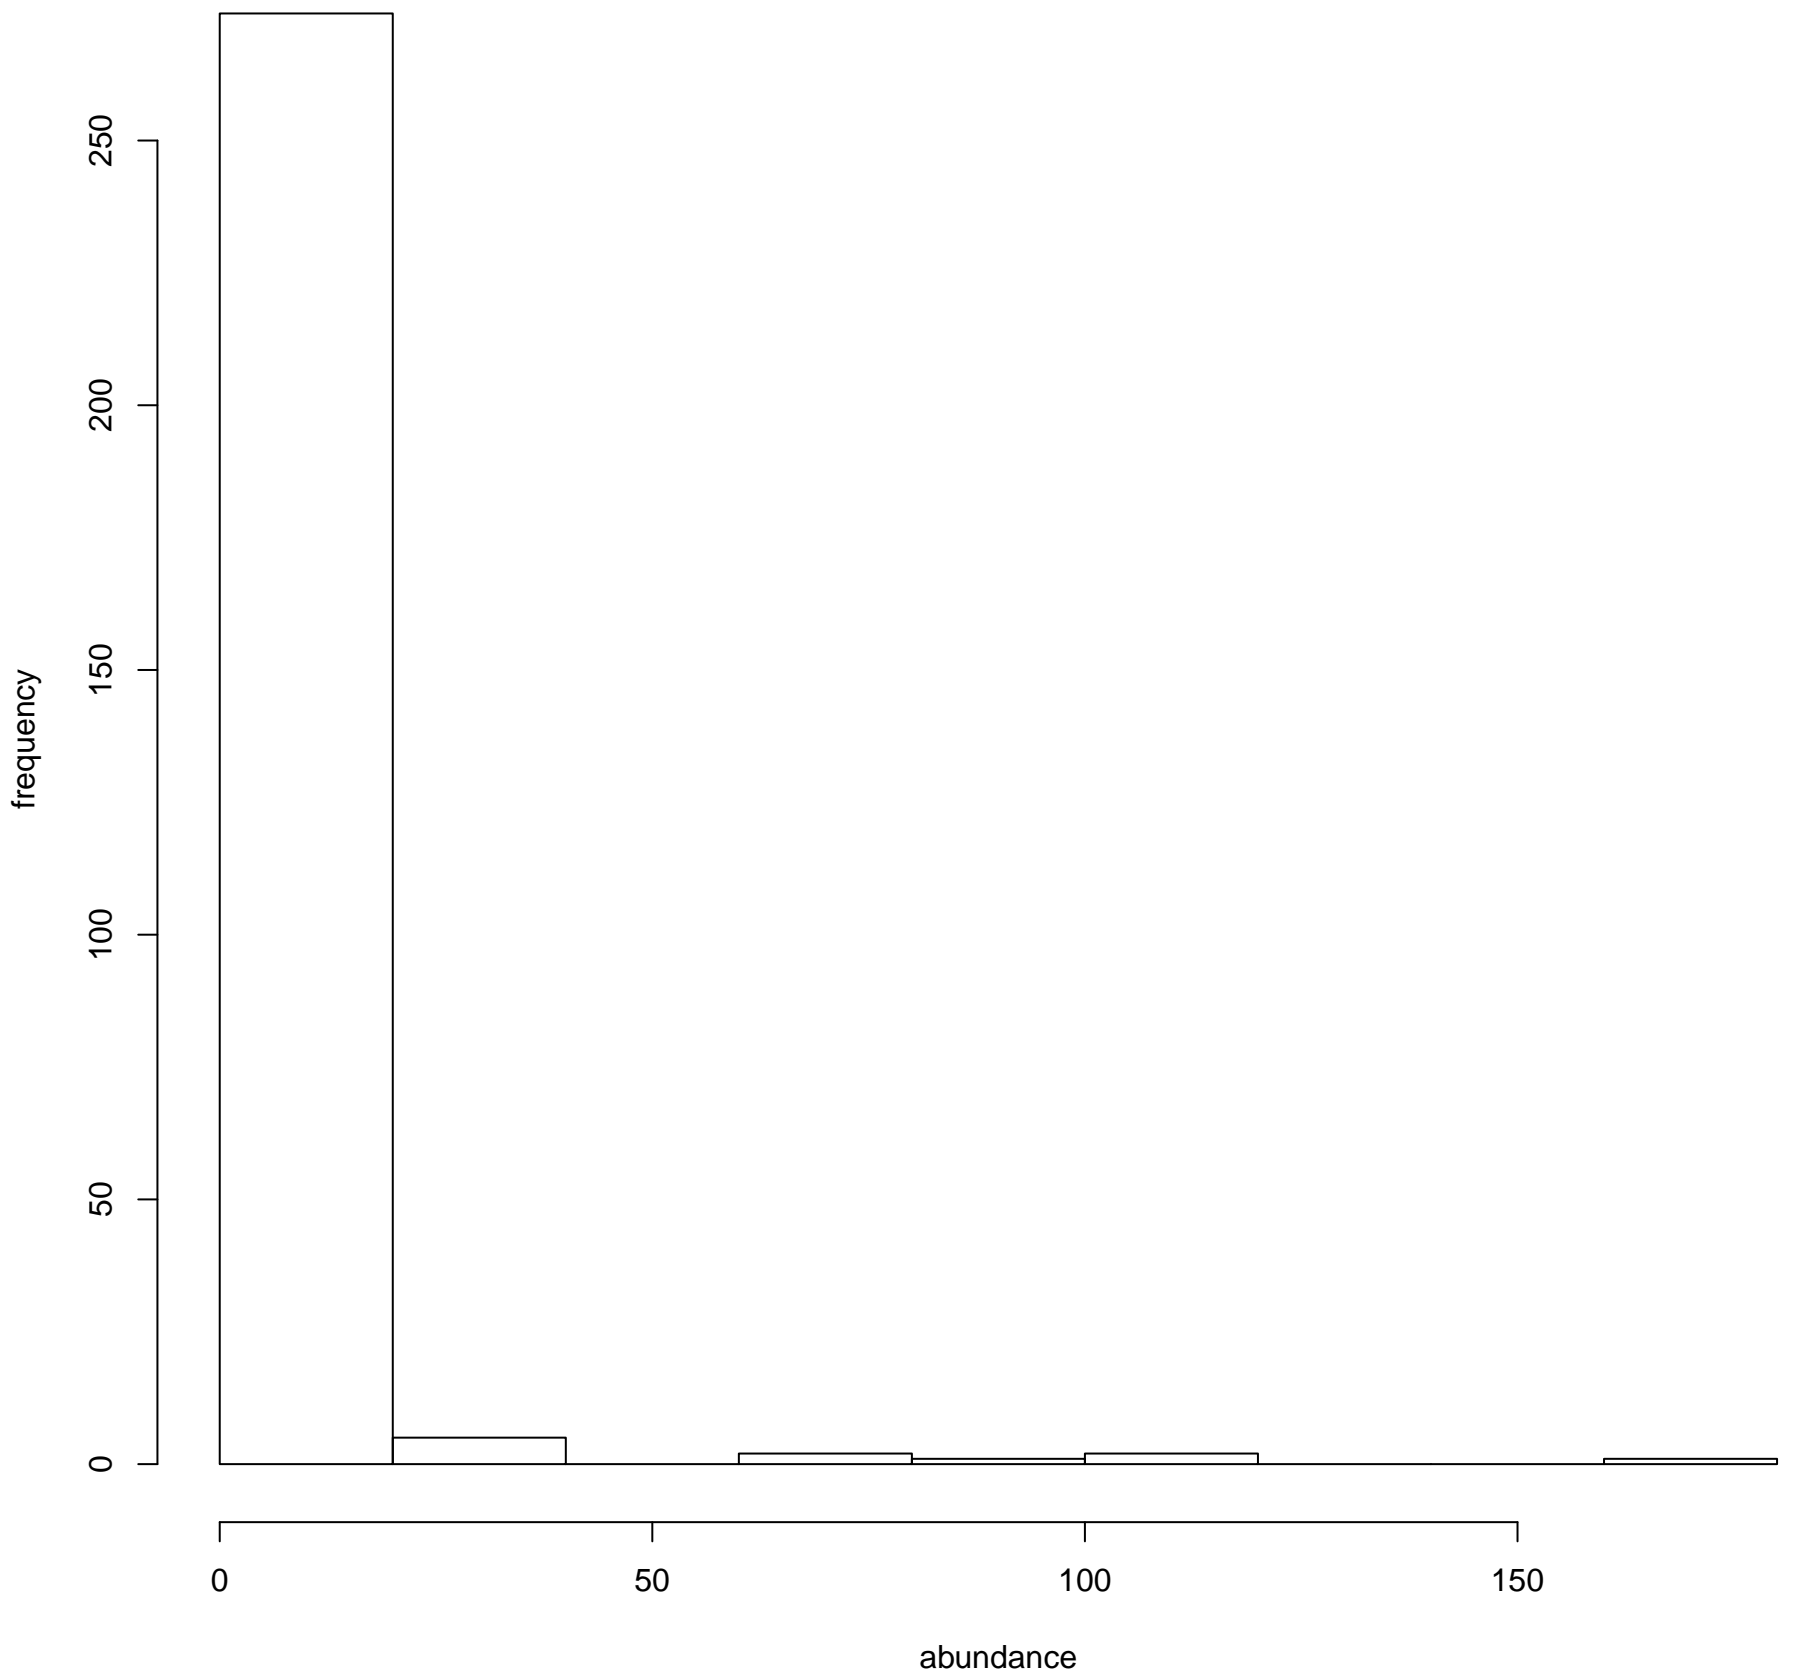

# Veil

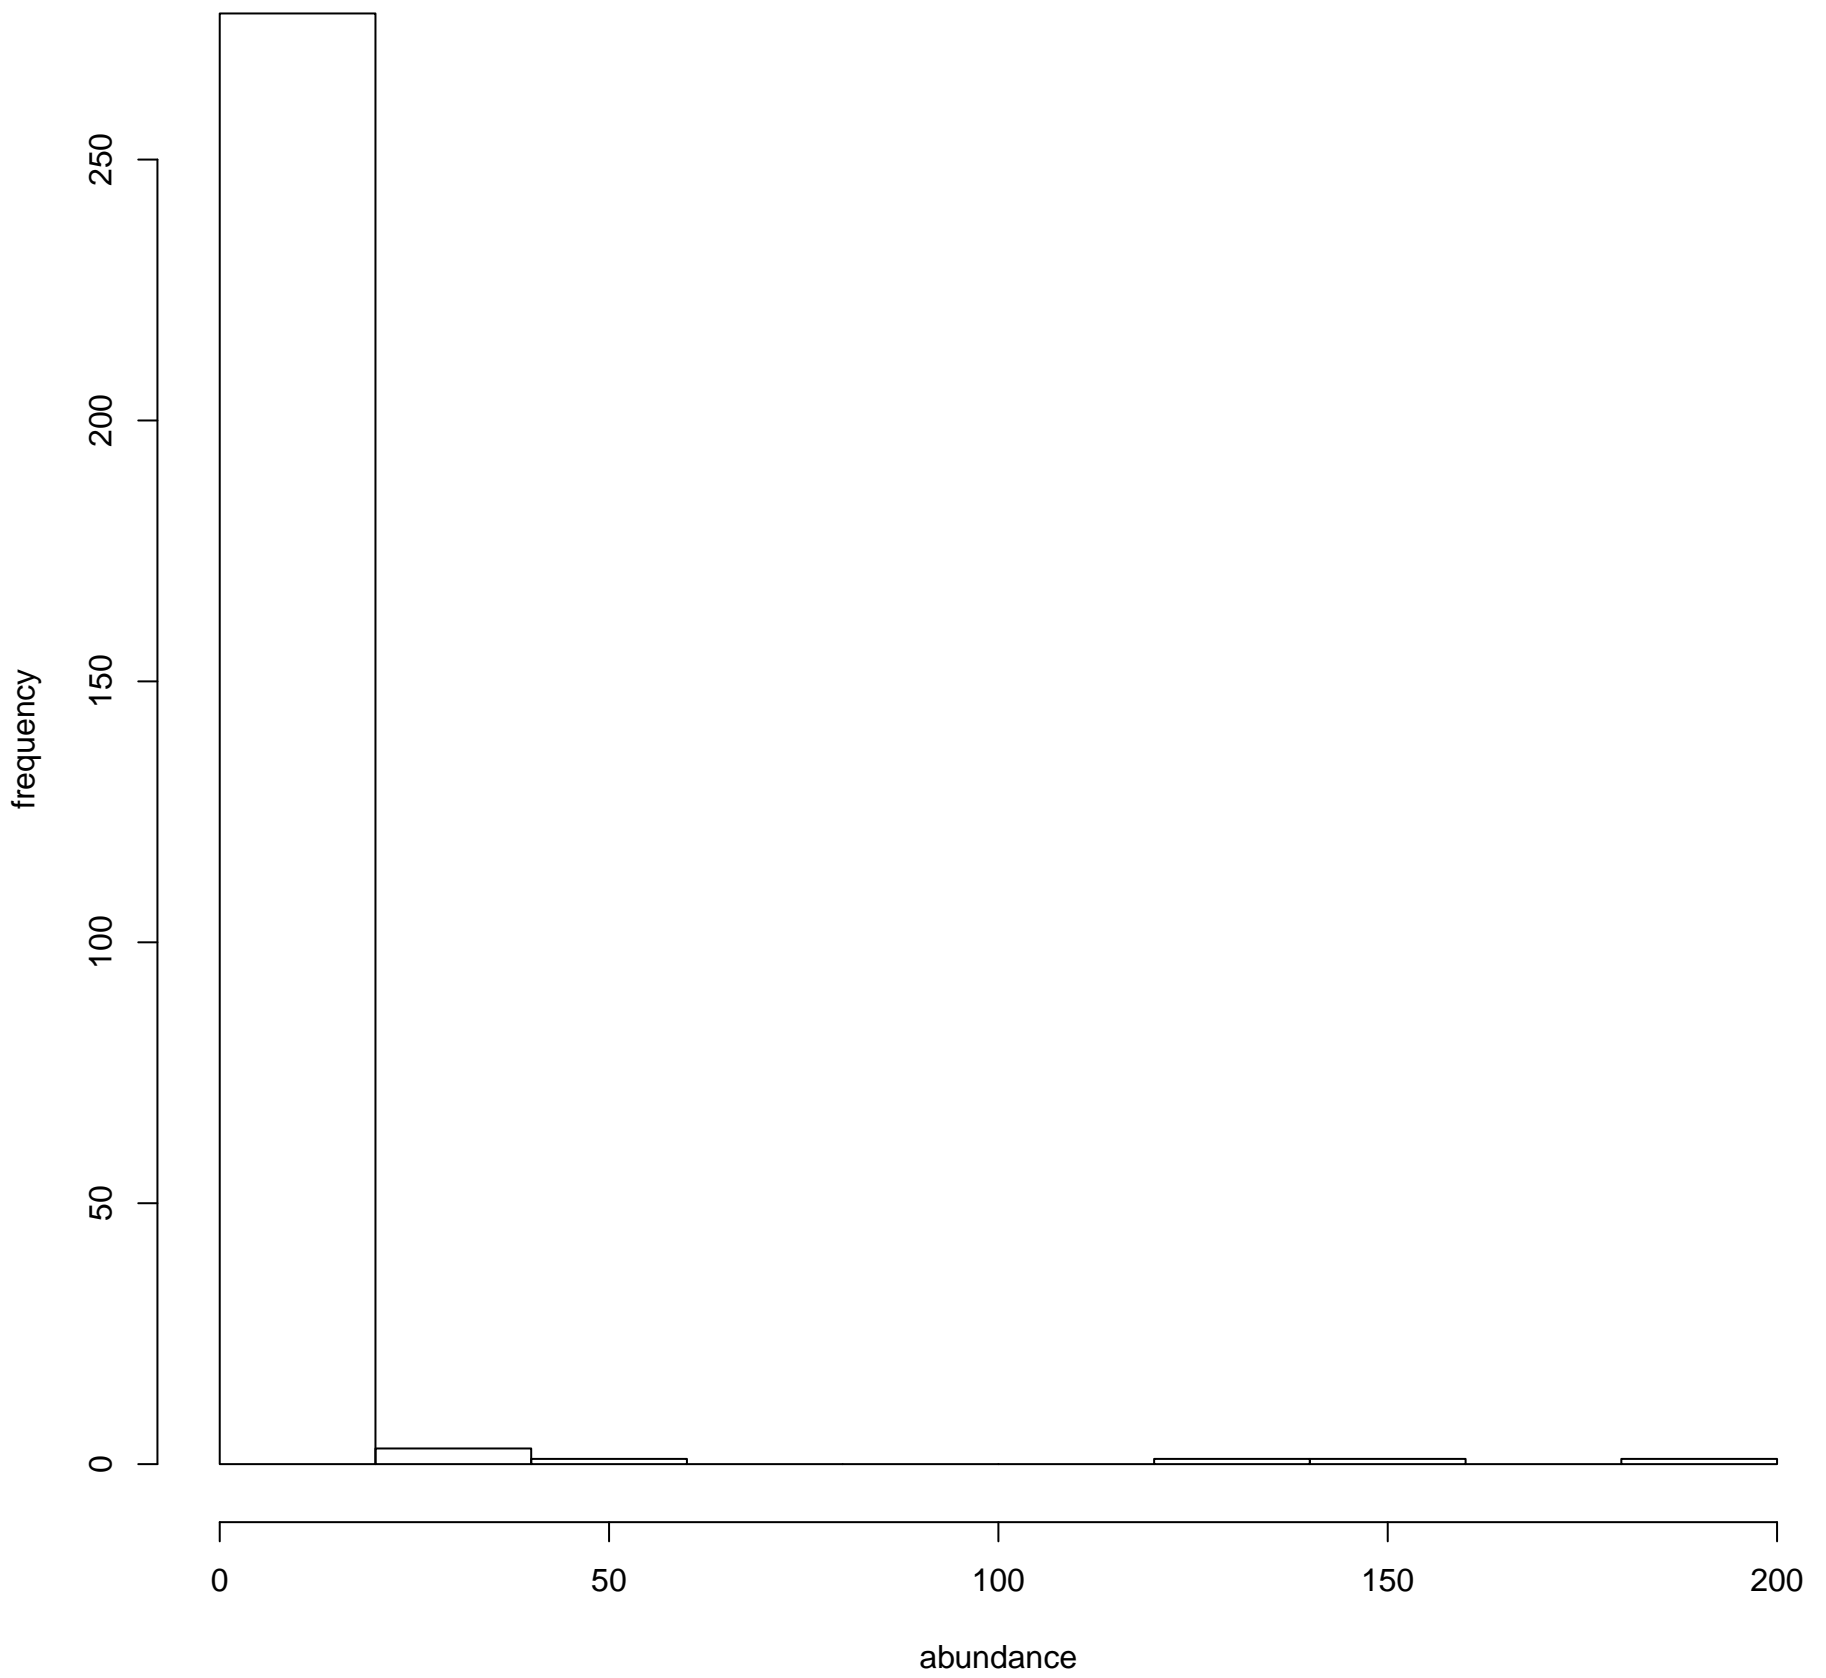



L.va

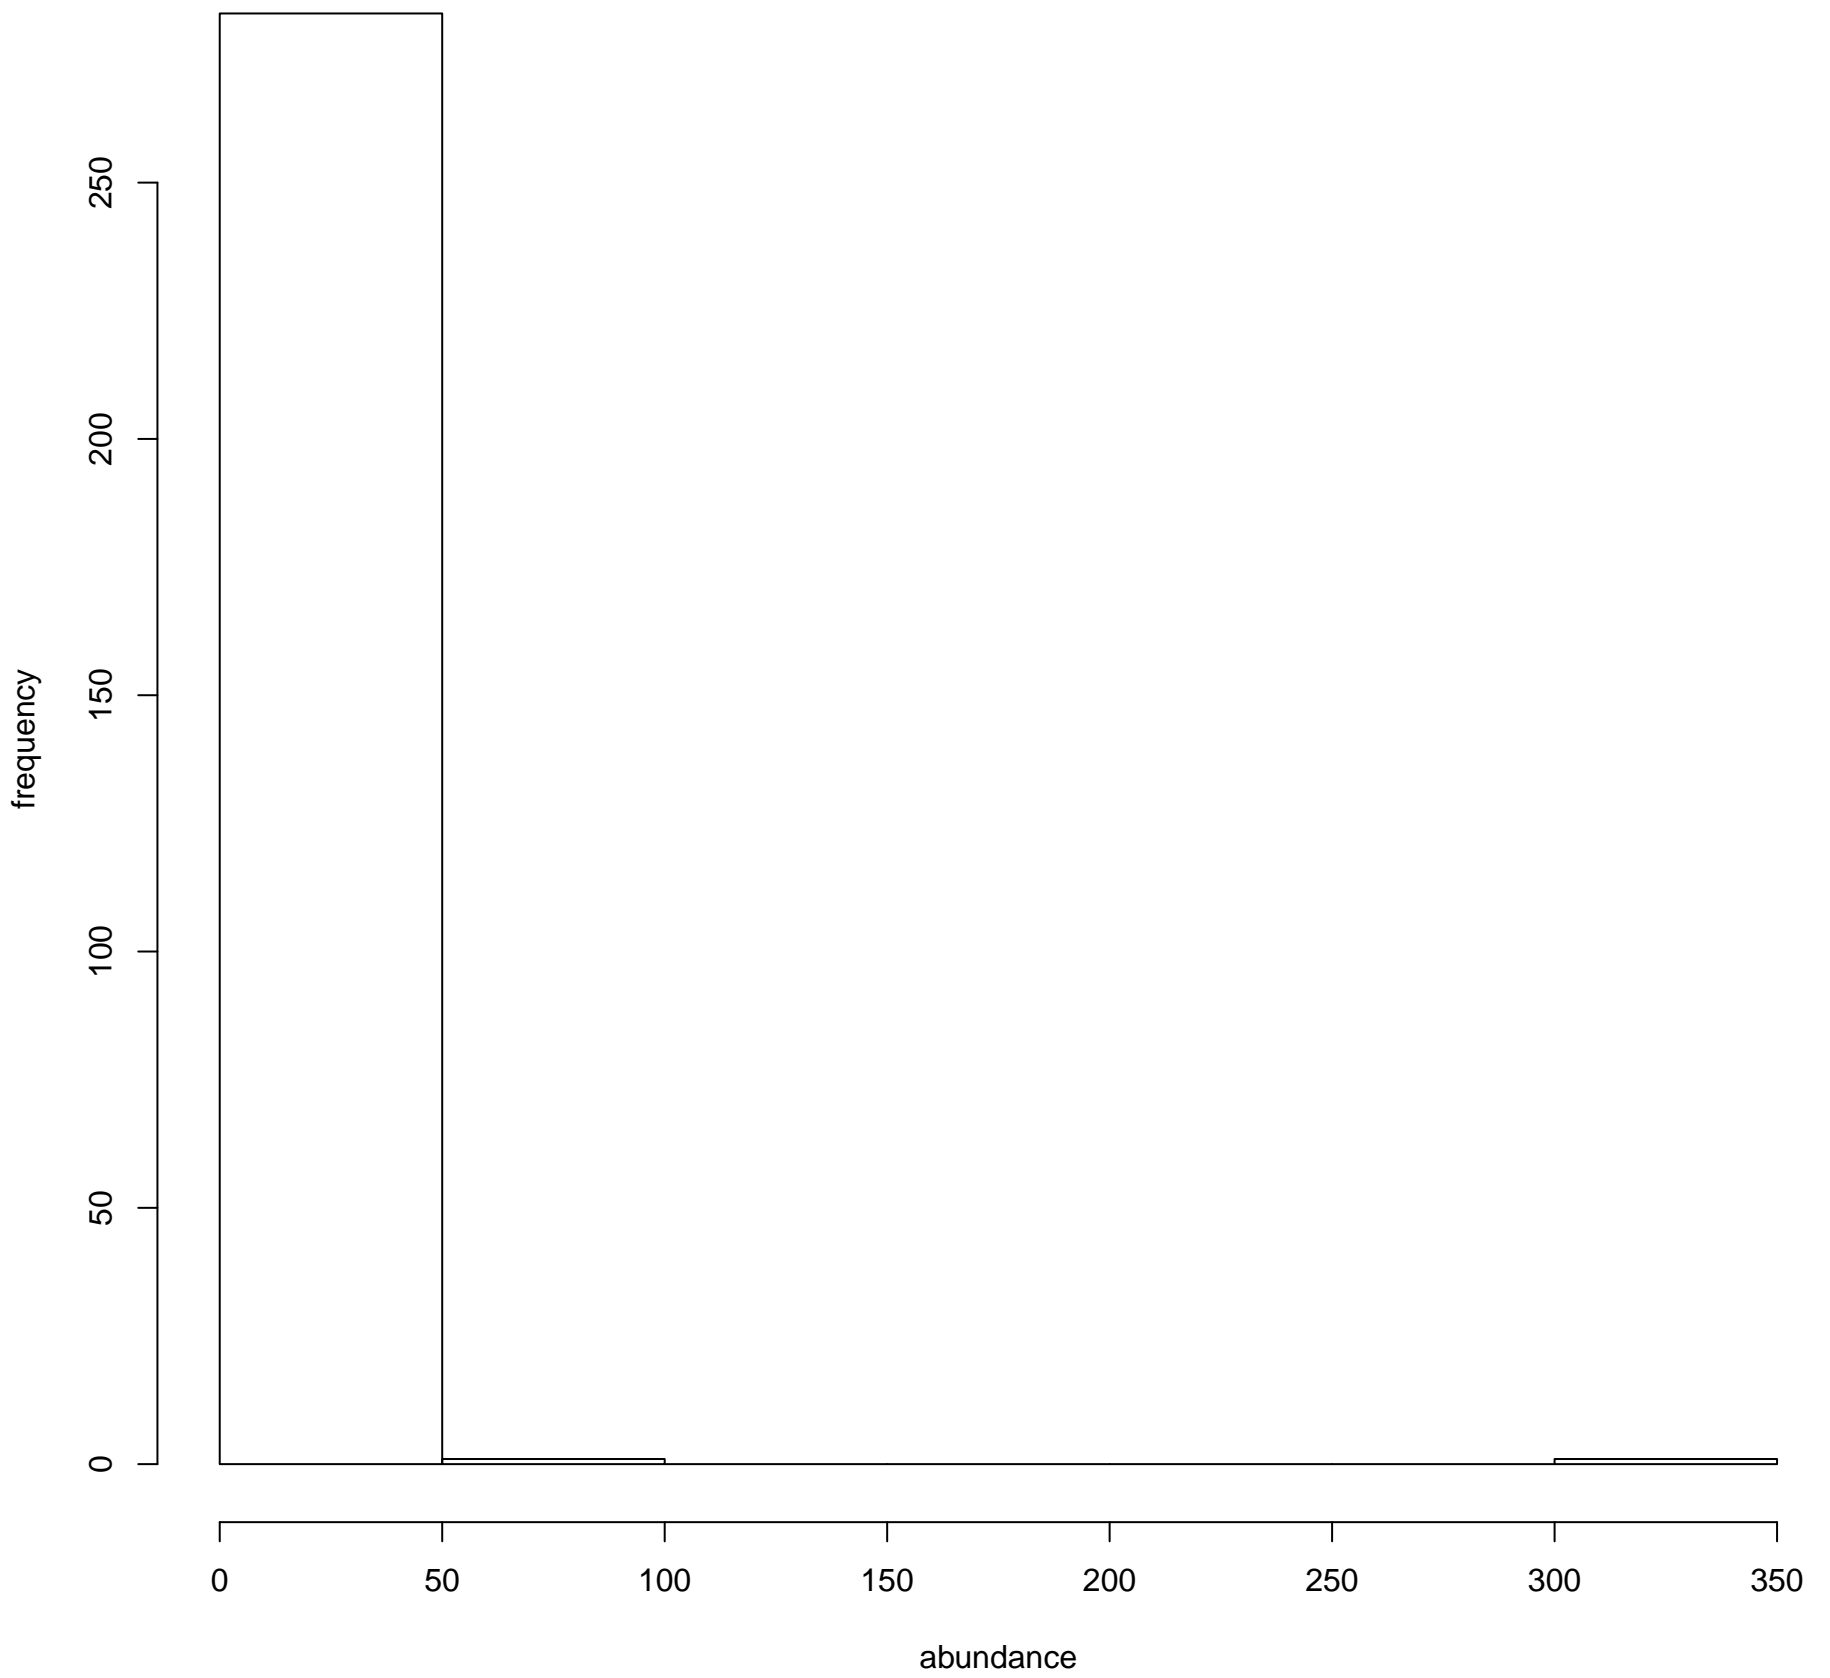

# Gard

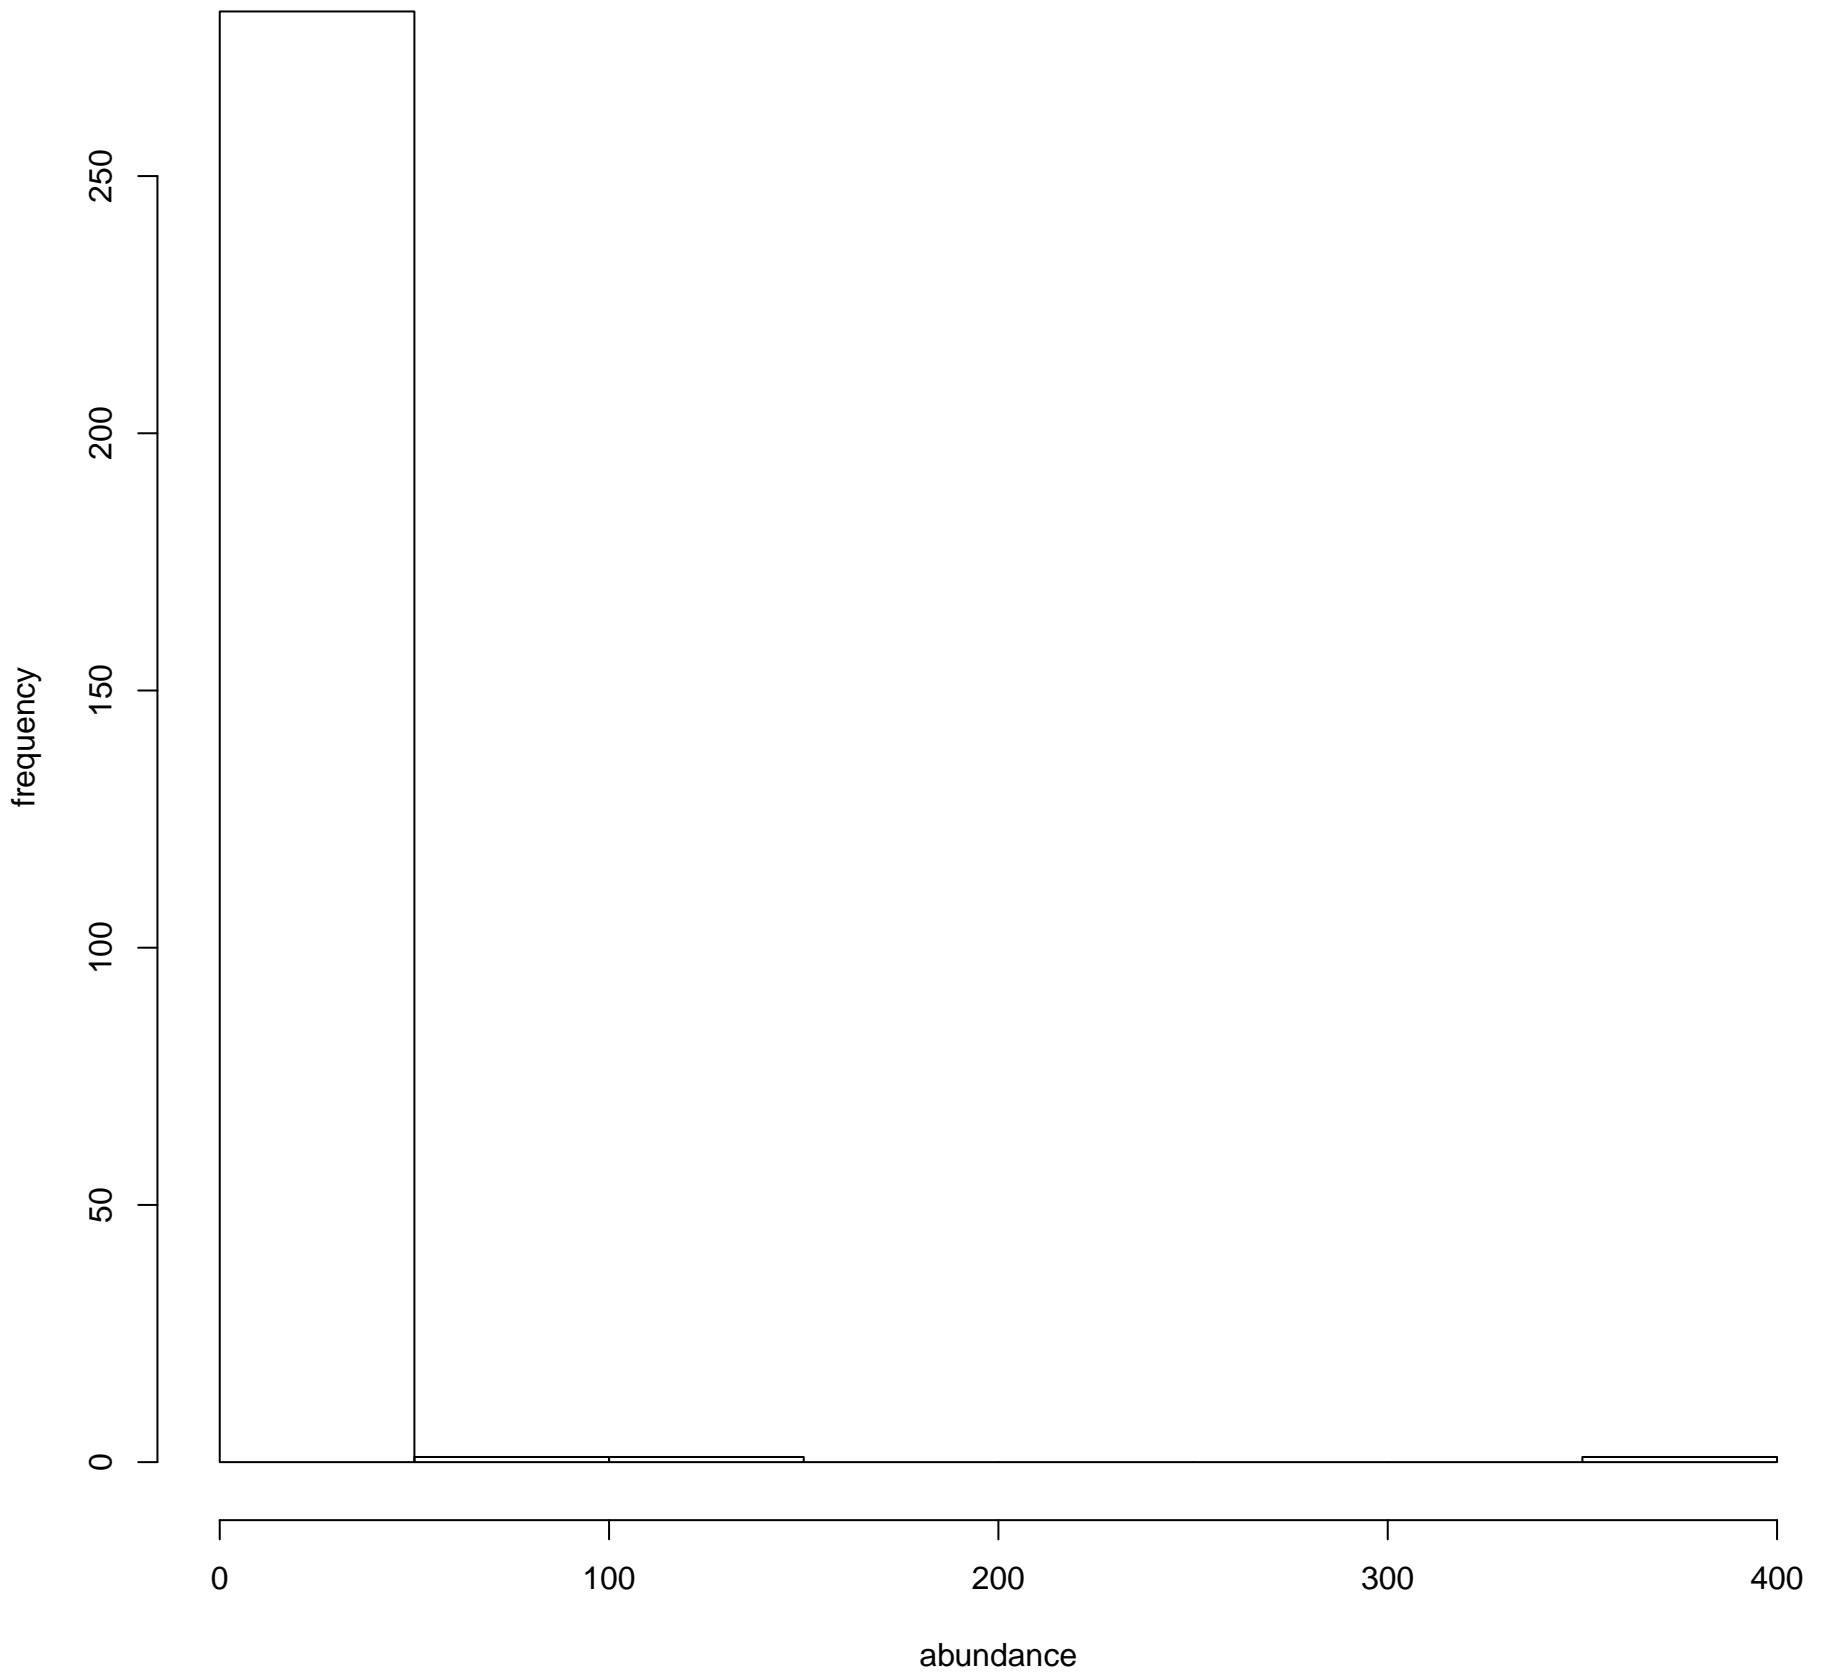

# Bac.oides

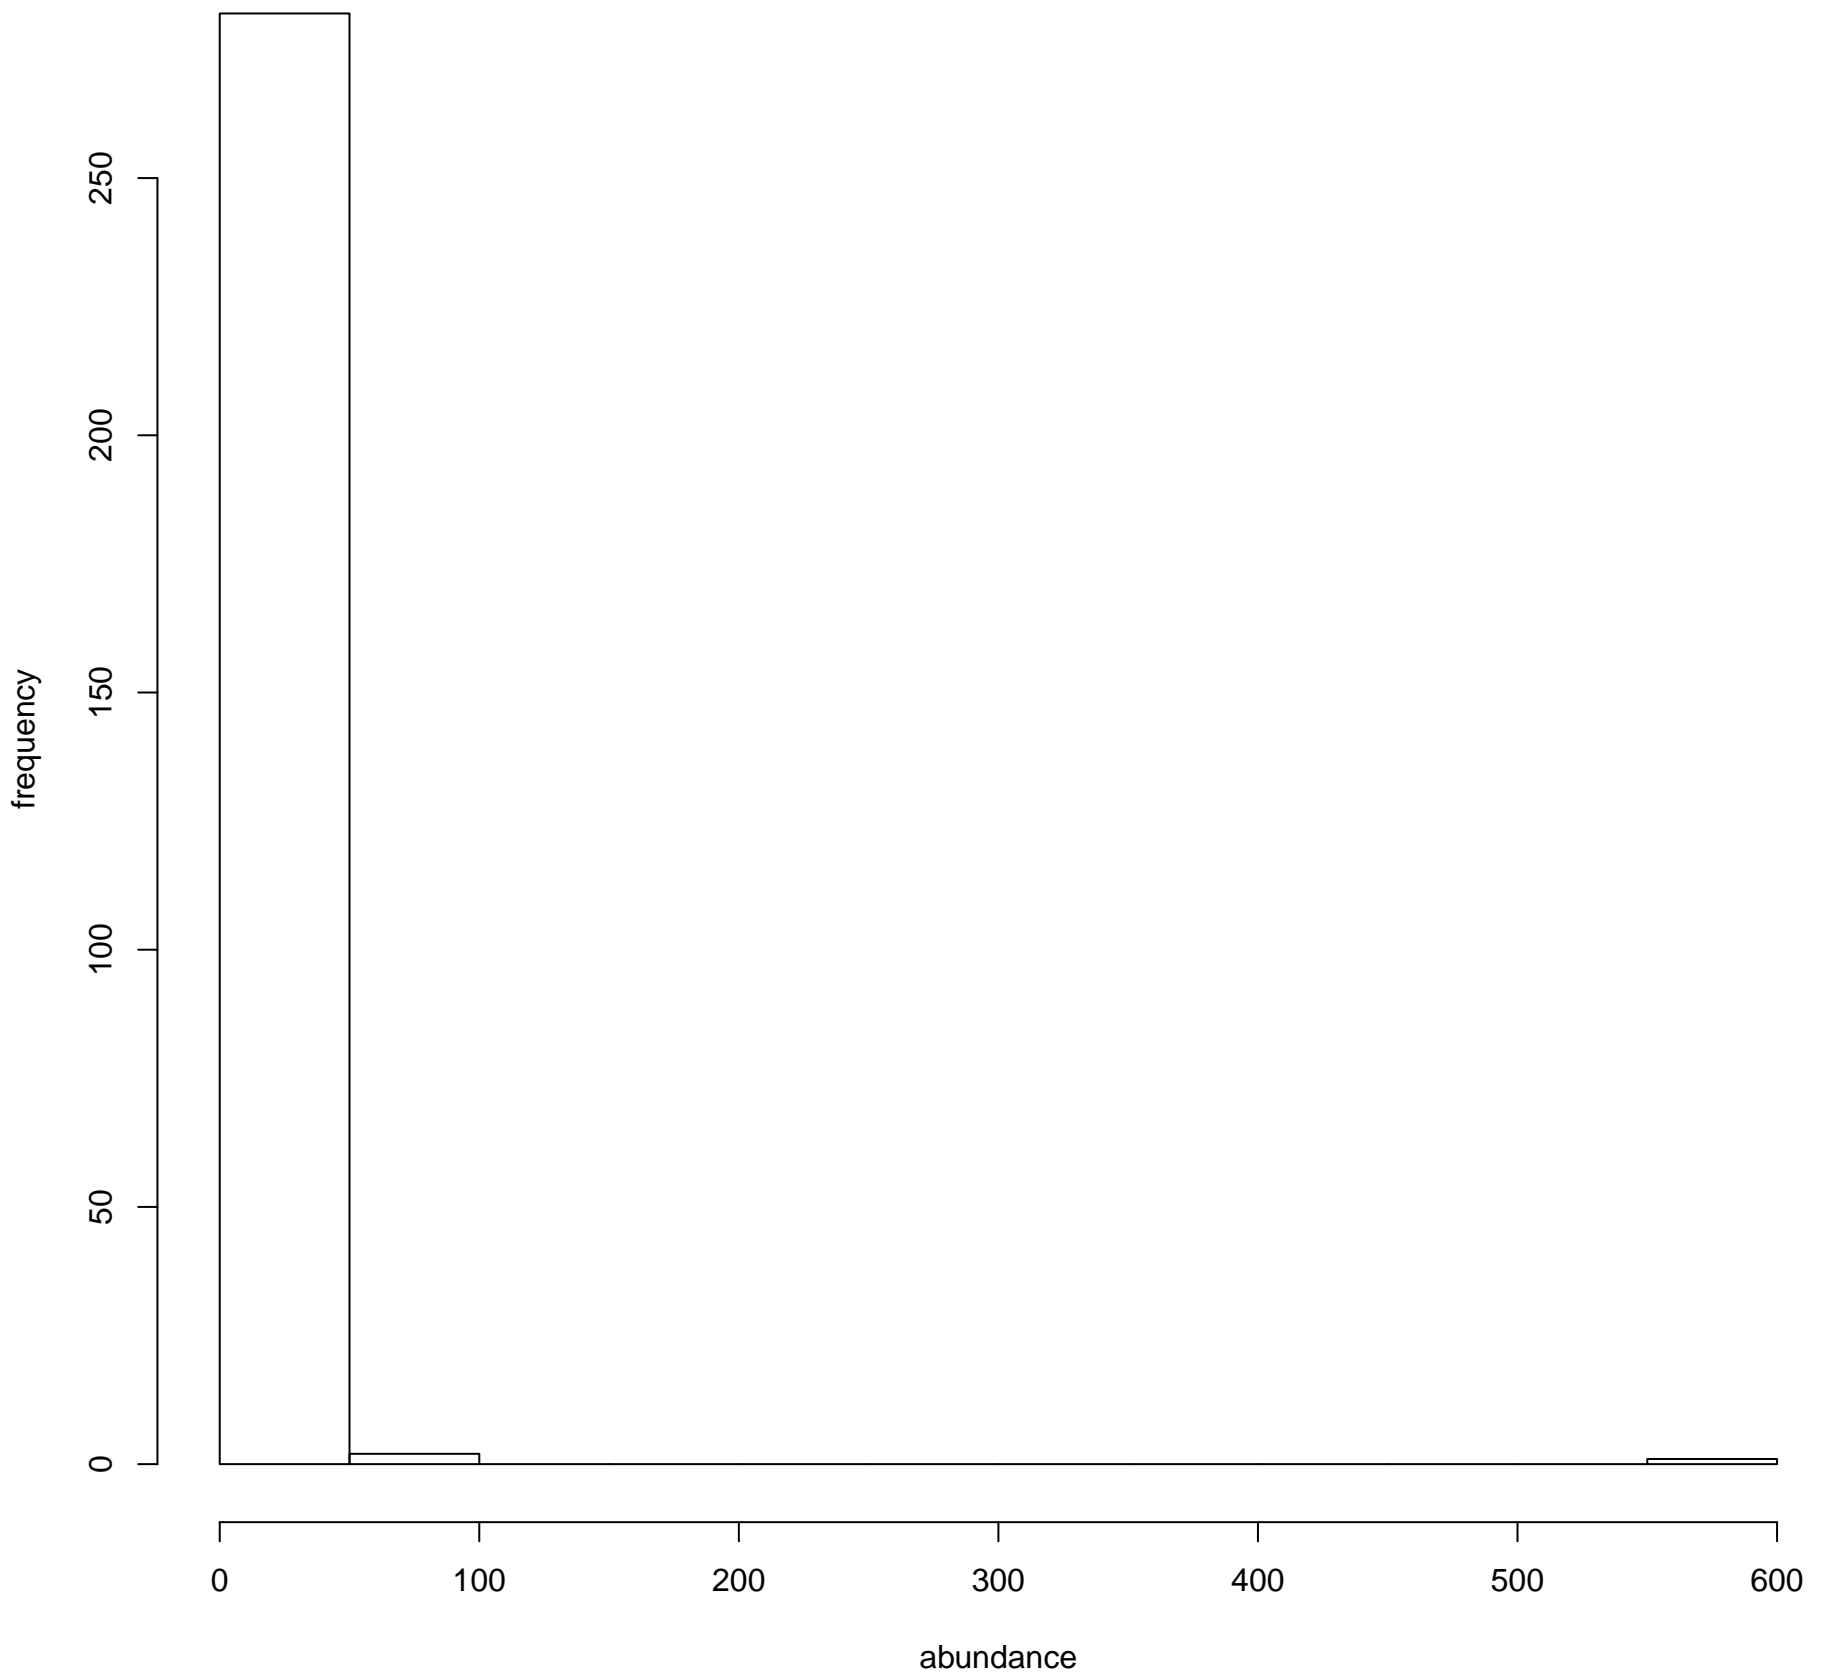

Supplement: pone.0191625.s008.pdf [file pone.0191625.s008.pdf]
