# Supplementary material for: Associations between sexual habits, menstrual hygiene practices, demographics and the vaginal microbiome as revealed by Bayesian network analysis
Source: PubMed Central journal article supplement (PMC5783405; doi:10.1371/journal.pone.0191625), 2018-01-24

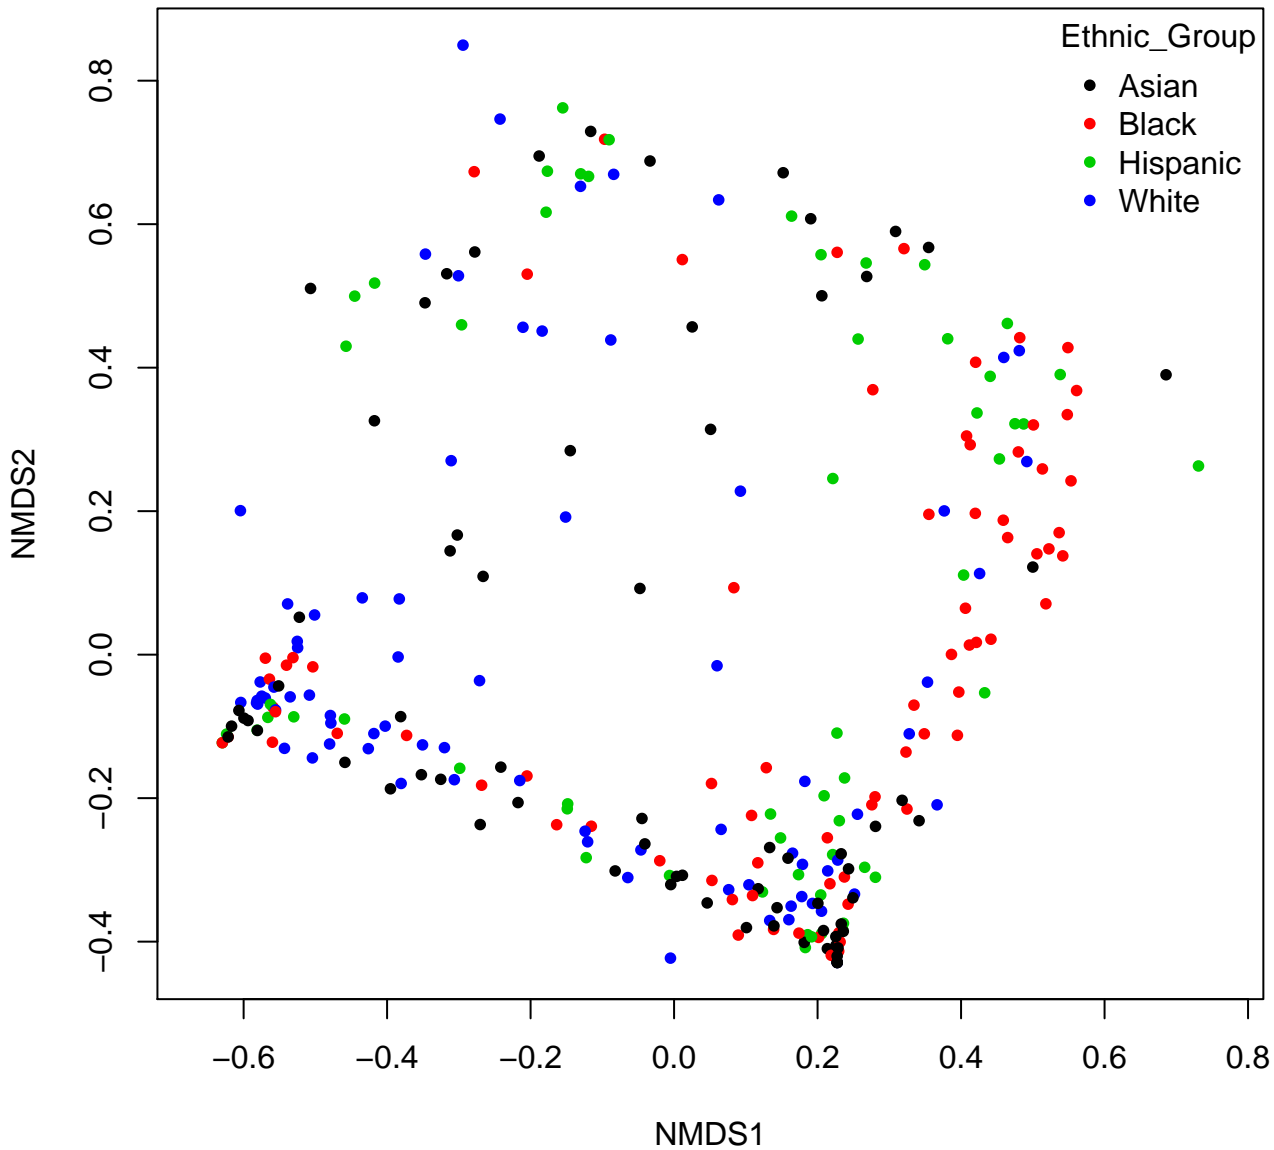

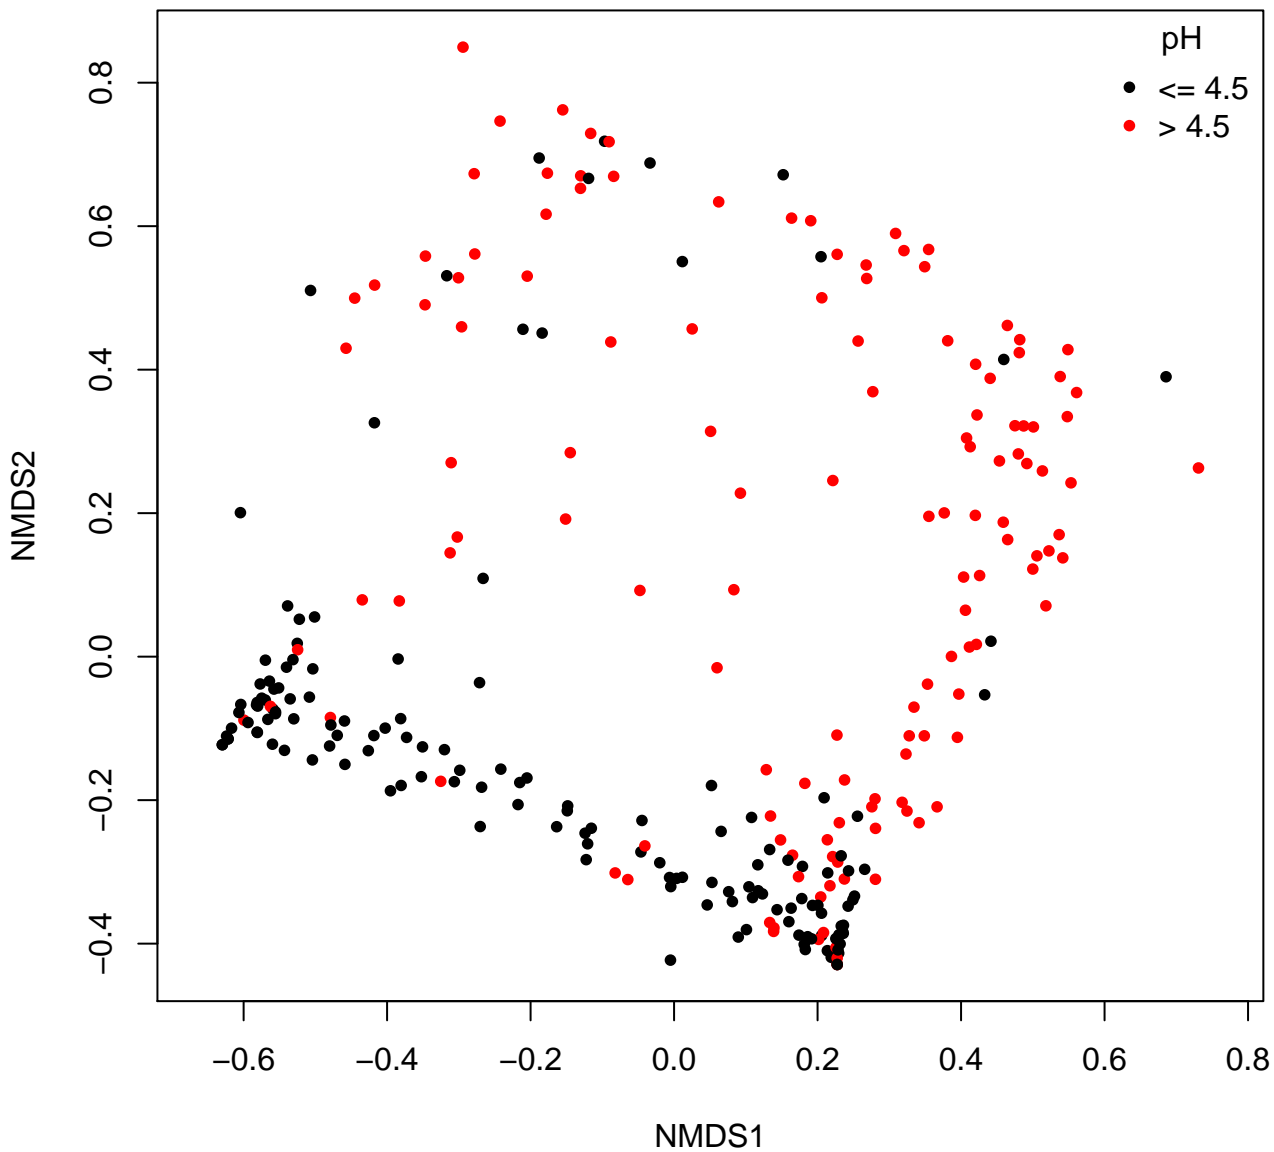

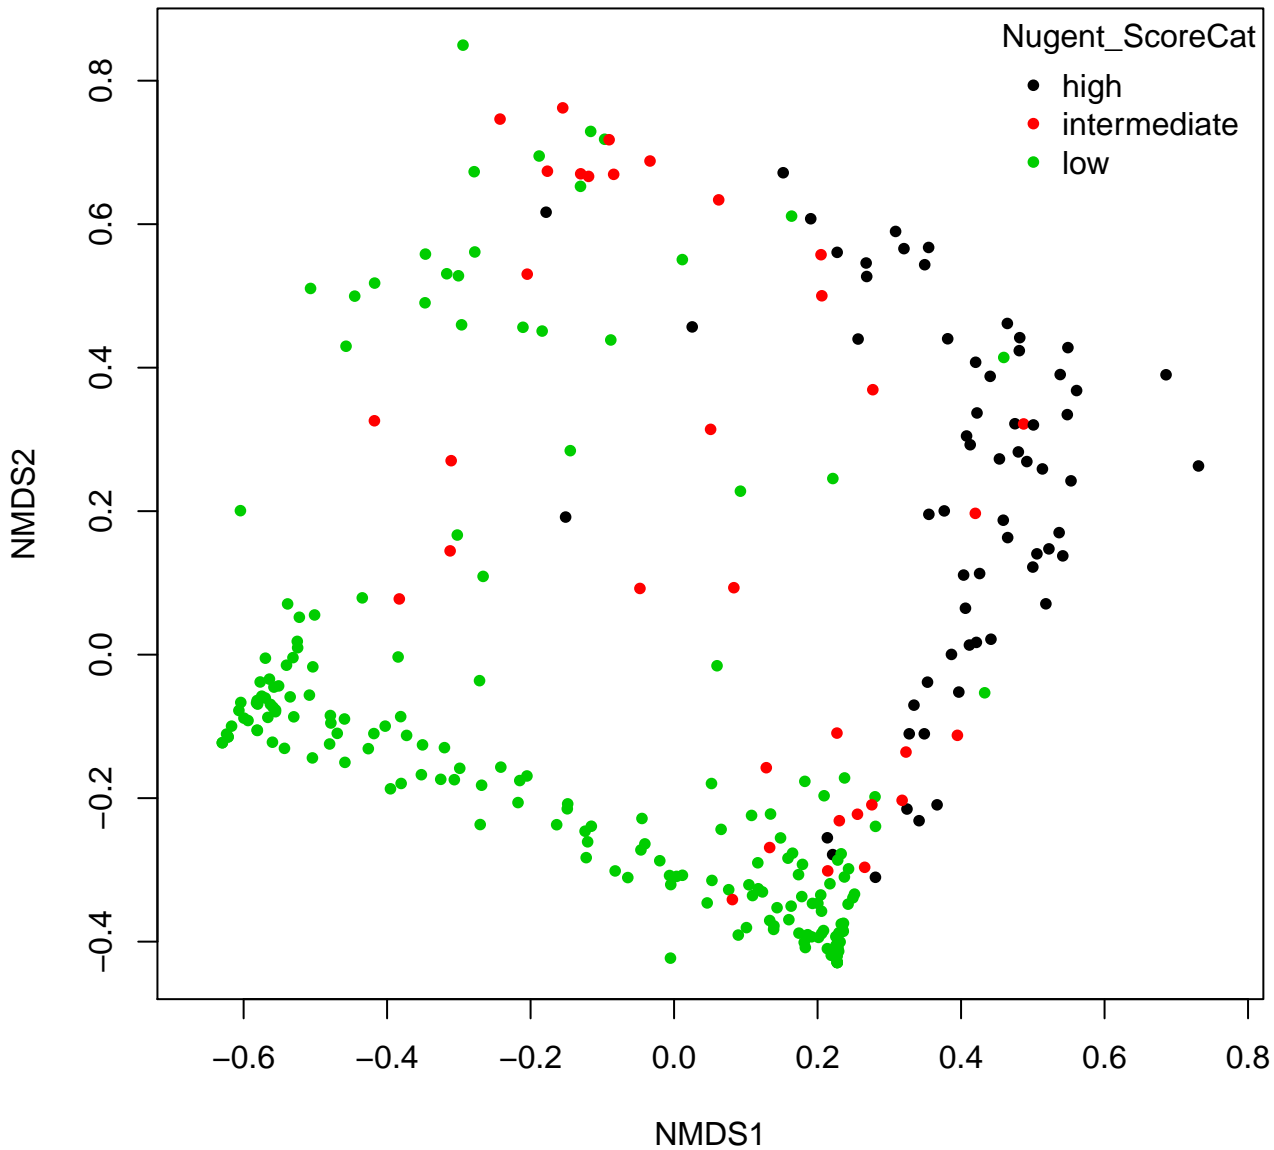

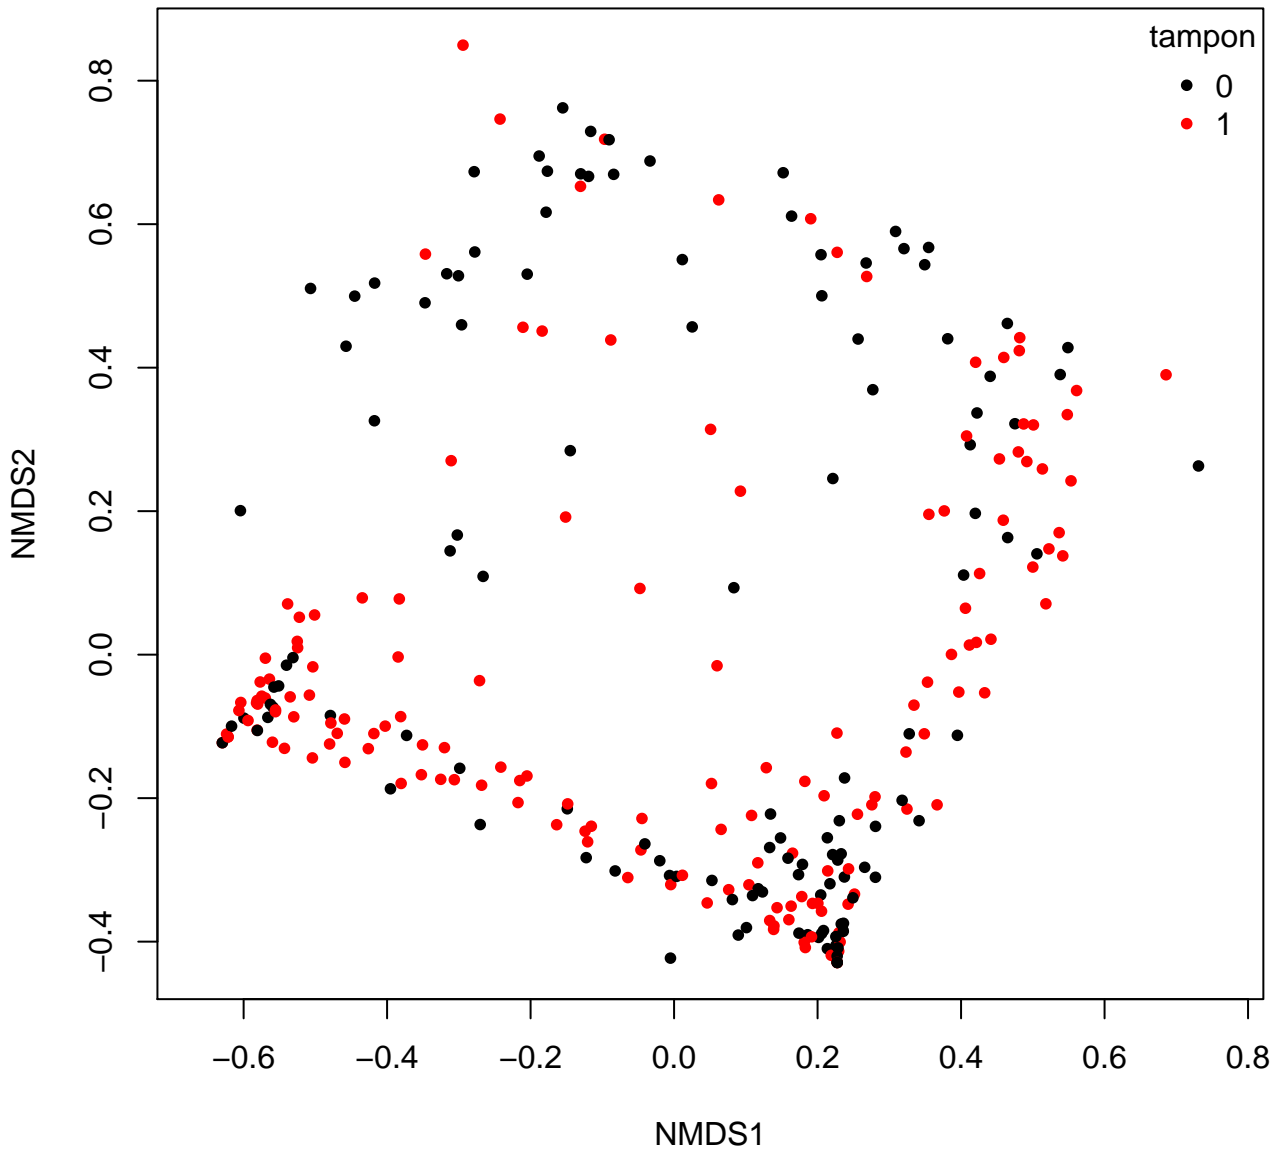

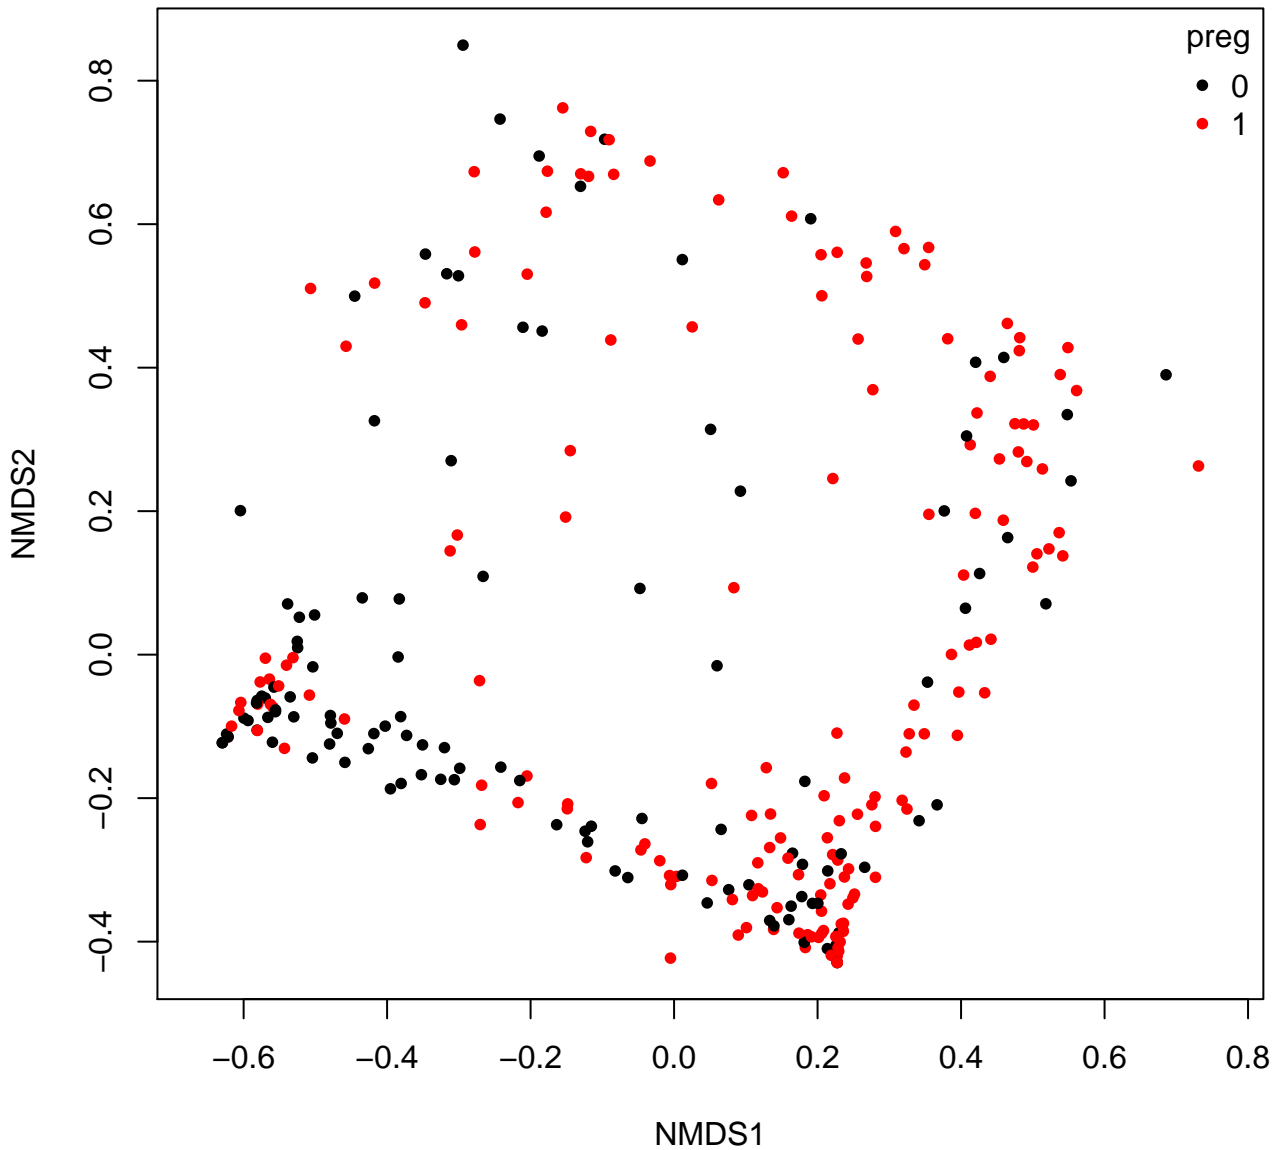

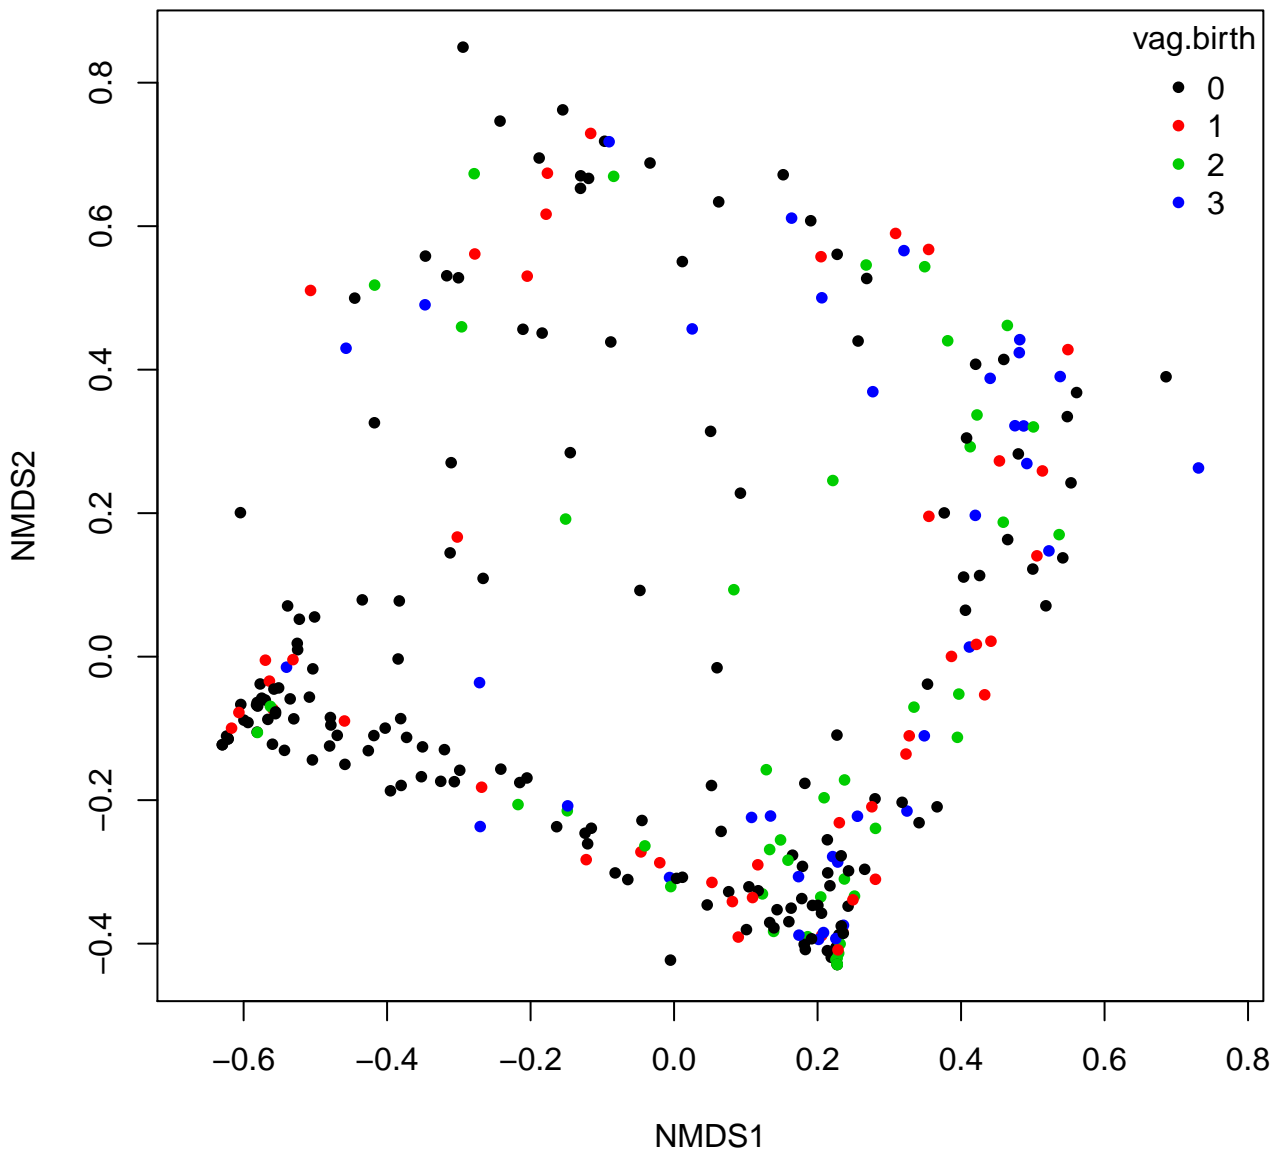

Supplement: pone.0191625.s007.pdf [file pone.0191625.s007.pdf]
